# Supplementary material
Source: HighWire-hosted journal article supplement (https://rapm.bmj.com/highwire/filestream/24268/field_highwire_adjunct_files/1/rapm-2023-104884supp002_data_supplement.pdf)
Supplement: rapm-2023-104884supp002_data_supplement.pdf [file rapm-2023-104884supp002_data_supplement.pdf]

## Standardising nomenclature in regional anaesthesia: an international Delphi consensus study

This document includes the results from all rounds of this Delphi study.

  VIEW BLOCKS THAT HAVE BEEN AGREED  

[FINAL LIST](#)

  VIEW THE THIRD ROUND DELPHI  

[THIRD ROUND DELPHI](#)

  VIEW THE FULL STEERING GROUP DECISIONS AND SUMMARY RESULTS FROM THE SECOND ROUND  

[SECOND ROUND DECISIONS](#)

  VIEW THE FULL RESULTS FROM THE SECOND ROUND  

[SECOND ROUND DELPHI: RESULTS](#)

  VIEW THE RATIONALE FOR THE SECOND ROUND  

[SECOND ROUND RATIONALE](#)

  VIEW THE FULL STEERING GROUP DECISIONS AND SUMMARY RESULTS FROM THE FIRST ROUND  

[FIRST ROUND DECISIONS](#)

  VIEW THE FULL RESULTS FROM THE FIRST ROUND (NAMES)  

[RESULTS: NAMES](#)

  VIEW THE FULL RESULTS FROM THE FIRST ROUND (ANATOMICAL DESCRIPTIONS)  

[RESULTS: DESCRIPTIONS](#)

  VIEW THE SUMMARY RESULTS FROM THE FIRST ROUND CLARIFYING QUESTIONS  

[RESULTS: CLARIFYING QUESTIONS](#)

Standardising nomenclature in regional anaesthesia: an international Delphi consensus study

[BACK TO CONTENTS](#)

Delphi study 

|               |
|---------------|
| AGREED BLOCKS |
|---------------|

|       | NAME                                                             | Agree | Disagree | Unsure | DESCRIPTION (anatomical location of injection)                                                                                                                                | Agree | Disagree | Unsure | Round Included | Consensus |
|-------|------------------------------------------------------------------|-------|----------|--------|-------------------------------------------------------------------------------------------------------------------------------------------------------------------------------|-------|----------|--------|----------------|-----------|
| UPPER | Interscalene brachial plexus block                               | 98%   | 1%       | 1%     | Injection at the C5 and C6 nerve roots between anterior and middle scalene muscles                                                                                            | 83%   | 10%      | 7%     | 2              | Strong    |
|       | Superior trunk block                                             | 92%   | 0%       | 8%     | Injection at the superior trunk before the suprascapular nerve emerges                                                                                                        | 80%   | 6%       | 15%    | 2              | Strong    |
|       | Supraclavicular brachial plexus block                            | 99%   | 0%       | 1%     | Injection at the divisions of the brachial plexus immediately cephalad to the clavicle                                                                                        | 78%   |          |        | 3              | Strong    |
|       | Infraclavicular brachial plexus block                            | 82%   | 9%       | 10%    | Injection at the cords of the brachial plexus                                                                                                                                 | 87%   | 8%       | 6%     | 2              | Strong    |
|       | Infraclavicular brachial plexus block (Retroclavicular approach) | 78%   | 7%       | 15%    | Injection at the cords of the brachial plexus where the needle insertion is proximal to the clavicle                                                                          | 72%   |          |        | 3              | Strong    |
|       | Infraclavicular brachial plexus block (Costoclavicular approach) | 85%   | 7%       | 8%     | Injection at the cords of the brachial plexus in the medial infraclavicular fossa at the first part of the axillary artery                                                    | 90%   |          |        | 3              | Strong    |
|       | Infraclavicular brachial plexus block (Coracoid approach)        | 85%   |          |        | Injection at the cords of the brachial plexus in the lateral infraclavicular fossa at the second part of the axillary artery                                                  | 82%   |          |        | 3              | Strong    |
|       | Axillary brachial plexus block                                   | 95%   | 0%       | 5%     | Injection at the branches of the brachial plexus in the axillary region                                                                                                       | 66%   |          |        | 3              | Weak      |
|       | Suprascapular nerve block (anterior approach)                    | 87%   | 5%       | 8%     | Injection of the suprascapular nerve coming off superior trunk and travelling to posterior neck under the posterior belly of Omohyoid muscle                                  | 84%   | 4%       | 12%    | 2              | Strong    |
|       | Suprascapular nerve (posterior approach)                         | 89%   | 2%       | 8%     | Injection of the suprascapular nerve in the suprascapular notch or suprascapular fossa                                                                                        | 84%   | 8%       | 8%     | 2              | Strong    |
|       | Deep cervical plexus block                                       | 95%   | 2%       | 2%     | Injection at one of more of the nerve roots of C2, 3, and 4, deep to the prevertebral fascia                                                                                  | 88%   |          |        | 3              | Strong    |
|       | Intermediate cervical plexus block                               | 93%   |          |        | Injection deep to the investing fascia and superficial to the prevertebral fascia at the midpoint of the posterior border of sternocleidomastoid muscle                       | 93%   |          |        | 3              | Strong    |
|       | Superficial cervical plexus block                                | 98%   | 0%       | 2%     | Injection superficial to the investing fascia at the midpoint of the posterior border of sternocleidomastoid muscle                                                           | 85%   | 2%       | 13%    | 2              | Strong    |
| LOWER | Lumbar plexus block                                              | 97%   | 1%       | 2%     | Injection at the level of the lumbar roots (L2-4) coursing in the posterior third of the psoas muscle                                                                         | 95%   | 0%       | 5%     | 2              | Strong    |
|       | Sacral plexus block                                              | 98%   | 1%       | 1%     | Injection at the the sacral plexus just medial to the posterior border of the ischium. The plexus lies deep to the piriformis muscle lateral to the inferior gluteal vessels. | 79%   | 11%      | 11%    | 2              | Strong    |
|       | Fascia iliaca block (supra-inguinal approach)                    | 99%   | 0%       | 1%     | Injection deep to the fascia iliaca over the surface of the iliacus muscle, and proximal to the inguinal ligament.                                                            | 78%   | 3%       | 19%    | 2              | Strong    |
|       | Fascia iliaca block (infra-inguinal approach)                    | 98%   | 1%       | 1%     | Injection deep to the fascia iliaca, over the surface of the iliacus muscle, and lateral to the femoral nerve, distal to the inguinal ligament.                               | 85%   |          |        | 3              | Strong    |
|       | Sciatic nerve block (Transgluteal approach)                      | 87%   | 8%       | 5%     | Injection at the sciatic nerve deep to the gluteus maximus muscle.                                                                                                            | 96%   | 1%       | 3%     | 2              | Strong    |
|       | Sciatic nerve block (Infragluteal approach)                      | 90%   | 7%       | 3%     | Injection at the sciatic nerve at the mid thigh region distal to the inferior border of the gluteus maximus muscle.                                                           | 87%   | 5%       | 8%     | 2              | Strong    |

|       |                                                                           |     |     |     |                                                                                                                                                                                                                                                                                                  |     |     |     |   |        |
|-------|---------------------------------------------------------------------------|-----|-----|-----|--------------------------------------------------------------------------------------------------------------------------------------------------------------------------------------------------------------------------------------------------------------------------------------------------|-----|-----|-----|---|--------|
| LOWER | Sciatic nerve block (Anterior approach)                                   | 86% | 7%  | 7%  | Injection at the sciatic nerve between the adductor magnus anteriorly and gluteus maximus or biceps femoris muscles.                                                                                                                                                                             | 93% | 3%  | 4%  | 2 | Strong |
| LOWER | Femoral nerve block                                                       | 99% | 0%  | 1%  | Injection at the femoral nerve cephalad to the bifurcation of the femoral artery, deep to the fascia iliaca                                                                                                                                                                                      | 97% |     |     | 3 | Strong |
| LOWER | Pericapsular nerve group (PENG) block                                     | 77% | 9%  | 14% | Injection in the musculofascial plane between the psoas tendon anteriorly and the pubic ramus posteriorly.                                                                                                                                                                                       | 63% |     |     | 3 | Weak   |
| LOWER | Pudendal nerve block                                                      | 85% | 11% | 3%  | Injection at the pudendal nerve medial to the pudendal artery between the sacrospinous and sacrotuberous ligaments at the level of ischial spine                                                                                                                                                 | 79% | 20% | 1%  | 1 | Strong |
| LOWER | Femoral triangle block                                                    | 76% | 10% | 14% | Injection in the aponeurotic compartment containing the femoral vessels proximal to the apex of the femoral triangle. The apex of the femoral triangle is the point where the medial borders of the sartorius and adductor longus muscles cross.                                                 | 76% | 10% | 14% | 2 | Strong |
| LOWER | Adductor canal block                                                      | 85% | 7%  | 8%  | Injection in the aponeurotic compartment containing the femoral vessels distal to the apex of the femoral triangle and proximal to the adductor hiatus. The apex of the femoral triangle is the point where the medial borders of the sartorius and adductor longus muscles cross.               | 80% | 7%  | 13% | 1 | Strong |
| LOWER | Infiltration between the popliteal artery and capsule of the knee (IPACK) | 86% | 9%  | 5%  | Injection in the soft tissues between the popliteal artery and the posterior surface of the distal femur                                                                                                                                                                                         | 92% | 2%  | 6%  | 1 | Strong |
| LOWER | Superior medial genicular nerve block                                     | 79% | 16% | 6%  | Injection at the superior medial genicular nerve next to the genicular artery on the medial side of the distal femur                                                                                                                                                                             | 75% | 21% | 4%  | 1 | Strong |
| LOWER | Superior lateral genicular nerve block                                    | 80% | 15% | 6%  | Injection at the superior lateral genicular nerve next to the genicular artery on the lateral side of the distal femur                                                                                                                                                                           | 75% | 21% | 4%  | 1 | Strong |
| LOWER | Inferior medial genicular nerve block                                     | 81% | 13% | 6%  | Injection at the inferior medial genicular nerve near the genicular artery at the junction of the medial condyle of the tibia and tibial shaft.                                                                                                                                                  | 67% |     |     | 3 | Weak   |
| LOWER | Inferior lateral genicular nerve block                                    | 78% | 17% | 6%  | Injection at the inferior lateral genicular nerve near the genicular artery at the proximal fibula                                                                                                                                                                                               | 69% |     |     | 3 | Weak   |
| LOWER | Sciatic nerve block at the popliteal fossa                                | 87% |     |     | Injection at the tibial nerve distal to the sciatic nerve bifurcation                                                                                                                                                                                                                            | 91% | 1%  | 8%  | 3 | Strong |
| LOWER | Nerve to vastus medialis block                                            | 84% | 8%  | 7%  | Injection at the nerve to vastus medialis where it is located deep to the sartorius and lateral to the saphenous nerve and femoral vessels in the femoral triangle                                                                                                                               | 79% | 13% | 8%  | 2 | Strong |
| LOWER | Common peroneal nerve block                                               | 90% | 1%  | 9%  | Injection at the common peroneal nerve distal to sciatic nerve bifurcation                                                                                                                                                                                                                       | 93% | 1%  | 6%  | 1 | Strong |
| LOWER | Ankle block                                                               | 86% | 7%  | 7%  | Injection at the 5 distal nerves that provide innervation of the foot at the level of the ankle: Posterior tibial nerve, Deep Peroneal nerve, Superficial Peroneal nerve, Saphenous and Sural nerves.                                                                                            | 91% | 2%  | 7%  | 1 | Strong |
| LOWER | Deep peroneal nerve block                                                 | 95% | 3%  | 1%  | Injection at the deep peroneal nerve above the intermalleolar line, medial to the anterior tibial artery                                                                                                                                                                                         | 84% | 7%  | 9%  | 1 | Strong |
| LOWER | Superficial peroneal nerve block                                          | 97% | 2%  | 1%  | Injection at the superficial peroneal nerve superficially between the peroneus brevis and the extensor digitorum longus as a triangular hyperechoic shadow under the crural fascia. The extensor digitorum longus is anterior to the nerve, while the peroneus brevis is posterior to the nerve. | 88% | 6%  | 7%  | 1 | Strong |
| LOWER | Sural nerve block                                                         | 92% | 5%  | 3%  | Injection at the sural nerve above the lateral malleolus, anterior to the achilles tendon and posterior to the peroneus brevis                                                                                                                                                                   | 90% | 6%  | 4%  | 1 | Strong |
| LOWER | Saphenous nerve block at the ankle                                        | 92% | 5%  | 3%  | Injection at the saphenous nerve proximal to the medial malleolus, anterior to the great saphenous vein                                                                                                                                                                                          | 94% | 3%  | 2%  | 1 | Strong |

PERIPHERAL NERVE BLOCK TEMPLATE

| NAME                                                       | ANATOMICAL DESCRIPTION |     |     |                                                                                                                                                            |     |     |     | ROUND INCLUDED |
|------------------------------------------------------------|------------------------|-----|-----|------------------------------------------------------------------------------------------------------------------------------------------------------------|-----|-----|-----|----------------|
| Midhumeral block                                           | 44%                    | 11% | 45% | Injection around the median, ulnar and radial nerves individually at the junction of the upper third and middle third of the arm.                          | 58% | 1%  | 41% | 2              |
| OR                                                         |                        |     |     |                                                                                                                                                            |     |     |     |                |
| Peripheral nerve block                                     | 55%                    | 11% | 34% | <NAME OF PERIPHERAL NERVE> block at the <LOCATION>                                                                                                         | 69% | 7%  | 24% | 2              |
| Forearm block                                              | 39%                    | 6%  | 55% | Injection at the median, ulnar, radial nerves at the level of elbow                                                                                        | 36% | 7%  | 58% | 2              |
| OR                                                         |                        |     |     |                                                                                                                                                            |     |     |     |                |
| Peripheral nerve block                                     | 68%                    | 4%  | 29% | <NAME OF PERIPHERAL NERVE> block at the <LOCATION>                                                                                                         | 70% | 5%  | 26% | 2              |
| Wrist block                                                |                        |     |     | Injection at the median, ulnar and radial nerves at the level of the wrist by separate injections                                                          | 49% | 1%  | 49% | 2              |
| OR                                                         | 47%                    | 4%  | 49% |                                                                                                                                                            |     |     |     |                |
| Peripheral nerve block                                     | 64%                    | 4%  | 32% | <NAME OF PERIPHERAL NERVE> block at the <LOCATION>                                                                                                         | 62% | 5%  | 33% | 2              |
| Intercostobrachial nerve block                             | 84%                    | 1%  | 15% | Injection 2-3 cm distal to the axillary crease in an anterior-posterior distribution approximately 3 -5 cm wide between the biceps and the triceps muscles | 56% | 11% | 33% | 2              |
| OR                                                         |                        |     |     |                                                                                                                                                            |     |     |     |                |
| Peripheral nerve block                                     | 29%                    | 4%  | 67% | <NAME OF PERIPHERAL NERVE> block at the <LOCATION>                                                                                                         | 42% | 6%  | 52% | 2              |
| Saphenous nerve block at the knee                          | 26%                    | 11% | 63% | Injection at the saphenous nerve deep to the sartorius muscle and posterior to the saphenous branch of the descending genicular artery                     | 52% | 11% | 37% | 2              |
| OR                                                         |                        |     |     |                                                                                                                                                            |     |     |     |                |
| Saphenous nerve block (at the level of the adductor canal) | 57%                    | 7%  | 35% |                                                                                                                                                            | 49% | 11% | 40% | 2              |
| Peripheral nerve block                                     | 46%                    | 5%  | 49% | <NAME OF PERIPHERAL NERVE> block at the <LOCATION>                                                                                                         | 45% | 8%  | 47% | 2              |
| Infrapatellar nerve block                                  | 76%                    | 11% | 13% | Injection around infrapatellar branch in the superficial fascial layer between sartorius and vastus medialis distal to exit from adductor canal            | 49% | 34% | 17% | 1              |
| Axillary nerve block                                       | 93%                    | 2%  | 5%  | Injection at the axillary nerve <SPECIFY LOCATION>                                                                                                         | 95  |     |     | 3              |
| Lateral femoral cutaneous nerve block                      | 100%                   | 0%  | 0%  | <NAME OF PERIPHERAL NERVE> block at the <LOCATION>                                                                                                         | 82  |     |     | 3              |
| Posterior femoral cutaneous nerve block                    | 94%                    | 2%  | 2%  | <NAME OF PERIPHERAL NERVE> block at the <LOCATION>                                                                                                         | 92  |     |     | 3              |
| Obturator nerve block                                      | 93%                    | 2%  | 5%  | <NAME OF PERIPHERAL NERVE> block at the <LOCATION>                                                                                                         | 95  |     |     | 3              |
| Genitofemoral nerve block                                  | 92%                    | 2%  | 5%  | <NAME OF PERIPHERAL NERVE> block at the <LOCATION>                                                                                                         | 85  |     |     | 3              |
| Tibial nerve block at the ankle                            | 81%                    | 5%  | 14% | <NAME OF PERIPHERAL NERVE> block at the <LOCATION>                                                                                                         | 96  |     |     | 3              |

Standardising nomenclature in regional anaesthesia: an international Delphi consensus study

[BACK TO CONTENTS](#)

Delphi study 

ROUND 2

| REGION |    | NAME                                                           | Agree | Unsure | Disagree | Decision (Name) | DESCRIPTION (anatomical location of injection)                                                                                                          | Agree | Unsure | Disagree | Decision (Description) |
|--------|----|----------------------------------------------------------------|-------|--------|----------|-----------------|---------------------------------------------------------------------------------------------------------------------------------------------------------|-------|--------|----------|------------------------|
|        | 1  | Supraclavicular brachial plexus block                          |       |        |          | INCLUDE         | Injection at the divisions of the brachial plexus                                                                                                       |       |        |          | EXCLUDE                |
|        |    |                                                                |       |        |          |                 | OR                                                                                                                                                      |       |        |          |                        |
|        | 2  | Deep cervical plexus block                                     |       |        |          | INCLUDE         | Injection at the divisions of the brachial plexus immediately cephalad to the clavicle                                                                  | 78%   |        | 22%      | INCLUDE                |
|        |    |                                                                |       |        |          |                 | OR                                                                                                                                                      |       |        |          | EXCLUDE                |
|        | 3  | Intermediate cervical plexus block                             | 93%   |        |          | ROUND 3         | Injection adjacent to one of more of the transverse processes of C2, 3, and 4, (e.g. a paravertebral technique), deep to the prevertebral fascia        |       |        |          | EXCLUDE                |
|        |    |                                                                |       |        |          |                 | OR                                                                                                                                                      |       |        |          | INCLUDE                |
|        | 4  | Axillary brachial plexus block                                 |       |        |          | INCLUDE         | Injection at one of more of the nerve roots of C2, 3, and 4, deep to the prevertebral fascia                                                            | 88%   |        |          | INCLUDE                |
|        |    |                                                                |       |        |          |                 | OR                                                                                                                                                      |       |        |          | EXCLUDE                |
|        | 5  | Axillary nerve block                                           |       |        |          | INCLUDE         | Injection deep to the investing fascia at the midpoint of the posterior border of sternocleidomastoid muscle                                            |       |        |          | EXCLUDE                |
|        |    |                                                                |       |        |          |                 | OR                                                                                                                                                      |       |        |          | INCLUDE                |
|        | 6  | Infrascapular brachial plexus block (Retroclavicular approach) |       |        |          | INCLUDE         | Injection deep to the investing fascia and superficial to the prevertebral fascia at the midpoint of the posterior border of sternocleidomastoid muscle | 93%   |        |          | INCLUDE                |
|        |    |                                                                |       |        |          |                 | OR                                                                                                                                                      |       |        |          | EXCLUDE                |
|        | 7  | Infrascapular brachial plexus block (Costoclavicular approach) |       |        |          | INCLUDE         | Injection at the branches of the brachial plexus at the level of the axilla                                                                             | 34%   |        |          | EXCLUDE                |
|        |    |                                                                |       |        |          |                 | OR                                                                                                                                                      |       |        |          | INCLUDE                |
|        | 8  | Infrascapular brachial plexus block (Coracoid approach)        | 85%   |        |          | INCLUDE         | Injection at the branches of the brachial plexus in the axillary region                                                                                 | 68%   |        |          | INCLUDE                |
|        |    |                                                                |       |        |          |                 | OR                                                                                                                                                      |       |        |          | EXCLUDE                |
|        | 9  | Femoral nerve block                                            |       |        |          | INCLUDE         | Injection at the axillary nerve in the upper humerus exiting the quadrangular space                                                                     | 3%    |        |          | EXCLUDE                |
|        |    |                                                                |       |        |          |                 | OR                                                                                                                                                      |       |        |          | INCLUDE                |
|        | 10 | Fascia ilaca block (infra-inguinal approach)                   |       |        |          | INCLUDE         | Injection at the axillary nerve <SPECIFY LOCATION>                                                                                                      | 95%   |        |          | INCLUDE                |
|        |    |                                                                |       |        |          |                 | OR                                                                                                                                                      |       |        |          | EXCLUDE                |
|        | 11 | Lateral femoral cutaneous nerve block                          |       |        |          | INCLUDE         | Injection at the cords of the brachial plexus                                                                                                           | 28%   |        |          | EXCLUDE                |
|        |    |                                                                |       |        |          |                 | OR                                                                                                                                                      |       |        |          | INCLUDE                |
|        | 12 | Posterior femoral cutaneous nerve block                        |       |        |          | INCLUDE         | Injection at the cords of the brachial plexus where the needle insertion is proximal to the clavicle                                                    | 72%   |        |          | INCLUDE                |
|        |    |                                                                |       |        |          |                 | OR                                                                                                                                                      |       |        |          | EXCLUDE                |

|    |   |                                            |     |  |         |                                                                                                                                                                                                                                                                                                                                                                                                 |                                                    |     |  |         |
|----|---|--------------------------------------------|-----|--|---------|-------------------------------------------------------------------------------------------------------------------------------------------------------------------------------------------------------------------------------------------------------------------------------------------------------------------------------------------------------------------------------------------------|----------------------------------------------------|-----|--|---------|
| 12 | b |                                            |     |  | INCLUDE | Injection at the posterior femoral cutaneous nerve superficial and lateral to the sciatic nerve in the subgluteal region                                                                                                                                                                                                                                                                        | 8%                                                 |     |  | EXCLUDE |
|    | c |                                            |     |  |         | <NAME OF PERIPHERAL NERVE> block at the <LOCATION>                                                                                                                                                                                                                                                                                                                                              | 92%                                                |     |  | INCLUDE |
| 13 | a | Obturator nerve block                      |     |  | INCLUDE | Injection at the obturator nerve proximal to the bifurcation into anterior and posterior divisions in the plane between the pectineus and obturator externus muscles branches of the obturator nerve in the upper medial thigh as they lie anteriorly and posteriorly to the adductor brevis muscle respectively                                                                                |                                                    |     |  | EXCLUDE |
|    | b |                                            |     |  |         | Injection at the obturator nerve proximal to the bifurcation into anterior and posterior divisions in the plane between the pectineus and obturator externus muscles                                                                                                                                                                                                                            | 5%                                                 |     |  | EXCLUDE |
|    | c |                                            |     |  |         | <NAME OF PERIPHERAL NERVE> block at the <LOCATION>                                                                                                                                                                                                                                                                                                                                              | 95%                                                |     |  | INCLUDE |
| 14 | a | Genitofemoral nerve block                  |     |  | INCLUDE | Injection at the genitofemoral nerve, which is an oval structure lying medial and superficial to the femoral artery in the inguinal canal. The contents of the inguinal canal are identified, with testicular vessels located laterally and spermatic cord medially. The needle is advanced in an in-plane approach to direct the needle towards the spermatic cord to block the genital branch |                                                    |     |  | EXCLUDE |
|    | b |                                            |     |  |         | Injection at the genitofemoral nerve, which is an oval structure lying medial and superficial to the femoral artery in the inguinal canal                                                                                                                                                                                                                                                       | 15%                                                |     |  | EXCLUDE |
|    | c |                                            |     |  |         | <NAME OF PERIPHERAL NERVE> block at the <LOCATION>                                                                                                                                                                                                                                                                                                                                              | 85%                                                |     |  | INCLUDE |
| 15 | a | Pericapsular nerve group (PENG) block      |     |  | INCLUDE | The ilio-pubic eminence (IPE), the iliopectus muscle and tendon, the femoral artery, and pectineus muscle are imaged. Injection in the musculofascial plane between the psoas tendon anteriorly and the pubic ramus posteriorly.                                                                                                                                                                |                                                    |     |  | EXCLUDE |
|    | b |                                            |     |  |         | Injection in the musculofascial plane between the psoas tendon anteriorly and the pubic ramus posteriorly.                                                                                                                                                                                                                                                                                      | 63%                                                | 37% |  | INCLUDE |
| 16 | a | Inferior medial genicular nerve block      |     |  | INCLUDE | Injection near the genicular artery at the junction of medial condyle of tibia and tibial shaft                                                                                                                                                                                                                                                                                                 | 31%                                                |     |  | EXCLUDE |
|    | b |                                            |     |  |         | Injection at the inferior medial genicular nerve near the genicular artery at the junction of the medial condyle of the tibia and tibial shaft.                                                                                                                                                                                                                                                 | 67                                                 |     |  | INCLUDE |
| 17 | a | Inferior lateral genicular nerve block     |     |  | INCLUDE | Injection near the genicular artery at the proximal fibula                                                                                                                                                                                                                                                                                                                                      | 31%                                                |     |  | EXCLUDE |
|    | b |                                            |     |  |         | Injection at the inferior lateral genicular nerve near the genicular artery at the proximal fibula                                                                                                                                                                                                                                                                                              | 69                                                 |     |  | INCLUDE |
| 18 | a | Popliteal sciatic nerve block              | 4%  |  | EXCLUDE | Injection at the sciatic nerve at or near the point of bifurcation in the popliteal fossa                                                                                                                                                                                                                                                                                                       |                                                    |     |  | INCLUDE |
|    | b | Sciatic nerve block at the popliteal fossa | 96% |  | INCLUDE |                                                                                                                                                                                                                                                                                                                                                                                                 |                                                    |     |  | INCLUDE |
|    | c | Peripheral nerve block                     |     |  |         | ROUND 3                                                                                                                                                                                                                                                                                                                                                                                         | <NAME OF PERIPHERAL NERVE> block at the <LOCATION> |     |  | ROUND 3 |
| 19 | a | Selective tibial nerve block               | 13% |  | EXCLUDE | Injection at the tibial nerve distal to the sciatic nerve bifurcation                                                                                                                                                                                                                                                                                                                           |                                                    |     |  | INCLUDE |
|    | b | Tibial nerve block at the popliteal fossa  | 87% |  | INCLUDE |                                                                                                                                                                                                                                                                                                                                                                                                 |                                                    |     |  |         |
| 20 | a | Tibial nerve block at the ankle            |     |  | INCLUDE | Injection at the posterior tibial nerve proximal to medial malleolus, the tendons of the tibialis anterior and flexor digitorum profundus are anterior to the nerve and gastrocnemius-soleus posterior to it. The posterior tibial artery and the tendon of flexor hallucis longus lie deep to the nerve, often with two small veins on either side of the artery.                              |                                                    |     |  | EXCLUDE |
|    |   |                                            |     |  |         | Injection at the tibial nerve proximal to medial malleolus, the tendons of the tibialis anterior and flexor digitorum profundus are anterior to the nerve and gastrocnemius-soleus posterior to it. The posterior tibial artery and the tendon of flexor hallucis longus lie deep to the nerve, often with two small veins on either side of the artery.                                        | 4%                                                 |     |  | EXCLUDE |
|    | b |                                            |     |  | ROUND 3 | <NAME OF PERIPHERAL NERVE> block at the <LOCATION>                                                                                                                                                                                                                                                                                                                                              | 96%                                                |     |  | -       |

Standardising nomenclature in regional anaesthesia: an international Delphi consensus study

[BACK TO CONTENTS](#)

Delphi study 

ROUND 2

| REGION |    | NAME                                                             | Agree                                   | Unsure | Disagree | Decision (Name) | DESCRIPTION (anatomical location of injection)                                                                                                                                                                          | Agree                                                                                                                                                                                  | Unsure | Disagree | Decision (Description) |         |
|--------|----|------------------------------------------------------------------|-----------------------------------------|--------|----------|-----------------|-------------------------------------------------------------------------------------------------------------------------------------------------------------------------------------------------------------------------|----------------------------------------------------------------------------------------------------------------------------------------------------------------------------------------|--------|----------|------------------------|---------|
|        | 1  | Supraclavicular brachial plexus block                            | 99%                                     | 0%     | 1%       | INCLUDE         | Injection at the divisions of the brachial plexus                                                                                                                                                                       | 43%                                                                                                                                                                                    | 14%    | 43%      | EXCLUDE                |         |
|        |    |                                                                  |                                         |        |          |                 | OR                                                                                                                                                                                                                      |                                                                                                                                                                                        |        |          |                        |         |
|        |    |                                                                  |                                         |        |          |                 | Injection at the divisions of the brachial plexus immediately cephalad to the clavicle                                                                                                                                  | 63%                                                                                                                                                                                    | 8%     | 29%      | ROUND 3                |         |
|        |    |                                                                  |                                         |        |          |                 |                                                                                                                                                                                                                         |                                                                                                                                                                                        |        |          |                        |         |
|        | 2  | Deep cervical plexus block                                       | 95%                                     | 2%     | 2%       | INCLUDE         | Injection adjacent to one of more of the transverse processes of C2, 3, and 4. (e.g. a paravertebral technique), deep to the prevertebral fascia                                                                        | 34%                                                                                                                                                                                    | 24%    | 42%      | EXCLUDE                |         |
|        |    |                                                                  |                                         |        |          |                 | OR                                                                                                                                                                                                                      |                                                                                                                                                                                        |        |          |                        |         |
|        |    |                                                                  |                                         |        |          |                 | Injection at one of more of the nerve roots of C2, 3, and 4, deep to the prevertebral fascia                                                                                                                            | 68%                                                                                                                                                                                    | 9%     | 23%      | ROUND 3                |         |
|        |    |                                                                  |                                         |        |          |                 |                                                                                                                                                                                                                         |                                                                                                                                                                                        |        |          |                        |         |
|        | 3  | Intermediate cervical plexus block                               | 68%                                     | 22%    | 10%      | ROUND 3         | Injection deep to the investing fascia at the midpoint of the posterior border of sternocleidomastoid muscle                                                                                                            | 62%                                                                                                                                                                                    | 17%    | 21%      | ROUND 3                |         |
|        |    |                                                                  |                                         |        |          |                 | Injection deep to the investing fascia and superficial to the prevertebral fascia at the midpoint of the posterior border of sternocleidomastoid muscle                                                                 | NEW PROPOSAL                                                                                                                                                                           |        |          | ROUND 3                |         |
|        | 4  | Axillary brachial plexus block                                   | 95%                                     | 0%     | 5%       | INCLUDE         | Injection at the branches of the brachial plexus at the level of the axilla                                                                                                                                             | 60%                                                                                                                                                                                    | 6%     | 33%      | ROUND 3                |         |
|        |    |                                                                  |                                         |        |          |                 | OR                                                                                                                                                                                                                      |                                                                                                                                                                                        |        |          |                        |         |
|        |    |                                                                  |                                         |        |          |                 | Injection at the branches of the brachial plexus in the axillary region                                                                                                                                                 | 59%                                                                                                                                                                                    | 7%     | 34%      | ROUND 3                |         |
|        |    |                                                                  |                                         |        |          |                 |                                                                                                                                                                                                                         |                                                                                                                                                                                        |        |          |                        |         |
|        | 5  | Axillary nerve block                                             | 93%                                     | 2%     | 5%       | INCLUDE         | Injection at the axillary nerve in the upper humerus exiting the quadrangular space                                                                                                                                     | 56%                                                                                                                                                                                    | 9%     | 35%      | ROUND 3                |         |
|        |    |                                                                  |                                         |        |          |                 | OR                                                                                                                                                                                                                      |                                                                                                                                                                                        |        |          |                        |         |
|        |    |                                                                  |                                         |        |          |                 | Injection at the axillary nerve <SPECIFY LOCATION>                                                                                                                                                                      | 57%                                                                                                                                                                                    | 10%    | 32%      | ROUND 3                |         |
|        |    |                                                                  |                                         |        |          |                 |                                                                                                                                                                                                                         |                                                                                                                                                                                        |        |          |                        |         |
|        | 6  | Infraclavicular brachial plexus block (Retroclavicular approach) | 78%                                     | 7%     | 15%      | INCLUDE         | Injection at the cords of the brachial plexus                                                                                                                                                                           | 64%                                                                                                                                                                                    | 10%    | 26%      | ROUND 3                |         |
|        |    |                                                                  |                                         |        |          |                 | Injection at the cords of the brachial plexus where the needle insertion is proximal to the clavicle                                                                                                                    | NEW PROPOSAL                                                                                                                                                                           |        |          | ROUND 3                |         |
|        | 7  | Infraclavicular brachial plexus block (Costoclavicular approach) | 85%                                     | 7%     | 8%       | INCLUDE         | Injection at the brachial plexus in the proximal infra-clavicular fossa, where the lateral, medial, and posterior cords are tightly bundled                                                                             | 64%                                                                                                                                                                                    | 11%    | 25%      | ROUND 3                |         |
|        |    |                                                                  |                                         |        |          |                 | Injection at the cords of the brachial plexus in the medial infraclavicular fossa at the first part of the axillary artery                                                                                              | NEW PROPOSAL                                                                                                                                                                           |        |          | ROUND 3                |         |
|        | 8  | Infraclavicular brachial plexus block (Coracoid approach)        | NEW PROPOSAL                            |        |          | ROUND 3         | Injection at the cords of the brachial plexus in the lateral infraclavicular fossa at the second part of the axillary artery                                                                                            | NEW PROPOSAL                                                                                                                                                                           |        |          | ROUND 3                |         |
|        | 9  | Femoral nerve block                                              | 99%                                     | 0%     | 1%       | INCLUDE         | Injection at the femoral nerve cephalad to the bifurcation of the femoral artery, distal to the inguinal ligament and deep to both fascia lata and fascia ilaca, over the surface of the iliacus muscle.                | 51%                                                                                                                                                                                    | 15%    | 34%      | ROUND 3                |         |
|        |    |                                                                  |                                         |        |          |                 | Injection at the femoral nerve cephalad to the bifurcation of the femoral artery, deep to the fascia ilaca                                                                                                              | 64%                                                                                                                                                                                    | 7%     | 29%      | ROUND 3                |         |
|        | 10 | Fascia ilaca block (infra-inguinal approach)                     | 98%                                     | 1%     | 1%       | INCLUDE         | Injection deep to the fascia ilaca, over the surface of the iliacus muscle, and lateral to the femoral nerve, distal to the inguinal ligament.                                                                          | 63%                                                                                                                                                                                    | 10%    | 27%      | ROUND 3                |         |
|        |    |                                                                  |                                         |        |          |                 | OR                                                                                                                                                                                                                      |                                                                                                                                                                                        |        |          |                        |         |
|        |    |                                                                  |                                         |        |          |                 | Injection deep to the fascia ilaca over the surface of the iliacus muscle, and distal to the inguinal ligament.                                                                                                         | 56%                                                                                                                                                                                    | 6%     | 38%      | ROUND 3                |         |
|        |    |                                                                  |                                         |        |          |                 |                                                                                                                                                                                                                         |                                                                                                                                                                                        |        |          |                        |         |
|        | 11 | Lateral femoral cutaneous nerve block                            | 100%                                    | 0%     | 0%       | INCLUDE         | Injection at the lateral femoral cutaneous nerve medial to the tensor fascia lata and lateral to the sartorius muscle in a plane between the fascia lata and fascia ilaca, distal to the anterior superior iliac spine. | 36%                                                                                                                                                                                    | 17%    | 46%      | EXCLUDE                |         |
|        |    |                                                                  |                                         |        |          |                 | Injection at the lateral femoral cutaneous nerve medial to the tensor fascia lata and lateral to the sartorius muscle in a plane between the fascia lata and fascia ilaca.                                              | 69%                                                                                                                                                                                    | 8%     | 22%      | ROUND 3                |         |
|        |    |                                                                  |                                         |        |          |                 | <NAME OF PERIPHERAL NERVE> block at the <LOCATION>                                                                                                                                                                      | NEW PROPOSAL (PERIPHERAL NERVE BLOCK)                                                                                                                                                  |        |          | ROUND 3                |         |
|        |    |                                                                  |                                         |        |          |                 |                                                                                                                                                                                                                         |                                                                                                                                                                                        |        |          |                        |         |
|        |    |                                                                  | Posterior femoral cutaneous nerve block |        |          |                 |                                                                                                                                                                                                                         | Injection at the posterior femoral cutaneous nerve superficial and lateral to the sciatic nerve in the subgluteal region, and immediately deep to the gluteus maximus and fascia lata. | 35%    | 23%      | 42%                    | EXCLUDE |
|        |    |                                                                  |                                         |        |          |                 |                                                                                                                                                                                                                         | OR                                                                                                                                                                                     |        |          |                        |         |

|    |   |                                            |                                       |     |     |                                                                                                                                                                                                                                                                                                                                                          |                                                                                                                                                                                                                                                                                                                                                                                                 |                                       |     |                                                    |                                       |
|----|---|--------------------------------------------|---------------------------------------|-----|-----|----------------------------------------------------------------------------------------------------------------------------------------------------------------------------------------------------------------------------------------------------------------------------------------------------------------------------------------------------------|-------------------------------------------------------------------------------------------------------------------------------------------------------------------------------------------------------------------------------------------------------------------------------------------------------------------------------------------------------------------------------------------------|---------------------------------------|-----|----------------------------------------------------|---------------------------------------|
| 12 | b |                                            | 94%                                   | 2%  | 2%  | INCLUDE                                                                                                                                                                                                                                                                                                                                                  | Injection at the posterior femoral cutaneous nerve superficial and lateral to the sciatic nerve in the subgluteal region                                                                                                                                                                                                                                                                        | 65%                                   | 17% | 18%                                                | ROUND 3                               |
|    | c |                                            |                                       |     |     |                                                                                                                                                                                                                                                                                                                                                          | <NAME OF PERIPHERAL NERVE> block at the <LOCATION>                                                                                                                                                                                                                                                                                                                                              | NEW PROPOSAL (PERIPHERAL NERVE BLOCK) |     |                                                    | ROUND 3                               |
| 13 | a | Obturator nerve block                      | 93%                                   | 2%  | 5%  | INCLUDE                                                                                                                                                                                                                                                                                                                                                  | Injection at the obturator nerve proximal to the bifurcation into anterior and posterior divisions in the plane between the pectineus and obturator externus muscles branches of the obturator nerve in the upper medial thigh as they lie anteriorly and posteriorly to the adductor brevis muscle respectively                                                                                | 28%                                   | 16% | 55%                                                | EXCLUDE                               |
|    | b |                                            |                                       |     |     |                                                                                                                                                                                                                                                                                                                                                          | Injection at the obturator nerve proximal to the bifurcation into anterior and posterior divisions in the plane between the pectineus and obturator externus muscles                                                                                                                                                                                                                            | 68%                                   | 14% | 18%                                                | ROUND 3                               |
|    | c |                                            |                                       |     |     |                                                                                                                                                                                                                                                                                                                                                          |                                                                                                                                                                                                                                                                                                                                                                                                 |                                       |     | <NAME OF PERIPHERAL NERVE> block at the <LOCATION> | NEW PROPOSAL (PERIPHERAL NERVE BLOCK) |
| 14 | a | Genitofemoral nerve block                  | 92%                                   | 2%  | 5%  | INCLUDE                                                                                                                                                                                                                                                                                                                                                  | Injection at the genitofemoral nerve which is an oval structure lying medial and superficial to the femoral artery in the inguinal canal. The contents of the inguinal canal are identified , with testicular vessels located laterally and spermatic cord medially. The needle is advanced in an in-plane approach to direct the needle towards the spermatic cord to block the genital branch | 19%                                   | 15% | 66%                                                | ROUND 3                               |
|    | b |                                            |                                       |     |     |                                                                                                                                                                                                                                                                                                                                                          | Injection at the genitofemoral nerve which is an oval structure lying medial and superficial to the femoral artery in the inguinal canal.                                                                                                                                                                                                                                                       | 65%                                   | 15% | 20%                                                | ROUND 3                               |
|    | c |                                            |                                       |     |     |                                                                                                                                                                                                                                                                                                                                                          |                                                                                                                                                                                                                                                                                                                                                                                                 |                                       |     | <NAME OF PERIPHERAL NERVE> block at the <LOCATION> | NEW PROPOSAL (PERIPHERAL NERVE BLOCK) |
| 15 | a | Pericapsular nerve group (PENG) block      | 77%                                   | 9%  | 14% | INCLUDE                                                                                                                                                                                                                                                                                                                                                  | The ilio-pubic eminence (IPE), the iliopectus muscle and tendon, the femoral artery, and pectineus muscle are imaged. Injection in the musculofascial plane between the psoas tendon anteriorly and the pubic ramus posteriorly.                                                                                                                                                                | 31%                                   | 19% | 50%                                                | EXCLUDE                               |
|    | b |                                            |                                       |     |     |                                                                                                                                                                                                                                                                                                                                                          | Injection in the musculofascial plane between the psoas tendon anteriorly and the pubic ramus posteriorly.                                                                                                                                                                                                                                                                                      | 68%                                   | 8%  | 24%                                                | ROUND 3                               |
| 16 | a | Inferior medial genicular nerve block      | 81%                                   | 13% | 6%  | INCLUDE                                                                                                                                                                                                                                                                                                                                                  | Injection near the genicular artery at the junction of medial condyle of tibia and tibial shaft                                                                                                                                                                                                                                                                                                 | 73%                                   | 21% | 6%                                                 | ROUND 3                               |
|    | b |                                            |                                       |     |     |                                                                                                                                                                                                                                                                                                                                                          | Injection at the inferior medial genicular nerve near the genicular artery at the junction of the medial condyle of the tibia and tibial shaft.                                                                                                                                                                                                                                                 | NEW PROPOSAL                          |     |                                                    | ROUND 3                               |
| 17 | a | Inferior lateral genicular nerve block     | 78%                                   | 17% | 6%  | INCLUDE                                                                                                                                                                                                                                                                                                                                                  | Injection near the genicular artery at the proximal fibula                                                                                                                                                                                                                                                                                                                                      | 66%                                   | 27% | 6%                                                 | ROUND 3                               |
|    | b |                                            |                                       |     |     |                                                                                                                                                                                                                                                                                                                                                          | Injection at the inferior lateral genicular nerve near the genicular artery at the proximal fibula                                                                                                                                                                                                                                                                                              | NEW PROPOSAL                          |     |                                                    | ROUND 3                               |
| 18 | a | Popliteal sciatic nerve block              | 54%                                   | 11% | 35% | ROUND 3                                                                                                                                                                                                                                                                                                                                                  | Injection at the sciatic nerve at or near the point of bifurcation in the popliteal fossa                                                                                                                                                                                                                                                                                                       | 91%                                   | 1%  | 8%                                                 | INCLUDE                               |
|    | b | Sciatic nerve block at the popliteal fossa | 58%                                   | 7%  | 35% | ROUND 3                                                                                                                                                                                                                                                                                                                                                  |                                                                                                                                                                                                                                                                                                                                                                                                 | 86%                                   | 0%  | 14%                                                | INCLUDE                               |
|    | c | Peripheral nerve block                     | NEW PROPOSAL (PERIPHERAL NERVE BLOCK) |     |     | ROUND 3                                                                                                                                                                                                                                                                                                                                                  | <NAME OF PERIPHERAL NERVE> block at the <LOCATION>                                                                                                                                                                                                                                                                                                                                              | NEW PROPOSAL (PERIPHERAL NERVE BLOCK) |     |                                                    | ROUND 3                               |
| 19 | a | Selective tibial nerve block               | 39%                                   | 10% | 51% | EXCLUDE                                                                                                                                                                                                                                                                                                                                                  | Injection at the tibial nerve distal to the sciatic nerve bifurcation                                                                                                                                                                                                                                                                                                                           | 96%                                   | 3%  | 1%                                                 | INCLUDE                               |
|    | b | Tibial nerve block at the popliteal fossa  | 73%                                   | 7%  | 19% | ROUND 3                                                                                                                                                                                                                                                                                                                                                  |                                                                                                                                                                                                                                                                                                                                                                                                 |                                       |     |                                                    |                                       |
| 20 | a | Tibial nerve block at the ankle            | 81%                                   | 5%  | 14% | INCLUDE                                                                                                                                                                                                                                                                                                                                                  | Injection at the posterior tibial nerve proximal to medial malleolus, the tendons of the tibialis anterior and flexor digitorum profundus are anterior to the nerve and gastrocnemius-soleus posterior to it. The posterior tibial artery and the tendon of flexor hallucis longus lie deep to the nerve, often with two small veins on either side of the artery.                              | 39%                                   | 6%  | 55%                                                | EXCLUDE                               |
|    |   |                                            |                                       |     |     | Injection at the tibial nerve proximal to medial malleolus, the tendons of the tibialis anterior and flexor digitorum profundus are anterior to the nerve and gastrocnemius-soleus posterior to it. The posterior tibial artery and the tendon of flexor hallucis longus lie deep to the nerve, often with two small veins on either side of the artery. | 60%                                                                                                                                                                                                                                                                                                                                                                                             | 9%                                    | 31% | ROUND 3                                            |                                       |
|    | b |                                            |                                       |     |     | ROUND 3                                                                                                                                                                                                                                                                                                                                                  | <NAME OF PERIPHERAL NERVE> block at the <LOCATION>                                                                                                                                                                                                                                                                                                                                              | NEW PROPOSAL (PERIPHERAL NERVE BLOCK) |     |                                                    | ROUND 3                               |



Standardising nomenclature in regional anaesthesia: an international Delphi consensus study

[BACK TO CONTENTS](#)

Delphi study 

ROUND 2

| REGION     |    | NAME                                                                                                            | Agree | Unsure | Disagree | Decision (Name) | DESCRIPTION (anatomical location of injection)                                                                                                         | Agree | Unsure | Disagree | Decision (Description) |
|------------|----|-----------------------------------------------------------------------------------------------------------------|-------|--------|----------|-----------------|--------------------------------------------------------------------------------------------------------------------------------------------------------|-------|--------|----------|------------------------|
| UPPER LIMB | 1  | Interscalene brachial plexus block                                                                              | 98%   | 1%     | 1%       | INCLUDE         | Injection at the C5 and C6 nerve roots between anterior and middle scalene muscles                                                                     | 83%   | 10%    | 7%       | INCLUDE                |
|            | 2  | Superior trunk block                                                                                            | 92%   | 0%     | 8%       | INCLUDE         | Injection at the superior trunk before the suprascapular nerve emerges                                                                                 | 80%   | 6%     | 15%      | INCLUDE                |
|            | 3  | Supraclavicular brachial plexus block                                                                           | 99%   | 0%     | 1%       | INCLUDE         | Injection at the divisions of the brachial plexus<br>OR                                                                                                | 43%   | 14%    | 43%      | ROUND 3                |
|            | b  |                                                                                                                 |       |        |          |                 | Injection at the divisions of the brachial plexus immediately cephalad to the clavicle                                                                 | 63%   | 8%     | 29%      | ROUND 3                |
|            | 4  | Superficial cervical plexus block                                                                               | 98%   | 0%     | 2%       | INCLUDE         | Injection superficial to the investing fascia at the midpoint of the posterior border of sternocleidomastoid muscle                                    | 85%   | 2%     | 13%      | INCLUDE                |
|            | 5  | Deep cervical plexus block                                                                                      | 95%   | 2%     | 2%       | INCLUDE         | Injection adjacent to one of more of the transverse processes of C2, 3, and 4, (e.g. a paravertebral technique), deep to the prevertebral fascia<br>OR | 34%   | 24%    | 42%      | ROUND 3                |
|            | b  |                                                                                                                 |       |        |          |                 | Injection adjacent to one of more of the nerve roots of C2, 3, and 4, deep to the prevertebral fascia                                                  | 68%   | 9%     | 23%      | ROUND 3                |
|            | 6  | Intermediate cervical plexus block                                                                              | 68%   | 22%    | 10%      | ROUND 3         | Injection deep to the investing fascia at the midpoint of the posterior border of sternocleidomastoid muscle                                           | 62%   | 17%    | 21%      | ROUND 3                |
|            | 7  | Infraclavicular brachial plexus block<br>OR<br>Infraclavicular brachial plexus block (infraclavicular approach) | 82%   | 9%     | 10%      | INCLUDE         | Injection at the cords of the brachial plexus                                                                                                          | 87%   | 8%     | 6%       | INCLUDE                |
|            | b  |                                                                                                                 | 27%   | 7%     | 65%      | EXCLUDE         |                                                                                                                                                        |       |        |          |                        |
|            | 8  | Axillary brachial plexus block                                                                                  | 95%   | 0%     | 5%       | INCLUDE         | Injection at the branches of the brachial plexus at the level of the axilla<br>OR                                                                      | 60%   | 6%     | 33%      | ROUND 3                |
|            | b  |                                                                                                                 |       |        |          |                 | Injection at the branches of the brachial plexus in the axillary region                                                                                | 59%   | 7%     | 34%      | ROUND 3                |
|            | 9  | Axillary nerve block                                                                                            | 93%   | 2%     | 5%       | INCLUDE         | Injection of the axillary nerve in the upper humerus exiting the quadrangular space<br>OR                                                              | 56%   | 9%     | 35%      | ROUND 3                |
|            | b  |                                                                                                                 | 88%   | 3%     | 9%       |                 | Injection at the axillary nerve <SPECIFY LOCATION>                                                                                                     | 57%   | 10%    | 32%      | ROUND 3                |
|            | 10 | Midhumeral block<br>OR<br>Peripheral nerve block                                                                | 44%   | 11%    | 45%      | EXCLUDE         | Injection around the median, ulnar and radial nerves individually at the junction of the upper third and middle third of the arm.<br>OR                | 58%   | 1%     | 41%      | PNB                    |
|            | b  |                                                                                                                 | 55%   | 11%    | 34%      | WEAK CONSENSUS  | <NAME OF PERIPHERAL NERVE> block at the <LOCATION>                                                                                                     | 69%   | 7%     | 24%      | PNB                    |
|            | 11 | Suprascapular nerve block (anterior approach)<br>OR<br>Peripheral nerve block                                   | 87%   | 5%     | 8%       | INCLUDE         | Injection of the suprascapular nerve coming off superior trunk and travelling to posterior neck under the posterior belly of Omohyoid muscle<br>OR     | 84%   | 4%     | 12%      | INCLUDE                |
|            | b  |                                                                                                                 | 25%   | 8%     | 67%      | EXCLUDE         | <NAME OF PERIPHERAL NERVE> block at the <LOCATION>                                                                                                     | 26%   | 13%    | 61%      | EXCLUDE                |
|            | 12 | Suprascapular nerve (posterior approach)<br>OR<br>Peripheral nerve block                                        | 89%   | 2%     | 8%       | INCLUDE         | Injection of the suprascapular nerve in the suprascapular notch or suprascapular fossa<br>OR                                                           | 84%   | 8%     | 8%       | INCLUDE                |
|            | b  |                                                                                                                 | 22%   | 9%     | 69%      | EXCLUDE         | <NAME OF PERIPHERAL NERVE> block at the <LOCATION>                                                                                                     | 32%   | 12%    | 56%      | EXCLUDE                |
|            | 13 | Forearm block<br>OR                                                                                             | 39%   | 6%     | 55%      | EXCLUDE         | Injection of the median, ulnar, radial nerves at the level of elbow<br>OR                                                                              | 36%   | 7%     | 58%      | EXCLUDE                |

|        |    |                                                                  |      |     |     |                |                                                                                                                                                                                                                                                                                                                                                                                                    |                                                                                                                          |     |     |         |
|--------|----|------------------------------------------------------------------|------|-----|-----|----------------|----------------------------------------------------------------------------------------------------------------------------------------------------------------------------------------------------------------------------------------------------------------------------------------------------------------------------------------------------------------------------------------------------|--------------------------------------------------------------------------------------------------------------------------|-----|-----|---------|
|        | b  | Peripheral nerve block                                           | 68%  | 4%  | 29% | WEAK CONSENSUS | <NAME OF PERIPHERAL NERVE> block at the <LOCATION>                                                                                                                                                                                                                                                                                                                                                 | 70%                                                                                                                      | 5%  | 26% | PNB     |
|        | 14 | Infraclavicular brachial plexus block (Retroclavicular approach) | 78%  | 7%  | 15% | INCLUDE        | Injection at the cords of the brachial plexus                                                                                                                                                                                                                                                                                                                                                      | 64%                                                                                                                      | 10% | 26% | ROUND 3 |
|        | 15 | Infraclavicular brachial plexus block (Costoclavicular approach) | 85%  | 7%  | 8%  | INCLUDE        | Injection at the brachial plexus in the proximal infra-clavicular fossa, where the lateral, medial, and posterior cords are tightly bundled                                                                                                                                                                                                                                                        | 64%                                                                                                                      | 11% | 25% | ROUND 3 |
|        | b  |                                                                  |      |     |     |                | OR                                                                                                                                                                                                                                                                                                                                                                                                 | Injection at the cords of the brachial plexus                                                                            | 31% | 13% | 56%     |
|        | 16 | Wrist block                                                      | 47%  | 4%  | 49% | EXCLUDE        | Injection of the median, ulnar and radial nerves at the level of the wrist by separate injections                                                                                                                                                                                                                                                                                                  | 49%                                                                                                                      | 1%  | 49% | EXCLUDE |
|        | a  |                                                                  |      |     |     |                | OR                                                                                                                                                                                                                                                                                                                                                                                                 |                                                                                                                          |     |     |         |
|        | b  | Peripheral nerve block                                           | 64%  | 4%  | 32% | WEAK CONSENSUS | <NAME OF PERIPHERAL NERVE> block at the <LOCATION>                                                                                                                                                                                                                                                                                                                                                 | 62%                                                                                                                      | 5%  | 33% | PNB     |
|        | 17 | Intercostobrachial nerve block                                   | 84%  | 1%  | 15% | INCLUDE        | Injection 2-3 cm distal to the axillary crease in an anterior-posterior distribution approximately 3 - 5 cm wide between the biceps and the triceps muscles                                                                                                                                                                                                                                        | 56%                                                                                                                      | 11% | 33% | PNB     |
|        | a  |                                                                  |      |     |     |                | OR                                                                                                                                                                                                                                                                                                                                                                                                 |                                                                                                                          |     |     |         |
|        | b  | Peripheral nerve block                                           | 29%  | 4%  | 67% | EXCLUDE        | <NAME OF PERIPHERAL NERVE> block at the <LOCATION>                                                                                                                                                                                                                                                                                                                                                 | 42%                                                                                                                      | 6%  | 52% | PNB     |
| R LIMB | 18 | Lumbar plexus block                                              | 97%  | 1%  | 2%  | INCLUDE        | Injection at the level of the lumbar roots (L2-4) coursing in the posterior third of the psoas muscle                                                                                                                                                                                                                                                                                              | 95%                                                                                                                      | 0%  | 5%  | INCLUDE |
|        | 19 | Femoral nerve block                                              | 99%  | 0%  | 1%  | INCLUDE        | Injection of the femoral nerve cephalad to the bifurcation of the femoral artery, distal to the inguinal ligament and deep to both fascia lata and fascia iliaca, over the surface of the iliacus muscle.                                                                                                                                                                                          | 51%                                                                                                                      | 15% | 34% | ROUND 3 |
|        | b  |                                                                  |      |     |     |                | Injection of the femoral nerve cephalad to the bifurcation of the femoral artery, deep to the fascia iliaca                                                                                                                                                                                                                                                                                        | 64%                                                                                                                      | 7%  | 29% | ROUND 3 |
|        | 20 | Fascia iliaca block (supra-inguinal approach)                    | 98%  | 1%  | 1%  | INCLUDE        | Injection deep to the fascia iliaca over the surface of the iliacus muscle, superiorly and medially to the anterior superior iliac spine, proximal to the inguinal ligament.                                                                                                                                                                                                                       | 33%                                                                                                                      | 18% | 48% | EXCLUDE |
|        | b  |                                                                  |      |     |     |                | OR                                                                                                                                                                                                                                                                                                                                                                                                 | Injection deep to the fascia iliaca over the surface of the iliacus muscle, and proximal to the inguinal ligament.       | 78% | 3%  | 19%     |
|        | 21 | Fascia iliaca block (infra-inguinal approach)                    | 98%  | 1%  | 1%  | INCLUDE        | Injection deep to the fascia iliaca, over the surface of the iliacus muscle, and lateral to the femoral nerve, distal to the inguinal ligament.                                                                                                                                                                                                                                                    | 63%                                                                                                                      | 10% | 27% | ROUND 3 |
|        | b  |                                                                  |      |     |     |                | OR                                                                                                                                                                                                                                                                                                                                                                                                 | Injection deep to the fascia iliaca over the surface of the iliacus muscle, and distal to the inguinal ligament.         | 56% | 6%  | 38%     |
|        | 22 | Lateral femoral cutaneous nerve block                            | 100% | 0%  | 0%  | INCLUDE        | Injection at the lateral femoral cutaneous nerve medial to the tensor fascia lata and lateral to the sartorius muscle in a plane between the fascia lata and fascia iliaca, distal to the anterior superior iliac spine.                                                                                                                                                                           | 36%                                                                                                                      | 17% | 46% | ROUND 3 |
|        | b  |                                                                  |      |     |     |                | Injection at the lateral femoral cutaneous nerve medial to the tensor fascia lata and lateral to the sartorius muscle in a plane between the fascia lata and fascia iliaca.                                                                                                                                                                                                                        | 69%                                                                                                                      | 8%  | 22% | ROUND 3 |
|        | 23 | Posterior femoral cutaneous nerve block                          | 94%  | 2%  | 2%  | INCLUDE        | Injection at the posterior femoral cutaneous nerve superficial and lateral to the sciatic nerve in the subgluteal region, and immediately deep to the gluteus maximus and fascia lata.                                                                                                                                                                                                             | 35%                                                                                                                      | 23% | 42% | ROUND 3 |
|        | b  |                                                                  |      |     |     |                | OR                                                                                                                                                                                                                                                                                                                                                                                                 | Injection at the posterior femoral cutaneous nerve superficial and lateral to the sciatic nerve in the subgluteal region | 65% | 17% | 18%     |
|        | 24 | Obturator nerve block                                            | 93%  | 2%  | 5%  | INCLUDE        | Injection of the obturator nerve proximal to the bifurcation into anterior and posterior divisions in the plane between the pectineus and obturator externus muscles branches of the obturator nerve in the upper medial thigh as they lie anteriorly and posteriorly to the adductor brevis muscle respectively                                                                                   | 28%                                                                                                                      | 16% | 55% | ROUND 3 |
|        | b  |                                                                  |      |     |     |                | Injection of the obturator nerve proximal to the bifurcation into anterior and posterior divisions in the plane between the pectineus and obturator externus muscles                                                                                                                                                                                                                               | 68%                                                                                                                      | 14% | 18% | ROUND 3 |
|        | 25 | Genitofemoral nerve block                                        | 92%  | 2%  | 5%  | INCLUDE        | Injection of the genitofemoral nerve which is an oval structure lying medial and superficial to the femoral artery in the inguinal canal. The contents of the inguinal canal are identified , with testicular vessels located laterally and spermatic cord medially. The needle is advanced in an in-plane approach to direct the needle towards the spermatic cord to block the genital branch of | 19%                                                                                                                      | 15% | 66% | ROUND 3 |
|        | b  |                                                                  |      |     |     |                | Injection of the genitofemoral nerve which is an oval structure lying medial and superficial to the femoral artery in the inguinal canal.                                                                                                                                                                                                                                                          | 65%                                                                                                                      | 15% | 20% | ROUND 3 |
|        | 26 | Femoral triangle block                                           | 76%  | 10% | 14% | INCLUDE        | Injection in the aponeurotic compartment containing the femoral vessels proximal to the apex of the femoral triangle. The apex of the femoral triangle is the point where the medial borders of the sartorius and adductor longus muscles cross.                                                                                                                                                   | 77%                                                                                                                      | 11% | 12% | INCLUDE |

|       |    |   |                                                                  |     |     |     |         |                                                                                                                                                                                                                                                                                                                                                                    |     |     |     |         |
|-------|----|---|------------------------------------------------------------------|-----|-----|-----|---------|--------------------------------------------------------------------------------------------------------------------------------------------------------------------------------------------------------------------------------------------------------------------------------------------------------------------------------------------------------------------|-----|-----|-----|---------|
| LOWER | 27 | a | Saphenous nerve block at the knee<br>OR                          | 26% | 11% | 63% | ROUND 3 | Injection of the saphenous nerve deep to the sartorius muscle and posterior to the saphenous branch of the descending genicular artery                                                                                                                                                                                                                             | 52% | 11% | 37% | ROUND 3 |
|       |    | b | Saphenous nerve block (at the level of the adductor canal)<br>OR | 57% | 7%  | 35% | ROUND 3 |                                                                                                                                                                                                                                                                                                                                                                    | 49% | 11% | 40% | ROUND 3 |
|       |    | c | Peripheral nerve block                                           | 46% | 5%  | 49% | ROUND 3 | <NAME OF PERIPHERAL NERVE> block at the <LOCATION>                                                                                                                                                                                                                                                                                                                 | 45% | 8%  | 47% | ROUND 3 |
|       | 28 | a | Pericapsular nerve group (PENG) block                            | 77% | 9%  | 14% | INCLUDE | The ilio-pubic eminence (IPE), the iliopsoas muscle and tendon, the femoral artery, and pectineus muscle are imaged. Injection in the musculofascial plane between the psoas tendon anteriorly and the pubic ramus posteriorly.                                                                                                                                    | 31% | 19% | 50% | ROUND 3 |
|       |    | b |                                                                  |     |     |     |         | Injection in the musculofascial plane between the psoas tendon anteriorly and the pubic ramus posteriorly.                                                                                                                                                                                                                                                         | 68% | 8%  | 24% | ROUND 3 |
|       | 29 |   | Sacral plexus block                                              | 87% | 8%  | 5%  | INCLUDE | Injection of the the sacral plexus just medial to the posterior border of the ischium. The plexus lies deep to the piriformis muscle lateral to the inferior gluteal vessels.                                                                                                                                                                                      | 79% | 11% | 11% | INCLUDE |
|       | 30 |   | Sciatic nerve block (Transgluteal approach)                      | 90% | 7%  | 3%  | INCLUDE | Injection of the sciatic nerve deep to the gluteus maximus muscle.                                                                                                                                                                                                                                                                                                 | 96% | 1%  | 3%  | INCLUDE |
|       | 31 | a | Sciatic nerve block (Infragluteal approach)                      | 86% | 7%  | 7%  | INCLUDE | Injection of the sciatic nerve at the midhigh region distal to the inferior border of the gluteus maximus muscle.                                                                                                                                                                                                                                                  | 87% | 5%  | 8%  | INCLUDE |
|       | 32 |   | Sciatic nerve block (Anterior approach)                          | 94% | 5%  | 1%  | INCLUDE | Injection of the sciatic nerve between the adductor magnus anteriorly and gluteus maximus or biceps femoris muscles.                                                                                                                                                                                                                                               | 93% | 3%  | 4%  | INCLUDE |
|       | 33 | a | Popliteal sciatic nerve block<br>OR                              | 54% | 11% | 35% | ROUND 3 | Injection of the sciatic nerve at or near the point of bifurcation in the popliteal fossa                                                                                                                                                                                                                                                                          | 91% | 1%  | 8%  | INCLUDE |
|       |    | b | Sciatic nerve block at the popliteal fossa                       | 58% | 7%  | 35% | ROUND 3 |                                                                                                                                                                                                                                                                                                                                                                    | 86% | 0%  | 14% | INCLUDE |
|       | 34 | a | Selective tibial nerve block<br>OR                               | 39% | 10% | 51% | ROUND 3 | Injection of the tibial nerve distal to the sciatic nerve bifurcation                                                                                                                                                                                                                                                                                              | 96% | 3%  | 1%  | INCLUDE |
|       |    | b | Tibial nerve block at the popliteal fossa                        | 73% | 7%  | 19% | ROUND 3 |                                                                                                                                                                                                                                                                                                                                                                    |     |     |     |         |
|       | 35 | a | Posterior tibial nerve block<br>OR                               | 26% | 8%  | 66% | EXCLUDE | Injection of the posterior tibial nerve proximal to medial malleolus, the tendons of the tibialis anterior and flexor digitorum profundus are anterior to the nerve and gastrocnemius-soleus posterior to it. The posterior tibial artery and the tendon of flexor hallucis longus lie deep to the nerve, often with two small veins on either side of the artery. | 39% | 6%  | 55% | ROUND 3 |
|       |    | b | Tibial nerve block at the ankle                                  | 81% | 5%  | 14% | INCLUDE | Injection at the tibial nerve proximal to medial malleolus, the tendons of the tibialis anterior and flexor digitorum profundus are anterior to the nerve and gastrocnemius-soleus posterior to it. The posterior tibial artery and the tendon of flexor hallucis longus lie deep to the nerve, often with two small veins on either side of the artery.           | 60% | 9%  | 31% | ROUND 3 |
|       | 36 |   | Nerve to vastus medialis block                                   | 84% | 8%  | 7%  | INCLUDE | Injection of the nerve to vastus medialis where it is located deep to the sartorius and lateral to the saphenous nerve and femoral vessels in the femoral triangle                                                                                                                                                                                                 | 79% | 13% | 8%  | INCLUDE |

Source: Author's calculations.

|  |  | DATE |  | TIME |  | DAY |  | WEEK |  | MONTH |  | YEAR |  | DECADE |  | CENTURY |  | MILLENNIUM |  | ERAS |  | EPOCHS |  | AGES |  | PERIODS |  | PHASES |  | STAGES |  | CYCLES |  | SPANS |  | DURATION |  | INTERVAL |  | FREQUENCY |  | PATTERN |  | TRENDS |  | FLUCTUATION |  | VARIATION |  | ANOMALY |  | OUTLIER |  | EXTREME |  | CRITICAL |  | POTENTIAL |  | RISK |  | UNCERTAINTY |  | SUSCEPTIBILITY |  | VULNERABILITY |  | RESILIENCE |  | ADAPTABILITY |  | FLEXIBILITY |  | AGILITY |  | DYNAMICITY |  | EVOLVABILITY |  | TRANSFORMABILITY |  | SCALABILITY |  | GROWTH |  | DEVELOPMENT |  | PROGRESS |  | ACHIEVEMENT |  | REALIZATION |  | FULFILLMENT |  | COMPLETION |  | SATISFACTION |  | CONTENTMENT |  | PEACE |  | HARMONY |  | BALANCE |  | EQUILIBRIUM |  | STABILITY |  | SECURITY |  | PROTECTION |  | DEFENSE |  | OFFENSE |  | ATTACK |  | DEFENSE |  | WAR |  | PEACE |  | CONFLICT |  | RESOLUTION |  | SETTLEMENT |  | AGREEMENT |  | TREATY |  | PACT |  | COVENANT |  | ALLIANCE |  | COOPERATION |  | COLLABORATION |  | PARTNERSHIP |  | JOINT VENTURE |  | CONSORTIUM |  | CONGLOMERATE |  | CORPORATION |  | ENTERPRISE |  | BUSINESS |  | INDUSTRY |  | SECTOR |  | MARKET |  | ECONOMY |  | FINANCE |  | CURRENCY |  | CREDIT |  | DEBT |  | INVESTMENT |  | CAPITAL |  | LABOR |  | MANPOWER |  | TECHNOLOGY |  | INNOVATION |  | RESEARCH |  | DEVELOPMENT |  | PROGRESS |  | ACHIEVEMENT |  | REALIZATION |  | FULFILLMENT |  | COMPLETION |  | SATISFACTION |  | CONTENTMENT |  | PEACE |  | HARMONY |  | BALANCE |  | EQUILIBRIUM |  | STABILITY |  | SECURITY |  | PROTECTION |  | DEFENSE |  | OFFENSE |  | ATTACK |  | DEFENSE |  | WAR |  | PEACE |  | CONFLICT |  | RESOLUTION |  | SETTLEMENT |  | AGREEMENT |  | TREATY |  | PACT |  | COVENANT |  | ALLIANCE |  | COOPERATION |  | COLLABORATION |  | PARTNERSHIP |  | JOINT VENTURE |  | CONSORTIUM |  | CONGLOMERATE |  | CORPORATION |  | ENTERPRISE |  | BUSINESS |  | INDUSTRY |  | SECTOR |  | MARKET |  | ECONOMY |  | FINANCE |  | CURRENCY |  | CREDIT |  | DEBT |  | INVESTMENT |  | CAPITAL |  | LABOR |  | MANPOWER |  | TECHNOLOGY |  | INNOVATION |  | RESEARCH |  | DEVELOPMENT |  | PROGRESS |  | ACHIEVEMENT |  | REALIZATION |  | FULFILLMENT |  | COMPLETION |  | SATISFACTION |  | CONTENTMENT |  | PEACE |  | HARMONY |  | BALANCE |  | EQUILIBRIUM |  | STABILITY |  | SECURITY |  | PROTECTION |  | DEFENSE |  | OFFENSE |  | ATTACK |  | DEFENSE |  | WAR |  | PEACE |  | CONFLICT |  | RESOLUTION |  | SETTLEMENT |  | AGREEMENT |  | TREATY |  | PACT |  | COVENANT |  | ALLIANCE |  | COOPERATION |  | COLLABORATION |  | PARTNERSHIP |  | JOINT VENTURE |  | CONSORTIUM |  | CONGLOMERATE |  | CORPORATION |  | ENTERPRISE |  | BUSINESS |  | INDUSTRY |  | SECTOR |  | MARKET |  | ECONOMY |  | FINANCE |  | CURRENCY |  | CREDIT |  | DEBT |  | INVESTMENT |  | CAPITAL |  | LABOR |  | MANPOWER |  | TECHNOLOGY |  | INNOVATION |  | RESEARCH |  | DEVELOPMENT |  | PROGRESS |  | ACHIEVEMENT |  | REALIZATION |  | FULFILLMENT |  | COMPLETION |  | SATISFACTION |  | CONTENTMENT |  | PEACE |  | HARMONY |  | BALANCE |  | EQUILIBRIUM |  | STABILITY |  | SECURITY |  | PROTECTION |  | DEFENSE |  | OFFENSE |  | ATTACK |  | DEFENSE |  | WAR |  | PEACE |  | CONFLICT |  | RESOLUTION |  | SETTLEMENT |  | AGREEMENT |  | TREATY |  | PACT |  | COVENANT |  | ALLIANCE |  | COOPERATION |  | COLLABORATION |  | PARTNERSHIP |  | JOINT VENTURE |  | CONSORTIUM |  | CONGLOMERATE |  | CORPORATION |  | ENTERPRISE |  | BUSINESS |  | INDUSTRY |  | SECTOR |  | MARKET |  | ECONOMY |  | FINANCE |  | CURRENCY |  | CREDIT |  | DEBT |  | INVESTMENT |  | CAPITAL |  | LABOR |  | MANPOWER |  | TECHNOLOGY |  | INNOVATION |  | RESEARCH |  | DEVELOPMENT |  | PROGRESS |  | ACHIEVEMENT |  | REALIZATION |  | FULFILLMENT |  | COMPLETION |  | SATISFACTION |  | CONTENTMENT |  | PEACE |  | HARMONY |  | BALANCE |  | EQUILIBRIUM |  | STABILITY |  | SECURITY |  | PROTECTION |  | DEFENSE |  | OFFENSE |  | ATTACK |  | DEFENSE |  | WAR |  | PEACE |  | CONFLICT |  | RESOLUTION |  | SETTLEMENT |  | AGREEMENT |  | TREATY |  | PACT |  | COVENANT |  | ALLIANCE |  | COOPERATION |  | COLLABORATION |  | PARTNERSHIP |  | JOINT VENTURE |  | CONSORTIUM |  | CONGLOMERATE |  | CORPORATION |  | ENTERPRISE |  | BUSINESS |  | INDUSTRY |  | SECTOR |  | MARKET |  | ECONOMY |  | FINANCE |  | CURRENCY |  | CREDIT |  | DEBT |  | INVESTMENT |  | CAPITAL |  | LABOR |  | MANPOWER |  | TECHNOLOGY |  | INNOVATION |  | RESEARCH |  | DEVELOPMENT |  | PROGRESS |  | ACHIEVEMENT |  | REALIZATION |  | FULFILLMENT |  | COMPLETION |  | SATISFACTION |  | CONTENTMENT |  | PEACE |  | HARMONY |  | BALANCE |  | EQUILIBRIUM |  | STABILITY |  | SECURITY |  | PROTECTION |  | DEFENSE |  | OFFENSE |  | ATTACK |  | DEFENSE |  | WAR |  | PEACE |  | CONFLICT |  | RESOLUTION |  | SETTLEMENT |  | AGREEMENT |  | TREATY |  | PACT |  | COVENANT |  | ALLIANCE |  | COOPERATION |  | COLLABORATION |  | PARTNERSHIP |  | JOINT VENTURE |  | CONSORTIUM |  | CONGLOMERATE |  | CORPORATION |  | ENTERPRISE |  | BUSINESS |  | INDUSTRY |  | SECTOR |  | MARKET |  | ECONOMY |  | FINANCE |  | CURRENCY |  | CREDIT |  | DEBT |  | INVESTMENT |  | CAPITAL |  | LABOR |  | MANPOWER |  | TECHNOLOGY |  | INNOVATION |  | RESEARCH |  | DEVELOPMENT |  | PROGRESS |  | ACHIEVEMENT |  | REALIZATION |  | FULFILLMENT |  | COMPLETION |  | SATISFACTION |  | CONTENTMENT |  | PEACE |  | HARMONY |  | BALANCE |  | EQUILIBRIUM |  | STABILITY |  | SECURITY |  | PROTECTION |  | DEFENSE |  | OFFENSE |  | ATTACK |  | DEFENSE |  | WAR</ |  |
|--|--|------|--|------|--|-----|--|------|--|-------|--|------|--|--------|--|---------|--|------------|--|------|--|--------|--|------|--|---------|--|--------|--|--------|--|--------|--|-------|--|----------|--|----------|--|-----------|--|---------|--|--------|--|-------------|--|-----------|--|---------|--|---------|--|---------|--|----------|--|-----------|--|------|--|-------------|--|----------------|--|---------------|--|------------|--|--------------|--|-------------|--|---------|--|------------|--|--------------|--|------------------|--|-------------|--|--------|--|-------------|--|----------|--|-------------|--|-------------|--|-------------|--|------------|--|--------------|--|-------------|--|-------|--|---------|--|---------|--|-------------|--|-----------|--|----------|--|------------|--|---------|--|---------|--|--------|--|---------|--|-----|--|-------|--|----------|--|------------|--|------------|--|-----------|--|--------|--|------|--|----------|--|----------|--|-------------|--|---------------|--|-------------|--|---------------|--|------------|--|--------------|--|-------------|--|------------|--|----------|--|----------|--|--------|--|--------|--|---------|--|---------|--|----------|--|--------|--|------|--|------------|--|---------|--|-------|--|----------|--|------------|--|------------|--|----------|--|-------------|--|----------|--|-------------|--|-------------|--|-------------|--|------------|--|--------------|--|-------------|--|-------|--|---------|--|---------|--|-------------|--|-----------|--|----------|--|------------|--|---------|--|---------|--|--------|--|---------|--|-----|--|-------|--|----------|--|------------|--|------------|--|-----------|--|--------|--|------|--|----------|--|----------|--|-------------|--|---------------|--|-------------|--|---------------|--|------------|--|--------------|--|-------------|--|------------|--|----------|--|----------|--|--------|--|--------|--|---------|--|---------|--|----------|--|--------|--|------|--|------------|--|---------|--|-------|--|----------|--|------------|--|------------|--|----------|--|-------------|--|----------|--|-------------|--|-------------|--|-------------|--|------------|--|--------------|--|-------------|--|-------|--|---------|--|---------|--|-------------|--|-----------|--|----------|--|------------|--|---------|--|---------|--|--------|--|---------|--|-----|--|-------|--|----------|--|------------|--|------------|--|-----------|--|--------|--|------|--|----------|--|----------|--|-------------|--|---------------|--|-------------|--|---------------|--|------------|--|--------------|--|-------------|--|------------|--|----------|--|----------|--|--------|--|--------|--|---------|--|---------|--|----------|--|--------|--|------|--|------------|--|---------|--|-------|--|----------|--|------------|--|------------|--|----------|--|-------------|--|----------|--|-------------|--|-------------|--|-------------|--|------------|--|--------------|--|-------------|--|-------|--|---------|--|---------|--|-------------|--|-----------|--|----------|--|------------|--|---------|--|---------|--|--------|--|---------|--|-----|--|-------|--|----------|--|------------|--|------------|--|-----------|--|--------|--|------|--|----------|--|----------|--|-------------|--|---------------|--|-------------|--|---------------|--|------------|--|--------------|--|-------------|--|------------|--|----------|--|----------|--|--------|--|--------|--|---------|--|---------|--|----------|--|--------|--|------|--|------------|--|---------|--|-------|--|----------|--|------------|--|------------|--|----------|--|-------------|--|----------|--|-------------|--|-------------|--|-------------|--|------------|--|--------------|--|-------------|--|-------|--|---------|--|---------|--|-------------|--|-----------|--|----------|--|------------|--|---------|--|---------|--|--------|--|---------|--|-----|--|-------|--|----------|--|------------|--|------------|--|-----------|--|--------|--|------|--|----------|--|----------|--|-------------|--|---------------|--|-------------|--|---------------|--|------------|--|--------------|--|-------------|--|------------|--|----------|--|----------|--|--------|--|--------|--|---------|--|---------|--|----------|--|--------|--|------|--|------------|--|---------|--|-------|--|----------|--|------------|--|------------|--|----------|--|-------------|--|----------|--|-------------|--|-------------|--|-------------|--|------------|--|--------------|--|-------------|--|-------|--|---------|--|---------|--|-------------|--|-----------|--|----------|--|------------|--|---------|--|---------|--|--------|--|---------|--|-----|--|-------|--|----------|--|------------|--|------------|--|-----------|--|--------|--|------|--|----------|--|----------|--|-------------|--|---------------|--|-------------|--|---------------|--|------------|--|--------------|--|-------------|--|------------|--|----------|--|----------|--|--------|--|--------|--|---------|--|---------|--|----------|--|--------|--|------|--|------------|--|---------|--|-------|--|----------|--|------------|--|------------|--|----------|--|-------------|--|----------|--|-------------|--|-------------|--|-------------|--|------------|--|--------------|--|-------------|--|-------|--|---------|--|---------|--|-------------|--|-----------|--|----------|--|------------|--|---------|--|---------|--|--------|--|---------|--|-------|--|
|--|--|------|--|------|--|-----|--|------|--|-------|--|------|--|--------|--|---------|--|------------|--|------|--|--------|--|------|--|---------|--|--------|--|--------|--|--------|--|-------|--|----------|--|----------|--|-----------|--|---------|--|--------|--|-------------|--|-----------|--|---------|--|---------|--|---------|--|----------|--|-----------|--|------|--|-------------|--|----------------|--|---------------|--|------------|--|--------------|--|-------------|--|---------|--|------------|--|--------------|--|------------------|--|-------------|--|--------|--|-------------|--|----------|--|-------------|--|-------------|--|-------------|--|------------|--|--------------|--|-------------|--|-------|--|---------|--|---------|--|-------------|--|-----------|--|----------|--|------------|--|---------|--|---------|--|--------|--|---------|--|-----|--|-------|--|----------|--|------------|--|------------|--|-----------|--|--------|--|------|--|----------|--|----------|--|-------------|--|---------------|--|-------------|--|---------------|--|------------|--|--------------|--|-------------|--|------------|--|----------|--|----------|--|--------|--|--------|--|---------|--|---------|--|----------|--|--------|--|------|--|------------|--|---------|--|-------|--|----------|--|------------|--|------------|--|----------|--|-------------|--|----------|--|-------------|--|-------------|--|-------------|--|------------|--|--------------|--|-------------|--|-------|--|---------|--|---------|--|-------------|--|-----------|--|----------|--|------------|--|---------|--|---------|--|--------|--|---------|--|-----|--|-------|--|----------|--|------------|--|------------|--|-----------|--|--------|--|------|--|----------|--|----------|--|-------------|--|---------------|--|-------------|--|---------------|--|------------|--|--------------|--|-------------|--|------------|--|----------|--|----------|--|--------|--|--------|--|---------|--|---------|--|----------|--|--------|--|------|--|------------|--|---------|--|-------|--|----------|--|------------|--|------------|--|----------|--|-------------|--|----------|--|-------------|--|-------------|--|-------------|--|------------|--|--------------|--|-------------|--|-------|--|---------|--|---------|--|-------------|--|-----------|--|----------|--|------------|--|---------|--|---------|--|--------|--|---------|--|-----|--|-------|--|----------|--|------------|--|------------|--|-----------|--|--------|--|------|--|----------|--|----------|--|-------------|--|---------------|--|-------------|--|---------------|--|------------|--|--------------|--|-------------|--|------------|--|----------|--|----------|--|--------|--|--------|--|---------|--|---------|--|----------|--|--------|--|------|--|------------|--|---------|--|-------|--|----------|--|------------|--|------------|--|----------|--|-------------|--|----------|--|-------------|--|-------------|--|-------------|--|------------|--|--------------|--|-------------|--|-------|--|---------|--|---------|--|-------------|--|-----------|--|----------|--|------------|--|---------|--|---------|--|--------|--|---------|--|-----|--|-------|--|----------|--|------------|--|------------|--|-----------|--|--------|--|------|--|----------|--|----------|--|-------------|--|---------------|--|-------------|--|---------------|--|------------|--|--------------|--|-------------|--|------------|--|----------|--|----------|--|--------|--|--------|--|---------|--|---------|--|----------|--|--------|--|------|--|------------|--|---------|--|-------|--|----------|--|------------|--|------------|--|----------|--|-------------|--|----------|--|-------------|--|-------------|--|-------------|--|------------|--|--------------|--|-------------|--|-------|--|---------|--|---------|--|-------------|--|-----------|--|----------|--|------------|--|---------|--|---------|--|--------|--|---------|--|-----|--|-------|--|----------|--|------------|--|------------|--|-----------|--|--------|--|------|--|----------|--|----------|--|-------------|--|---------------|--|-------------|--|---------------|--|------------|--|--------------|--|-------------|--|------------|--|----------|--|----------|--|--------|--|--------|--|---------|--|---------|--|----------|--|--------|--|------|--|------------|--|---------|--|-------|--|----------|--|------------|--|------------|--|----------|--|-------------|--|----------|--|-------------|--|-------------|--|-------------|--|------------|--|--------------|--|-------------|--|-------|--|---------|--|---------|--|-------------|--|-----------|--|----------|--|------------|--|---------|--|---------|--|--------|--|---------|--|-----|--|-------|--|----------|--|------------|--|------------|--|-----------|--|--------|--|------|--|----------|--|----------|--|-------------|--|---------------|--|-------------|--|---------------|--|------------|--|--------------|--|-------------|--|------------|--|----------|--|----------|--|--------|--|--------|--|---------|--|---------|--|----------|--|--------|--|------|--|------------|--|---------|--|-------|--|----------|--|------------|--|------------|--|----------|--|-------------|--|----------|--|-------------|--|-------------|--|-------------|--|------------|--|--------------|--|-------------|--|-------|--|---------|--|---------|--|-------------|--|-----------|--|----------|--|------------|--|---------|--|---------|--|--------|--|---------|--|-------|--|

El-Boghdadly K, *et al.* *Reg Anesth Pain Med* 2023;0:1–11. doi: 10.1136/rapm-2023-104884

El-Boghdadly K, *et al.* *Reg Anesth Pain Med* 2023;0:1–11. doi: 10.1136/rapm-2023-104884

El-Boghdadly K, *et al. Reg Anesth Pain Med* 2023;0:1–11. doi: 10.1136/rapm-2023-104884

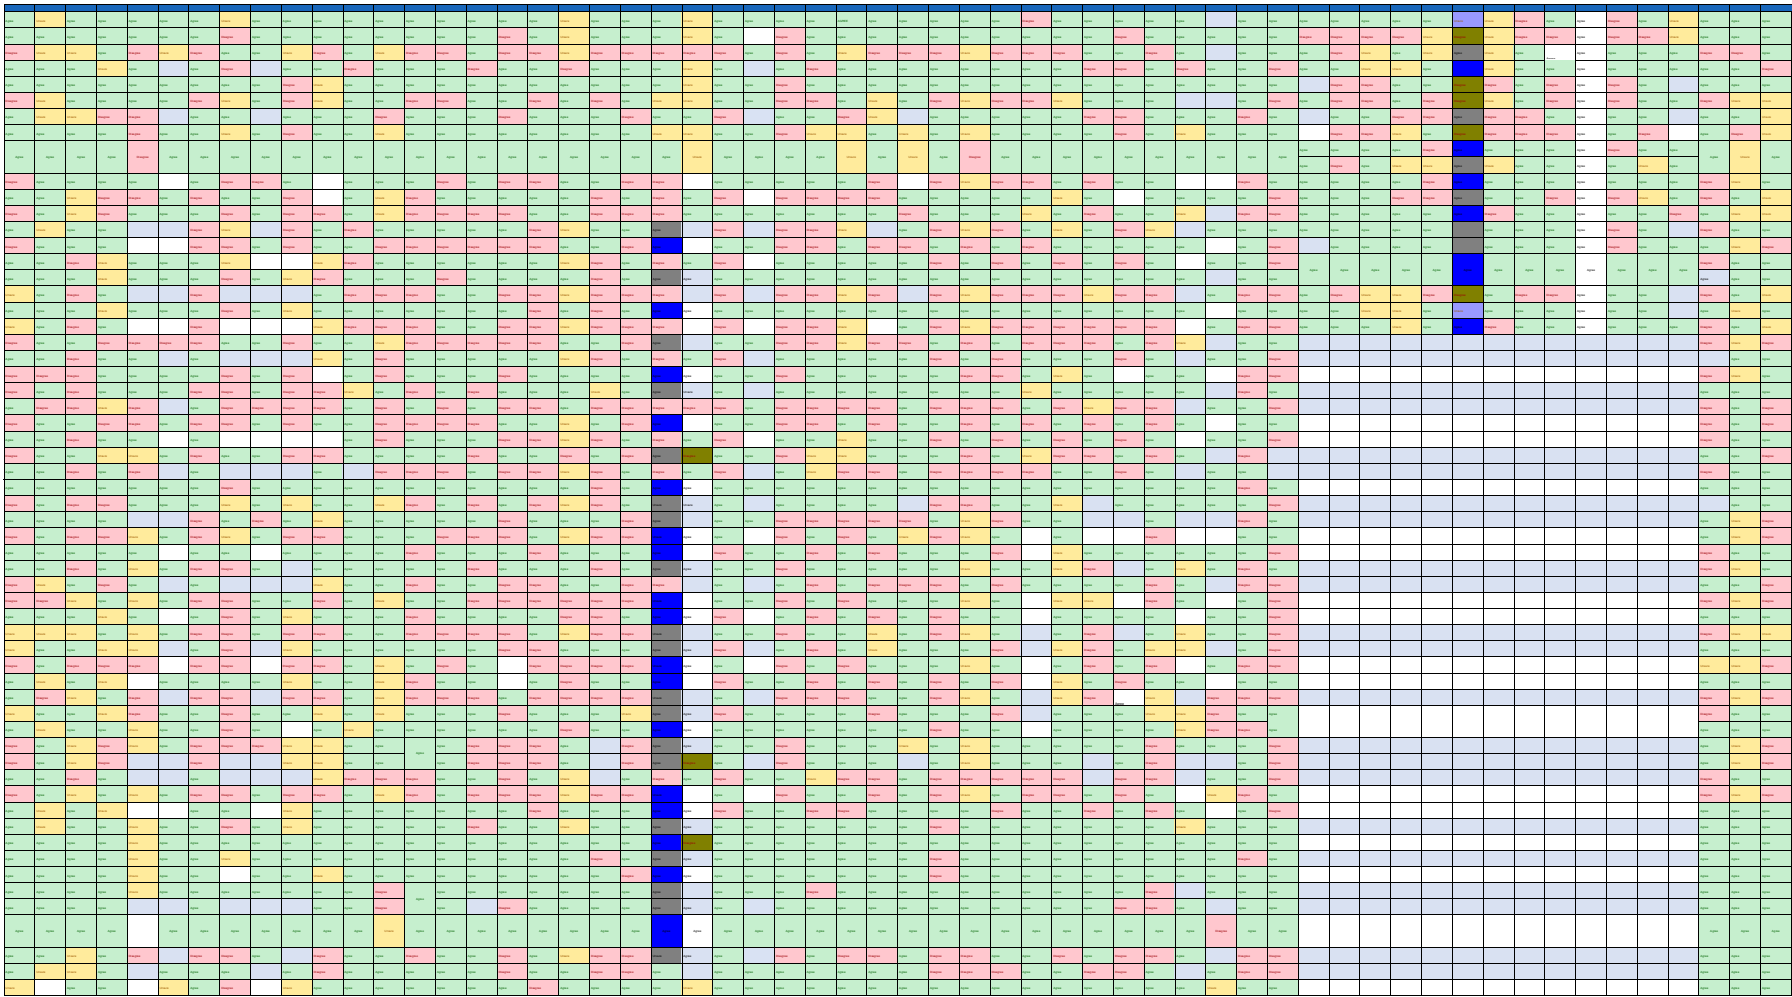



El-Boghdadly K, *et al.* *Reg Anesth Pain Med* 2023;0:1–11. doi: 10.1136/rapm-2023-104884

| Project Information |                           |           |           |            |            |        |             |          |     | Financial Data |        |                |               |               |             |                  |            |                         |        | Operational Metrics |          |           |             |            |            |                         |  |  |  | Compliance & Risk |  |  |  |  |  |  |  |  |  |
|---------------------|---------------------------|-----------|-----------|------------|------------|--------|-------------|----------|-----|----------------|--------|----------------|---------------|---------------|-------------|------------------|------------|-------------------------|--------|---------------------|----------|-----------|-------------|------------|------------|-------------------------|--|--|--|-------------------|--|--|--|--|--|--|--|--|--|
| Project ID          | Name                      | Manager   | Status    | Start Date | End Date   | Budget | Actual Cost | Variance | ROI | Revenue        | Profit | Units Produced | Quality Score | Customer Sat. | Defect Rate | Compliance Score | Risk Level | Mitigation Strategy     | Impact | Frequency           | Severity | Owner     | Assigned To | Due Date   | Progress % | Notes                   |  |  |  |                   |  |  |  |  |  |  |  |  |  |
| P001                | New Product Launch        | J. Doe    | On Track  | 2023-01-15 | 2023-06-30 | \$1.2M | \$1.15M     | \$50K    | 15% | \$2.5M         | \$1.8M | 120,000        | 92%           | 4.5/5         | 0.5%        | 95%              | Low        | Regular audits          | Minor  | Quarterly           | Medium   | J. Doe    | A. Smith    | 2023-07-15 | 85%        | Initial phase complete  |  |  |  |                   |  |  |  |  |  |  |  |  |  |
| P002                | Website Redesign          | M. Chen   | Delayed   | 2023-02-01 | 2023-08-31 | \$800K | \$850K      | -\$50K   | 10% | \$1.8M         | \$1.5M | 80,000         | 88%           | 4.2/5         | 0.8%        | 90%              | Medium     | Resource allocation     | Minor  | Monthly             | High     | M. Chen   | B. Lee      | 2023-09-10 | 60%        | Design phase delayed    |  |  |  |                   |  |  |  |  |  |  |  |  |  |
| P003                | IT System Upgrade         | K. Patel  | On Track  | 2023-03-10 | 2023-09-30 | \$950K | \$920K      | \$30K    | 12% | \$2.1M         | \$1.6M | 95,000         | 90%           | 4.3/5         | 0.6%        | 92%              | Low        | Vendor management       | Minor  | Quarterly           | Medium   | K. Patel  | C. Garcia   | 2023-10-05 | 70%        | Testing phase ongoing   |  |  |  |                   |  |  |  |  |  |  |  |  |  |
| P004                | Marketing Campaign        | L. Kim    | Completed | 2023-01-01 | 2023-05-31 | \$300K | \$310K      | -\$10K   | 20% | \$1.0M         | \$0.7M | 50,000         | 95%           | 4.8/5         | 0.2%        | 98%              | Low        | Performance tracking    | Minor  | Weekly              | Low      | L. Kim    | D. Brown    | 2023-06-15 | 100%       | Campaign successful     |  |  |  |                   |  |  |  |  |  |  |  |  |  |
| P005                | Supply Chain Optimization | N. Singh  | On Track  | 2023-04-01 | 2023-10-31 | \$1.1M | \$1.08M     | \$20K    | 18% | \$2.3M         | \$1.7M | 110,000        | 91%           | 4.4/5         | 0.7%        | 93%              | Medium     | Supplier negotiations   | Minor  | Quarterly           | Medium   | N. Singh  | E. White    | 2023-11-10 | 55%        | Analysis phase complete |  |  |  |                   |  |  |  |  |  |  |  |  |  |
| P006                | HR System Implementation  | O. Wilson | Delayed   | 2023-05-15 | 2023-11-30 | \$700K | \$750K      | -\$50K   | 8%  | \$1.5M         | \$1.2M | 70,000         | 85%           | 4.0/5         | 1.0%        | 88%              | Medium     | Training programs       | Minor  | Monthly             | High     | O. Wilson | F. Green    | 2023-12-05 | 40%        | Rollout phase delayed   |  |  |  |                   |  |  |  |  |  |  |  |  |  |
| P007                | Research & Development    | P. Adams  | On Track  | 2023-06-01 | 2024-03-31 | \$1.5M | \$1.45M     | \$50K    | 22% | \$3.0M         | \$2.2M | 130,000        | 93%           | 4.6/5         | 0.4%        | 96%              | Low        | Patent applications     | Minor  | Quarterly           | Medium   | P. Adams  | G. Black    | 2024-04-15 | 30%        | Concept phase ongoing   |  |  |  |                   |  |  |  |  |  |  |  |  |  |
| P008                | Facility Expansion        | Q. Evans  | On Track  | 2023-07-10 | 2024-01-31 | \$1.8M | \$1.75M     | \$50K    | 19% | \$3.5M         | \$2.5M | 150,000        | 94%           | 4.7/5         | 0.3%        | 97%              | Low        | Construction management | Minor  | Quarterly           | Medium   | Q. Evans  | H. Blue     | 2024-02-10 | 25%        | Site selection complete |  |  |  |                   |  |  |  |  |  |  |  |  |  |
| P009                | Customer Service Training | R. Harris | Completed | 2023-08-01 | 2023-10-31 | \$250K | \$260K      | -\$10K   | 25% | \$1.2M         | \$0.9M | 60,000         | 96%           | 4.9/5         | 0.1%        | 99%              | Low        | Feedback collection     | Minor  | Weekly              | Low      | R. Harris | I. Yellow   | 2023-11-15 | 100%       | Training effective      |  |  |  |                   |  |  |  |  |  |  |  |  |  |
| P010                | Legal Review              | S. King   | On Track  | 2023-09-01 | 2023-12-31 | \$100K | \$95K       | \$5K     | 30% | \$0.5M         | \$0.4M | 20,000         | 97%           | 5.0/5         | 0.0%        | 100%             | Low        | Compliance checks       | Minor  | Monthly             | Low      | S. King   | J. Purple   | 2024-01-05 | 15%        | Review phase ongoing    |  |  |  |                   |  |  |  |  |  |  |  |  |  |

|                       |                         | Yes                                                                                                                          | Unsure | No |
|-----------------------|-------------------------|------------------------------------------------------------------------------------------------------------------------------|--------|----|
| CLARIFYING QUESTION 1 | PERIPHERAL NERVE BLOCKS | Should this Delphi study achieve consensus for names and anatomical descriptions of every individual peripheral nerve block? |        |    |
|                       |                         | 42                                                                                                                           | 10     | 32 |
|                       |                         | Yes                                                                                                                          | Unsure | No |
| CLARIFYING QUESTION 2 | PERIPHERAL NERVE BLOCKS | Should names be presented as <NAME OF NERVE> block at the <LOCATION>                                                         |        |    |
|                       |                         | 64                                                                                                                           | 13     | 7  |

**Are there any further comments or suggestions you would like to make?**

I would change the language of the question to (Should this Delphi study achieve consensus for names and anatomical descriptions of every individual peripheral nerve block in every single location?), if this is the case, I would say ( YES, AGREE)

No - thanks for all the hard work team!

I think given the broad, expert nature of this study, a definitive conclusion ought to be reached for all blocks

Add back adductor canal block as it is it widely used and the name is descriptive enough and accurate - variable nerve branches found there and local spreads variable to even more beyond site of injection; also, please, consider including back IPACK, possibly under another name "posterior knee pericapsular block" similar to the suggestion for a better PENG block name (with all my respect to Philipp and Sanjay, respectively!)

We should limit the descriptions of how the scanning is performed and what structures should be seen to orientate one's self. The block descriptions should simply refer to the structures targeted.

The use of "peripheralnerve" as a descriptor is appropriate for most small peripheral nerves that are usually part of a multi-nerve approach. When the peripheral nerve is important enough as a single intervention, it is OK to name it. E.g.: Femoral nerve block and sciatic nerve block.

Unfortunately the introduction of ultrasound has led to a blending of the various blocks we perform and these descriptions often only serve as guide to the ultimate needle position. We need to ensure clarity of desired effect and match our early landmark approaches to this desired effect very often in clinical practice.

This Delphi survey does not have to include every single one of the peripheral nerve block but the majority of it which are widely used. Those blocks presented as name of nerve block at the location should be the ones which have several locations that can commonly be blocked eg. sciatic, infraclavicular and fascia iliaca blocks.

Some of the descriptions are very detailed and wordy. Is it possible to refine the descriptions without losing the message?

No, this is coming together nicely

I would suggest to add the following block: NAME: "Cervical supraclavicular nerve block" DESCRIPTION: Injection on the cervical supraclavicular nerve or its branches at the level C6/C7 superficial to scalenus medius or scalenus anterior muscles and superficial to cervical investing fascia

If we are going to the extent of defining the axillary nerve block, intercostobrachial nerve block, and other peripheral nerves in isolation, should we consider inclusion of musculocutaneous nerve block and medial brachial cutaneous nerve block as well? -Unlike the truncal block project with many blocks similar or within millimeters apart, there is less of that need in UE and LE blocks to be so strictly anatomical with our discussion and I appreciate that we consider historically described and widely used regional techniques. We risk losing the common language across disciplines by making discussions more difficult, confusing, and complicated between surgeons and anesthesiologists/anaesthetists if we go too strongly anatomical. I can imagine confusion if the surgeon is requesting an adductor canal block and I complicate the discussion with stating "you mean the saphenous nerve block above the knee?"

No. I would like to finish my reference in the Comments section of number 36, Nerve to Vastus Medialis block (this should be Bendtsen, RAPM 2016;711).

some blocks need a more accurate anatomical reference, for example PENG

I like the simplicity for single peripheral nerve blocks of naming the nerve blocked and the approach used eg 'saphenous nerve block' and 'perivenous approach proximal to medial malleolus'

Is tricky this naming business, as some of the charm of regional is the history which is very much in the name. A lion is Panthero Leo a Human Homo sapiens, we are creating a taxonomy rather than changing the name. Reckon we will always call the peng a peng and PEC ESP Axillary interscalene won't leave us. So recognise the history and retain names such as PENG and PEC but acknowledge that a taxonomy should exist, this may be more easy to agree on eg interscalene would be USG C5-C6 root nerve block where as an ICB would lead to a Landmark intercostal brachial nerve proximal arm. With regards to the peripheral nerve blocks eg arm, think broad understandings of the concept of what is being achieved by blocking in certain areas eg blocks below the elbow missing the osteotomes and blocks above elbow should catch them, below elbow no use in a trapezectomy.

Please keep consistency and avoid over description

A midfemoral subsartorial saphenous nerve block could have been included

1. main comment is I want to see all the descriptors use the terms: next to, adjacent to, near, etc. (not at the nerve because it sounds like the description is to inject into the nerve - which is never the intent for regional perioperative blocks) 2. the peripheral nerve block at location is a great default description if none of the other terms apply - I suggest we use this in limited fashion as we are trying to standardize nomenclature - however this description is a great default if none of the other block descriptions apply, for clarifying question 1: consensus for every block would be the goal (likely not achievable) clarifying question 2: please see comment 2 above. where did the ankle block go? Would change "of the nerve " in "injection at or around the nerve" , well known and widely used names like wrist block or ankle block can be used, otherwise I would refer to the nerve or plexus as much as possible

Infraclavicular brachial plexus block (Retroclavicular approach) and Infraclavicular brachial plexus block (Costoclavicular approach) cannot be defined without defining needle trajectory. That is what differentiates these blocks from conventional infraclavicular block.

I think there has to be some leeway with the description. There are anatomic variants out there. And some descriptions are much more detailed than others, so it does not appear uniform.

I think it is too late to get rid of "adductor canal block" name as well as IPACK block

Regarding clarifying question 1 - I think this work should strive for consensus for names and anatomical descriptions for every individual nerve block. For many the solution will be easy and is as you have suggested - name of nerve and location.

Although easier, writing "peripheral nerve block" to every individual nerve block would be confusing.

What about fibular nerves (superficial and deep) and dural nerve blocks and the ankle

I noticed that the superomedial and superolateral genicular nerve definition was already defined. However, can you forward my comment to the committee as I think it is a big mistake.

First, there are quite a few vessel there but SMGA is not the most prevalent one. The expectation to see a vessel there is SMGA is completely wrong. See my article enclosed

Second, The SMGA is not always running in short axis to the femur and is not a reliable marker. As described in the literature and our publication, there are three branches of SMGA and only 1 or 3 are running in short axis to the femur.

Third, quite often we see two vessel there and how can you determine which one is SMGA.

what makes this all undertaken difficult is that with the use of ultrasound it is very difficult to propose a nomenclature that account for both a 'landmark' and an US approach

What is probably confusing is how to deal with the combination blocks (e.g. wrist, forearm, mid-humeral, ankle). Perhaps the PNB nomenclature should be accepted then combinations should be separately defined as a combination of multiple PNBs.

Some of the description mentioned imaging techniques which is not in line of the anatomical location of the injection. I feel we should stick to what ever we decide and not go to and fro.

I wasn't in the lower limb group--did we get rid of adductor canal? Also, what about the other 4 nerves of the ankle block? Don't see those there, just the tibial nerve. The rest are commonly blocked with ultrasound, so just want to make sure we're including them.

we might be past the point of no return but we are drifting in an inconsistent direction with naming. Last delphi replaced names like Tequila block with more descriptive of location. Should this not apply to PENG? Also seem to be preferring sciatic nerve at <??> for lower extremity but <??> brachial plexus for upper. This is not consistent and should be if we want to effect change and understanding.

Standardising nomenclature in regional anaesthesia: an international Delphi consensus study

[BACK TO CONTENTS](#)

Delphi study 

ROUND 2

Instructions

For each block, please state whether you **agree**, **disagree** or are **unsure** about the provided **NAME** and **DESCRIPTION** (anatomical location of injection).  
Please provide comments (+/-references) and if you disagree, please provide an alternative **NAME** or **DESCRIPTION** (anatomical location of injection). [NOTE YOU CAN DISAGREE WITH NAME BUT AGREE WITH DESCRIPTION OR VICE VERSA]

STATUS

INCOMPLETE

Complete

Complete

Complete

Complete

| REGION     |    | NAME                                                           | AGREEMENT | COMMENTS ON NAME | DESCRIPTION (anatomical location of injection)                                                                                                         | AGREEMENT | COMMENTS ON DESCRIPTION |
|------------|----|----------------------------------------------------------------|-----------|------------------|--------------------------------------------------------------------------------------------------------------------------------------------------------|-----------|-------------------------|
| UPPER LIMB | 1  | Interscalene brachial plexus block                             |           |                  | Injection at the C5 and C6 nerve roots between anterior and middle scalene muscles                                                                     |           |                         |
|            | 2  | Superior trunk block                                           |           |                  | Injection at the superior trunk before the suprascapular nerve emerges                                                                                 |           |                         |
|            | 3  | Suprascapular brachial plexus block                            |           |                  | Injection at the divisions of the brachial plexus<br>OR                                                                                                |           |                         |
|            |    |                                                                |           |                  | Injection at the divisions of the brachial plexus immediately cephalad to the clavicle                                                                 |           |                         |
|            | 4  | Superficial cervical plexus block                              |           |                  | Injection superficial to the investing fascia at the midpoint of the posterior border of sternocleidomastoid muscle                                    |           |                         |
|            | 5  | Deep cervical plexus block                                     |           |                  | Injection adjacent to one of more of the transverse processes of C2, 3, and 4, (e.g. a paravertebral technique), deep to the prevertebral fascia<br>OR |           |                         |
|            |    |                                                                |           |                  | Injection adjacent to one of more of the nerve roots of C2, 3, and 4, deep to the prevertebral fascia                                                  |           |                         |
|            | 6  | Intermediate cervical plexus block                             |           |                  | Injection deep to the investing fascia at the midpoint of the posterior border of sternocleidomastoid muscle                                           |           |                         |
|            | 7  | Infrascapular brachial plexus block<br>OR                      |           |                  | Injection at the cords of the brachial plexus                                                                                                          |           |                         |
|            |    | Infrascapular brachial plexus block (infrascapular approach)   |           |                  |                                                                                                                                                        |           |                         |
|            | 8  | Axillary brachial plexus block                                 |           |                  | Injection at the branches of the brachial plexus at the level of the axilla<br>OR                                                                      |           |                         |
|            |    |                                                                |           |                  | Injection at the branches of the brachial plexus in the axillary region                                                                                |           |                         |
|            | 9  | Axillary nerve block                                           |           |                  | Injection of the axillary nerve in the upper humerus exiting the quadrangular space<br>OR                                                              |           |                         |
|            |    |                                                                |           |                  | Injection at the axillary nerve <SPECIFY LOCATION>                                                                                                     |           |                         |
|            | 10 | Midhumeral block<br>OR                                         |           |                  | Injection around the median, ulnar and radial nerves individually at the junction of the upper third and middle third of the arm.<br>OR                |           |                         |
|            |    | Peripheral nerve block                                         |           |                  | <NAME OF PERIPHERAL NERVE> block at the <LOCATION>                                                                                                     |           |                         |
|            | 11 | Suprascapular nerve block (anterior approach)<br>OR            |           |                  | Injection of the suprascapular nerve coming off superior trunk and travelling to posterior neck under the posterior belly of Omohyoid muscle<br>OR     |           |                         |
|            |    | Peripheral nerve block                                         |           |                  | <NAME OF PERIPHERAL NERVE> block at the <LOCATION>                                                                                                     |           |                         |
|            | 12 | Suprascapular nerve (posterior approach)<br>OR                 |           |                  | Injection of the suprascapular nerve in the suprascapular notch or suprascapular fossa<br>OR                                                           |           |                         |
|            |    | Peripheral nerve block                                         |           |                  | <NAME OF PERIPHERAL NERVE> block at the <LOCATION>                                                                                                     |           |                         |
|            | 13 | Forearm block<br>OR                                            |           |                  | Injection of the median, ulnar, radial nerves at the level of elbow<br>OR                                                                              |           |                         |
|            |    | Peripheral nerve block                                         |           |                  | <NAME OF PERIPHERAL NERVE> block at the <LOCATION>                                                                                                     |           |                         |
|            | 14 | Infrascapular brachial plexus block (Retroclavicular approach) |           |                  | Injection at the cords of the brachial plexus                                                                                                          |           |                         |

|            |  |    |    |                                                                   |  |  |  |                                                                                                                                                                                                                                                                                                                                                                                                |  |  |
|------------|--|----|----|-------------------------------------------------------------------|--|--|--|------------------------------------------------------------------------------------------------------------------------------------------------------------------------------------------------------------------------------------------------------------------------------------------------------------------------------------------------------------------------------------------------|--|--|
|            |  | 15 | a  | Infraxclavicular brachial plexus block (Costoclavicular approach) |  |  |  | Injection at the brachial plexus in the proximal infra-clavicular fossa, where the lateral, medial, and posterior cords are tightly bundled                                                                                                                                                                                                                                                    |  |  |
|            |  |    | b  |                                                                   |  |  |  | OR                                                                                                                                                                                                                                                                                                                                                                                             |  |  |
|            |  |    |    |                                                                   |  |  |  | Injection at the cords of the brachial plexus                                                                                                                                                                                                                                                                                                                                                  |  |  |
|            |  | 16 | a  | Wrist block                                                       |  |  |  | Injection of the median, ulnar and radial nerves at the level of the wrist by separate injections                                                                                                                                                                                                                                                                                              |  |  |
|            |  |    | OR |                                                                   |  |  |  | OR                                                                                                                                                                                                                                                                                                                                                                                             |  |  |
|            |  |    | b  | Peripheral nerve block                                            |  |  |  | <NAME OF PERIPHERAL NERVE> block at the <LOCATION>                                                                                                                                                                                                                                                                                                                                             |  |  |
|            |  | 17 | a  | Intercostobrachial nerve block                                    |  |  |  | Injection 2-3 cm distal to the axillary crease in an anterior-posterior distribution approximately 3-5 cm wide between the biceps and the triceps muscles                                                                                                                                                                                                                                      |  |  |
|            |  |    | OR |                                                                   |  |  |  | OR                                                                                                                                                                                                                                                                                                                                                                                             |  |  |
|            |  |    | b  | Peripheral nerve block                                            |  |  |  | <NAME OF PERIPHERAL NERVE> block at the <LOCATION>                                                                                                                                                                                                                                                                                                                                             |  |  |
|            |  |    |    |                                                                   |  |  |  |                                                                                                                                                                                                                                                                                                                                                                                                |  |  |
| LOWER LIMB |  | 18 |    | Lumbar plexus block                                               |  |  |  | Injection at the level of the lumbar roots (L2-4) coursing in the posterior third of the psoas muscle                                                                                                                                                                                                                                                                                          |  |  |
|            |  | 19 | a  | Femoral nerve block                                               |  |  |  | Injection of the femoral nerve cephalad to the bifurcation of the femoral artery, distal to the inguinal ligament and deep to both fascia lata and fascia iliaca, over the surface of the iliacus muscle.                                                                                                                                                                                      |  |  |
|            |  |    | b  |                                                                   |  |  |  | Injection of the femoral nerve cephalad to the bifurcation of the femoral artery, deep to the fascia iliaca                                                                                                                                                                                                                                                                                    |  |  |
|            |  | 20 | a  | Fascia iliaca block (supra-inguinal approach)                     |  |  |  | Injection deep to the fascia iliaca over the surface of the iliacus muscle, superiorly and medially to the anterior superior iliac spine, proximal to the inguinal ligament.                                                                                                                                                                                                                   |  |  |
|            |  |    | b  |                                                                   |  |  |  | OR                                                                                                                                                                                                                                                                                                                                                                                             |  |  |
|            |  |    |    |                                                                   |  |  |  | Injection deep to the fascia iliaca over the surface of the iliacus muscle, and proximal to the inguinal ligament.                                                                                                                                                                                                                                                                             |  |  |
|            |  | 21 | a  | Fascia iliaca block (infra-inguinal approach)                     |  |  |  | Injection deep to the fascia iliaca, over the surface of the iliacus muscle, and lateral to the femoral nerve, distal to the inguinal ligament.                                                                                                                                                                                                                                                |  |  |
|            |  |    | b  |                                                                   |  |  |  | OR                                                                                                                                                                                                                                                                                                                                                                                             |  |  |
|            |  |    |    |                                                                   |  |  |  | Injection deep to the fascia iliaca over the surface of the iliacus muscle, and distal to the inguinal ligament.                                                                                                                                                                                                                                                                               |  |  |
|            |  | 22 | a  | Lateral femoral cutaneous nerve block                             |  |  |  | Injection at the lateral femoral cutaneous nerve medial to the tensor fascia lata and lateral to the sartorius muscle in a plane between the fascia lata and fascia iliaca, distal to the anterior superior iliac spine.                                                                                                                                                                       |  |  |
|            |  |    | b  |                                                                   |  |  |  | Injection at the lateral femoral cutaneous nerve medial to the tensor fascia lata and lateral to the sartorius muscle in a plane between the fascia lata and fascia iliaca.                                                                                                                                                                                                                    |  |  |
|            |  | 23 | a  | Posterior femoral cutaneous nerve block                           |  |  |  | Injection at the posterior femoral cutaneous nerve superficial and lateral to the sciatic nerve in the subgluteal region, and immediately deep to the gluteus maximus and fascia lata.                                                                                                                                                                                                         |  |  |
|            |  |    | b  |                                                                   |  |  |  | OR                                                                                                                                                                                                                                                                                                                                                                                             |  |  |
|            |  |    |    |                                                                   |  |  |  | Injection at the posterior femoral cutaneous nerve superficial and lateral to the sciatic nerve in the subgluteal region                                                                                                                                                                                                                                                                       |  |  |
|            |  | 24 | a  | Obturator nerve block                                             |  |  |  | Injection of the obturator nerve proximal to the bifurcation into anterior and posterior divisions in the plane between the pectineus and obturator externus muscles branches of the obturator nerve in the upper medial thigh as they lie anteriorly and posteriorly to the adductor brevis muscle respectively                                                                               |  |  |
|            |  |    | b  |                                                                   |  |  |  | Injection of the obturator nerve proximal to the bifurcation into anterior and posterior divisions in the plane between the pectineus and obturator externus muscles                                                                                                                                                                                                                           |  |  |
|            |  | 25 | a  | Genitofemoral nerve block                                         |  |  |  | Injection of the genitofemoral nerve which is an oval structure lying medial and superficial to the femoral artery in the inguinal canal. The contents of the inguinal canal are identified, with testicular vessels located laterally and spermatic cord medially. The needle is advanced in an in-plane approach to direct the needle towards the spermatic cord to block the genital branch |  |  |
|            |  |    | b  |                                                                   |  |  |  | Injection of the genitofemoral nerve which is an oval structure lying medial and superficial to the femoral artery in the inguinal canal.                                                                                                                                                                                                                                                      |  |  |
|            |  | 26 |    | Femoral triangle block                                            |  |  |  | Injection in the aponeurotic compartment containing the femoral vessels proximal to the apex of the femoral triangle. The apex of the femoral triangle is the point where the medial borders of the sartorius and adductor longus muscles cross.                                                                                                                                               |  |  |
|            |  | 27 | a  | Saphenous nerve block at the knee                                 |  |  |  | Injection of the saphenous nerve deep to the sartorius muscle and posterior to the saphenous branch of the descending genicular artery                                                                                                                                                                                                                                                         |  |  |
|            |  |    | OR |                                                                   |  |  |  |                                                                                                                                                                                                                                                                                                                                                                                                |  |  |
|            |  |    | b  | Saphenous nerve block (at the level of the adductor canal)        |  |  |  | Injection in the musculofascial plane between the psoas tendon anteriorly and the pubic ramus posteriorly.                                                                                                                                                                                                                                                                                     |  |  |
|            |  |    | OR |                                                                   |  |  |  |                                                                                                                                                                                                                                                                                                                                                                                                |  |  |
|            |  |    | c  | Peripheral nerve block                                            |  |  |  | <NAME OF PERIPHERAL NERVE> block at the <LOCATION>                                                                                                                                                                                                                                                                                                                                             |  |  |
|            |  | 28 | a  | Pericapsular nerve group (PENG) block                             |  |  |  | The ilio-pubic eminence (IPE), the iliopsoas muscle and tendon, the femoral artery, and pectineus muscle are imaged. Injection in the musculofascial plane between the psoas tendon anteriorly and the pubic ramus posteriorly.                                                                                                                                                                |  |  |
|            |  |    | b  |                                                                   |  |  |  | Injection in the musculofascial plane between the psoas tendon anteriorly and the pubic ramus posteriorly.                                                                                                                                                                                                                                                                                     |  |  |
|            |  | 29 |    | Sacral plexus block                                               |  |  |  | Injection of the sacral plexus just medial to the posterior border of the ischium. The plexus lies deep to the piriformis muscle lateral to the inferior gluteal vessels.                                                                                                                                                                                                                      |  |  |

|  |    |                                             |                                             |  |                                                                    |                                                                                                                                                                                                                                                                                                                                                                   |  |
|--|----|---------------------------------------------|---------------------------------------------|--|--------------------------------------------------------------------|-------------------------------------------------------------------------------------------------------------------------------------------------------------------------------------------------------------------------------------------------------------------------------------------------------------------------------------------------------------------|--|
|  | 30 | Sciatic nerve block (Transgluteal approach) |                                             |  | Injection of the sciatic nerve deep to the gluteus maximus muscle. |                                                                                                                                                                                                                                                                                                                                                                   |  |
|  | 31 | a                                           | Sciatic nerve block (Infragluteal approach) |  |                                                                    | Injection of the sciatic nerve at the midhigh region distal to the inferior border of the gluteus maximus muscle.                                                                                                                                                                                                                                                 |  |
|  | 32 |                                             | Sciatic nerve block (Anterior approach)     |  |                                                                    | Injection of the sciatic nerve between the adductor magnus anteriorly and gluteus maximus or biceps femoris muscles.                                                                                                                                                                                                                                              |  |
|  | 33 | a                                           | Popliteal sciatic nerve block               |  |                                                                    |                                                                                                                                                                                                                                                                                                                                                                   |  |
|  |    |                                             | OR                                          |  |                                                                    | Injection of the sciatic nerve at or near the point of bifurcation in the popliteal fossa                                                                                                                                                                                                                                                                         |  |
|  |    | b                                           | Sciatic nerve block at the popliteal fossa  |  |                                                                    |                                                                                                                                                                                                                                                                                                                                                                   |  |
|  | 34 | a                                           | Selective tibial nerve block                |  |                                                                    |                                                                                                                                                                                                                                                                                                                                                                   |  |
|  |    |                                             | OR                                          |  |                                                                    | Injection of the tibial nerve distal to the sciatic nerve bifurcation                                                                                                                                                                                                                                                                                             |  |
|  |    | b                                           | Tibial nerve block at the popliteal fossa   |  |                                                                    |                                                                                                                                                                                                                                                                                                                                                                   |  |
|  | 35 | a                                           | Posterior tibial nerve block                |  |                                                                    | Injection of the posterior tibial nerve proximal to medial malleolus, the tendons of the tibiais anterior and flexor digitorum profundus are anterior to the nerve and gastrocnemius-soleus posterior to it. The posterior tibial artery and the tendon of flexor hallucis longus lie deep to the nerve, often with two small veins on either side of the artery. |  |
|  |    |                                             | OR                                          |  |                                                                    | Injection at the tibial nerve proximal to medial malleolus, the tendons of the tibiais anterior and flexor digitorum profundus are anterior to the nerve and gastrocnemius-soleus posterior to it. The posterior tibial artery and the tendon of flexor hallucis longus lie deep to the nerve, often with two small veins on either side of the artery.           |  |
|  |    | b                                           | Tibial nerve block at the ankle             |  |                                                                    |                                                                                                                                                                                                                                                                                                                                                                   |  |
|  | 36 |                                             | Nerve to vastus medialis block              |  |                                                                    | Injection of the nerve to vastus medialis where it is located deep to the sartorius and lateral to the saphenous nerve and femoral vessels in the femoral triangle                                                                                                                                                                                                |  |

COMMENTS

Are there any further comments or suggestions you would like to make?

CLARIFYING QUESTION 1

PERIPHERAL NERVE BLOCKS

Should names be presented as <NAME OF NERVE> block at the <LOCATION>

CLARIFYING QUESTION 2

PERIPHERAL NERVE BLOCKS

If we establish principles for naming blocks especially for long nerves, should we have consensus on names and anatomical descriptions of all peripheral nerve blocks?



Standardising nomenclature in regional anaesthesia: an international Delphi consensus study

[BACK TO CONTENTS](#)  
Delphi study Round 2 Rationale

| REGION     |    | Rationale                                                                                                                                                                    | NAME                                                             | DESCRIPTION (anatomical location of injection)                                                                                                   | Rationale                                                                                                                                                                                                       |
|------------|----|------------------------------------------------------------------------------------------------------------------------------------------------------------------------------|------------------------------------------------------------------|--------------------------------------------------------------------------------------------------------------------------------------------------|-----------------------------------------------------------------------------------------------------------------------------------------------------------------------------------------------------------------|
| UPPER LIMB | 1  | <b>Weak consensus (71%), but in keeping with Clarifying question 1.</b>                                                                                                      | Interscalene brachial plexus block                               | Injection at the C5 and C6 nerve roots between anterior and middle scalene muscles                                                               | Simplify the description whilst maintaining key anatomical landmarks. No strong consensus for previous descriptions.                                                                                            |
|            | 2  | <b>Highest agreement with superior trunk block (73%), but weak consensus.</b>                                                                                                | Superior trunk block                                             | Revision:<br>Injection at the superior trunk before the suprascapular nerve emerges                                                              | Simplify the description while maintaining anatomical landmarks. Weak consensus (73%) for previous descriptions.                                                                                                |
|            | 3  | <b>Strong consensus (76%). No changes</b>                                                                                                                                    | Supraclavicular brachial plexus block                            | Injection at the divisions of the brachial plexus                                                                                                | Simplify the description whilst maintaining key anatomical landmarks. No strong consensus for previous descriptions.                                                                                            |
|            |    |                                                                                                                                                                              |                                                                  | Injection at the divisions of the brachial plexus immediately cephalad to the clavicle                                                           | Simplify the description whilst maintaining anatomical landmarks. No strong consensus for previous descriptions.                                                                                                |
|            | 4  | <b>Strong consensus (90%). No changes.</b>                                                                                                                                   | Superficial cervical plexus block                                | Injection superficial to the investing fascia at the midpoint of the posterior border of sternocleidomastoid muscle                              | Strong consensus (85%). No changes.                                                                                                                                                                             |
|            | 5  | <b>Strong consensus (85%). No changes.</b>                                                                                                                                   | Deep cervical plexus block                                       | Injection adjacent to one of more of the transverse processes of C2, 3, and 4. (e.g. a paravertebral technique), deep to the prevertebral fascia | Proposal to simplify the description whilst maintaining key anatomical landmarks, despite previously strong consensus (89%).                                                                                    |
|            |    |                                                                                                                                                                              |                                                                  | Revision:<br>Injection adjacent to one of more of the nerve roots of C2, 3, and 4, deep to the prevertebral fascia                               |                                                                                                                                                                                                                 |
|            | 6  | <b>Weak consensus (51%) but no changes.</b>                                                                                                                                  | Intermediate cervical plexus block                               | Injection deep to the investing fascia at the midpoint of the posterior border of sternocleidomastoid muscle                                     | Simplify the description whilst maintaining key anatomical landmarks. No strong consensus for previous descriptions.                                                                                            |
|            | 7  | <b>Strong consensus (78%), but given needle tip location is similar to other techniques (costoclavicular and retroclavicular), proposal to harmonize nomenclature.</b>       | Infraclavicular brachial plexus block                            | Injection at the cords of the brachial plexus                                                                                                    | Simplify the description whilst maintaining key anatomical landmarks. No strong consensus for previous descriptions.                                                                                            |
|            |    |                                                                                                                                                                              | Infraclavicular brachial plexus block (infraclavicular approach) |                                                                                                                                                  |                                                                                                                                                                                                                 |
|            | 8  | <b>Strong consensus (80%), along with clarifying question 1 support.</b>                                                                                                     | Axillary brachial plexus block                                   | Injection at the branches of the brachial plexus at the level of the axilla                                                                      | Simplify the descriptions whilst maintaining key anatomical landmarks. No strong consensus for previous descriptions.                                                                                           |
|            |    |                                                                                                                                                                              |                                                                  | Injection at the branches of the brachial plexus in the axillary region                                                                          | Simplify the descriptions whilst maintaining key anatomical landmarks. No strong consensus for previous descriptions.                                                                                           |
|            | 9  | <b>Strong consensus (86%). No changes.</b>                                                                                                                                   | Axillary nerve block                                             | Injection of the axillary nerve in the upper humerus exiting the quadrangular space                                                              | Proposal to avoid specifying anatomical descriptions of each individual peripheral nerve block, but provide a template for describing. No strong consensus for previous descriptions.                           |
|            |    |                                                                                                                                                                              |                                                                  | Injection at the axillary nerve <SPECIFY LOCATION>                                                                                               |                                                                                                                                                                                                                 |
|            | 10 | <b>Proposal to avoid specifying names of each individual peripheral nerve block, but provide a template for naming. No strong consensus for Midhumeral block (63%) name.</b> | Midhumeral block                                                 | Injection around the median, ulnar and radial nerves individually at the junction of the upper third and middle third of the arm.                | Proposal to avoid specifying anatomical descriptions of each individual peripheral nerve block, but provide a template for describing. Strong consensus (78%) for previous descriptions.                        |
|            |    |                                                                                                                                                                              | Peripheral nerve block                                           | <NAME OF PERIPHERAL NERVE> block at the <LOCATION>                                                                                               |                                                                                                                                                                                                                 |
|            | 11 | <b>Strong consensus (82%). Brackets added around 'anterior approach'.</b>                                                                                                    | Suprascapular nerve block (anterior approach)                    | Injection of the suprascapular nerve coming off superior trunk and travelling to posterior neck under the posterior belly of Omohyoid muscle     | Proposal to avoid specifying anatomical descriptions of each individual peripheral nerve block, but provide a template for describing. Strong consensus (87%) for previous descriptions.                        |
|            |    |                                                                                                                                                                              | Peripheral nerve block                                           | <NAME OF PERIPHERAL NERVE> block at the <LOCATION>                                                                                               |                                                                                                                                                                                                                 |
|            | 12 | <b>Strong consensus (78%). Brackets added around 'posterior approach'.</b>                                                                                                   | Suprascapular nerve (posterior approach)                         | Injection of the suprascapular nerve in the suprascapular notch or suprascapular fossa                                                           | Proposal to avoid specifying anatomical descriptions of each individual peripheral nerve block, but provide a template for describing. Strong consensus (86%) for previous descriptions.                        |
|            |    |                                                                                                                                                                              | Peripheral nerve block                                           | <NAME OF PERIPHERAL NERVE> block at the <LOCATION>                                                                                               |                                                                                                                                                                                                                 |
|            | 13 | <b>Proposal to avoid specifying names of each individual peripheral nerve block, but provide a template for naming. No consensus for Forearm block (46%) name.</b>           | Forearm block                                                    | Injection of the median, ulnar, radial nerves at the level of elbow                                                                              | Proposal to avoid specifying anatomical descriptions of each individual peripheral nerve block, but provide a template for describing. Weak consensus (63%) for previous descriptions.                          |
|            |    |                                                                                                                                                                              | Peripheral nerve block                                           | <NAME OF PERIPHERAL NERVE> block at the <LOCATION>                                                                                               |                                                                                                                                                                                                                 |
|            | 14 | <b>No consensus on names (&lt;50%). Given needle tip location is similar to other techniques (infraclavicular and retroclavicular), proposal to harmonize nomenclature.</b>  | Infraclavicular brachial plexus block (Retroclavicular approach) | Injection at the cords of the brachial plexus                                                                                                    | Simplify the description whilst maintaining key anatomical landmarks. No strong consensus for previous descriptions.                                                                                            |
|            | 15 | <b>No consensus on names (&lt;50%). Given needle tip location is similar to other techniques (infraclavicular and costoclavicular), proposal to harmonize nomenclature.</b>  | Infraclavicular brachial plexus block (Costoclavicular approach) | Injection at the brachial plexus in the proximal infra-clavicular fossa, where the lateral, medial, and posterior cords are tightly bundled      | Proposal to simplify the description in keeping with other approaches with the same needle-tip endpoint, whilst maintaining key anatomical landmarks. Strong consensus for previous descriptions (76% and 82%). |
|            |    |                                                                                                                                                                              |                                                                  | Injection at the cords of the brachial plexus                                                                                                    |                                                                                                                                                                                                                 |

|            |    |   |                                                                                                                                                                                  |                                               |                                                                                                                                                                                                                                                                                                                                                                                                                                                                                                                                                                                                                                                                                                                                                                                                                                                                                                                                                                                                                                                                                                                                                                                                                                                                                                                                                                                                                                                                                                                                                                                                                                                                                                                                                                                                                                                                                                                                                                                                                                                                                                                                                                                                                                                                                                                                                                                                                                                                                                                                                                                                                                                                                                                                                                                                                                                                                                                                                                                                                                                                                                                                                                                                                                                                                                                                                                                                                                                                                                                                                                                                                                                                                                                                                                                                                                                                                                                                                                                                                                                                                                                                                                                                                                                                                                                                                                                                                                                                                                                                                                                                                                                                                                                                                                                                                                                                                                                                                                                                                                                                                                                                                                                                                                                                                                                                                                                                                                                                                                                                                                                                                                                                                                                                                                                                                                                                                                                                                                                                                                                                                                                                                                                                                                                                                                                                                                                                                                                                                                                                                                                                                                                                                                                                                                                                                                                                                                                                                                                                                                                                                                                                                                                                                                                                                                                                                                                                                                                                                                                                                                                                                                                                                                                                                                                                                                                                                                                                                                                                                                                                                                                                                                                                                                                                                                                                                                                                                                                                                                                                                                                                                                                                                                                                                                                                                                                                                                                                                                                                                                                                                                                                                                                                                                                                                                                                                                                                                                                                                                                                                                                                                                                                                                                                                                                                                                                                                          |                                                                                                                                                                                          |
|------------|----|---|----------------------------------------------------------------------------------------------------------------------------------------------------------------------------------|-----------------------------------------------|------------------------------------------------------------------------------------------------------------------------------------------------------------------------------------------------------------------------------------------------------------------------------------------------------------------------------------------------------------------------------------------------------------------------------------------------------------------------------------------------------------------------------------------------------------------------------------------------------------------------------------------------------------------------------------------------------------------------------------------------------------------------------------------------------------------------------------------------------------------------------------------------------------------------------------------------------------------------------------------------------------------------------------------------------------------------------------------------------------------------------------------------------------------------------------------------------------------------------------------------------------------------------------------------------------------------------------------------------------------------------------------------------------------------------------------------------------------------------------------------------------------------------------------------------------------------------------------------------------------------------------------------------------------------------------------------------------------------------------------------------------------------------------------------------------------------------------------------------------------------------------------------------------------------------------------------------------------------------------------------------------------------------------------------------------------------------------------------------------------------------------------------------------------------------------------------------------------------------------------------------------------------------------------------------------------------------------------------------------------------------------------------------------------------------------------------------------------------------------------------------------------------------------------------------------------------------------------------------------------------------------------------------------------------------------------------------------------------------------------------------------------------------------------------------------------------------------------------------------------------------------------------------------------------------------------------------------------------------------------------------------------------------------------------------------------------------------------------------------------------------------------------------------------------------------------------------------------------------------------------------------------------------------------------------------------------------------------------------------------------------------------------------------------------------------------------------------------------------------------------------------------------------------------------------------------------------------------------------------------------------------------------------------------------------------------------------------------------------------------------------------------------------------------------------------------------------------------------------------------------------------------------------------------------------------------------------------------------------------------------------------------------------------------------------------------------------------------------------------------------------------------------------------------------------------------------------------------------------------------------------------------------------------------------------------------------------------------------------------------------------------------------------------------------------------------------------------------------------------------------------------------------------------------------------------------------------------------------------------------------------------------------------------------------------------------------------------------------------------------------------------------------------------------------------------------------------------------------------------------------------------------------------------------------------------------------------------------------------------------------------------------------------------------------------------------------------------------------------------------------------------------------------------------------------------------------------------------------------------------------------------------------------------------------------------------------------------------------------------------------------------------------------------------------------------------------------------------------------------------------------------------------------------------------------------------------------------------------------------------------------------------------------------------------------------------------------------------------------------------------------------------------------------------------------------------------------------------------------------------------------------------------------------------------------------------------------------------------------------------------------------------------------------------------------------------------------------------------------------------------------------------------------------------------------------------------------------------------------------------------------------------------------------------------------------------------------------------------------------------------------------------------------------------------------------------------------------------------------------------------------------------------------------------------------------------------------------------------------------------------------------------------------------------------------------------------------------------------------------------------------------------------------------------------------------------------------------------------------------------------------------------------------------------------------------------------------------------------------------------------------------------------------------------------------------------------------------------------------------------------------------------------------------------------------------------------------------------------------------------------------------------------------------------------------------------------------------------------------------------------------------------------------------------------------------------------------------------------------------------------------------------------------------------------------------------------------------------------------------------------------------------------------------------------------------------------------------------------------------------------------------------------------------------------------------------------------------------------------------------------------------------------------------------------------------------------------------------------------------------------------------------------------------------------------------------------------------------------------------------------------------------------------------------------------------------------------------------------------------------------------------------------------------------------------------------------------------------------------------------------------------------------------------------------------------------------------------------------------------------------------------------------------------------------------------------------------------------------------------------------------------------------------------------------------------------------------------------------------------------------------------------------------------------------------------------------------------------------------------------------------------------------------------------------------------------------------------------------------------------------------------------------------------------------------------------------------------------------------------------------------------------------------------------------------------------------------------------------------------------------------------------------------------------------------------------------------------------------------------------------------------------------------------------------------------------------------------------------------------------------------------------------------------------------------------------------------------------------------------------------------------------------------------------------------------------------------------------------------------------------------------------------------------------------------------------------------------------------------------------------------------------|------------------------------------------------------------------------------------------------------------------------------------------------------------------------------------------|
| LOWER LIMB | 16 | a | Proposal to avoid specifying names of each individual peripheral nerve block, but provide a template for naming. No strong consensus for Wrist block (68%) name.                 | Wrist block                                   | Injection of the median, ulnar and radial nerves at the level of the wrist by separate injections                                                                                                                                                                                                                                                                                                                                                                                                                                                                                                                                                                                                                                                                                                                                                                                                                                                                                                                                                                                                                                                                                                                                                                                                                                                                                                                                                                                                                                                                                                                                                                                                                                                                                                                                                                                                                                                                                                                                                                                                                                                                                                                                                                                                                                                                                                                                                                                                                                                                                                                                                                                                                                                                                                                                                                                                                                                                                                                                                                                                                                                                                                                                                                                                                                                                                                                                                                                                                                                                                                                                                                                                                                                                                                                                                                                                                                                                                                                                                                                                                                                                                                                                                                                                                                                                                                                                                                                                                                                                                                                                                                                                                                                                                                                                                                                                                                                                                                                                                                                                                                                                                                                                                                                                                                                                                                                                                                                                                                                                                                                                                                                                                                                                                                                                                                                                                                                                                                                                                                                                                                                                                                                                                                                                                                                                                                                                                                                                                                                                                                                                                                                                                                                                                                                                                                                                                                                                                                                                                                                                                                                                                                                                                                                                                                                                                                                                                                                                                                                                                                                                                                                                                                                                                                                                                                                                                                                                                                                                                                                                                                                                                                                                                                                                                                                                                                                                                                                                                                                                                                                                                                                                                                                                                                                                                                                                                                                                                                                                                                                                                                                                                                                                                                                                                                                                                                                                                                                                                                                                                                                                                                                                                                                                                                                                                                                        | Proposal to avoid specifying anatomical descriptions of each individual peripheral nerve block, but provide a template for describing. Strong consensus (78%) for previous descriptions. |
|            |    | b |                                                                                                                                                                                  | Peripheral nerve block                        | <NAME OF PERIPHERAL NERVE> block at the <LOCATION>                                                                                                                                                                                                                                                                                                                                                                                                                                                                                                                                                                                                                                                                                                                                                                                                                                                                                                                                                                                                                                                                                                                                                                                                                                                                                                                                                                                                                                                                                                                                                                                                                                                                                                                                                                                                                                                                                                                                                                                                                                                                                                                                                                                                                                                                                                                                                                                                                                                                                                                                                                                                                                                                                                                                                                                                                                                                                                                                                                                                                                                                                                                                                                                                                                                                                                                                                                                                                                                                                                                                                                                                                                                                                                                                                                                                                                                                                                                                                                                                                                                                                                                                                                                                                                                                                                                                                                                                                                                                                                                                                                                                                                                                                                                                                                                                                                                                                                                                                                                                                                                                                                                                                                                                                                                                                                                                                                                                                                                                                                                                                                                                                                                                                                                                                                                                                                                                                                                                                                                                                                                                                                                                                                                                                                                                                                                                                                                                                                                                                                                                                                                                                                                                                                                                                                                                                                                                                                                                                                                                                                                                                                                                                                                                                                                                                                                                                                                                                                                                                                                                                                                                                                                                                                                                                                                                                                                                                                                                                                                                                                                                                                                                                                                                                                                                                                                                                                                                                                                                                                                                                                                                                                                                                                                                                                                                                                                                                                                                                                                                                                                                                                                                                                                                                                                                                                                                                                                                                                                                                                                                                                                                                                                                                                                                                                                                                                       |                                                                                                                                                                                          |
|            | 17 | a | Proposal to avoid specifying names of each individual peripheral nerve block, but provide a template for naming. Strong consensus for Intercostobrachial nerve block (79%) name. | Intercostobrachial nerve block                | Injection 2-3 cm distal to the axillary crease in an anterior-posterior distribution approximately 3-5 cm wide between the biceps and the triceps muscles                                                                                                                                                                                                                                                                                                                                                                                                                                                                                                                                                                                                                                                                                                                                                                                                                                                                                                                                                                                                                                                                                                                                                                                                                                                                                                                                                                                                                                                                                                                                                                                                                                                                                                                                                                                                                                                                                                                                                                                                                                                                                                                                                                                                                                                                                                                                                                                                                                                                                                                                                                                                                                                                                                                                                                                                                                                                                                                                                                                                                                                                                                                                                                                                                                                                                                                                                                                                                                                                                                                                                                                                                                                                                                                                                                                                                                                                                                                                                                                                                                                                                                                                                                                                                                                                                                                                                                                                                                                                                                                                                                                                                                                                                                                                                                                                                                                                                                                                                                                                                                                                                                                                                                                                                                                                                                                                                                                                                                                                                                                                                                                                                                                                                                                                                                                                                                                                                                                                                                                                                                                                                                                                                                                                                                                                                                                                                                                                                                                                                                                                                                                                                                                                                                                                                                                                                                                                                                                                                                                                                                                                                                                                                                                                                                                                                                                                                                                                                                                                                                                                                                                                                                                                                                                                                                                                                                                                                                                                                                                                                                                                                                                                                                                                                                                                                                                                                                                                                                                                                                                                                                                                                                                                                                                                                                                                                                                                                                                                                                                                                                                                                                                                                                                                                                                                                                                                                                                                                                                                                                                                                                                                                                                                                                                                | Proposal to avoid specifying anatomical descriptions of each individual peripheral nerve block, but provide a template for describing. No consensus (50%) for previous descriptions.     |
|            |    | b |                                                                                                                                                                                  | Peripheral nerve block                        | <NAME OF PERIPHERAL NERVE> block at the <LOCATION>                                                                                                                                                                                                                                                                                                                                                                                                                                                                                                                                                                                                                                                                                                                                                                                                                                                                                                                                                                                                                                                                                                                                                                                                                                                                                                                                                                                                                                                                                                                                                                                                                                                                                                                                                                                                                                                                                                                                                                                                                                                                                                                                                                                                                                                                                                                                                                                                                                                                                                                                                                                                                                                                                                                                                                                                                                                                                                                                                                                                                                                                                                                                                                                                                                                                                                                                                                                                                                                                                                                                                                                                                                                                                                                                                                                                                                                                                                                                                                                                                                                                                                                                                                                                                                                                                                                                                                                                                                                                                                                                                                                                                                                                                                                                                                                                                                                                                                                                                                                                                                                                                                                                                                                                                                                                                                                                                                                                                                                                                                                                                                                                                                                                                                                                                                                                                                                                                                                                                                                                                                                                                                                                                                                                                                                                                                                                                                                                                                                                                                                                                                                                                                                                                                                                                                                                                                                                                                                                                                                                                                                                                                                                                                                                                                                                                                                                                                                                                                                                                                                                                                                                                                                                                                                                                                                                                                                                                                                                                                                                                                                                                                                                                                                                                                                                                                                                                                                                                                                                                                                                                                                                                                                                                                                                                                                                                                                                                                                                                                                                                                                                                                                                                                                                                                                                                                                                                                                                                                                                                                                                                                                                                                                                                                                                                                                                                                       |                                                                                                                                                                                          |
|            | 18 | a | Strong consensus (88%). No changes                                                                                                                                               | Lumbar plexus block                           | Injection at the level of the lumbar roots (L2-4) coursing in the posterior third of the psoas muscle. 'Trident' technique Entry of the block needle into the posterior part of the psoas muscle was initially confirmed by observing subtle contraction of the psoas muscle, as a result of direct muscle stimulation. Revision: Injection at the level of the lumbar roots (L2-4) coursing in the posterior third of the psoas muscle                                                                                                                                                                                                                                                                                                                                                                                                                                                                                                                                                                                                                                                                                                                                                                                                                                                                                                                                                                                                                                                                                                                                                                                                                                                                                                                                                                                                                                                                                                                                                                                                                                                                                                                                                                                                                                                                                                                                                                                                                                                                                                                                                                                                                                                                                                                                                                                                                                                                                                                                                                                                                                                                                                                                                                                                                                                                                                                                                                                                                                                                                                                                                                                                                                                                                                                                                                                                                                                                                                                                                                                                                                                                                                                                                                                                                                                                                                                                                                                                                                                                                                                                                                                                                                                                                                                                                                                                                                                                                                                                                                                                                                                                                                                                                                                                                                                                                                                                                                                                                                                                                                                                                                                                                                                                                                                                                                                                                                                                                                                                                                                                                                                                                                                                                                                                                                                                                                                                                                                                                                                                                                                                                                                                                                                                                                                                                                                                                                                                                                                                                                                                                                                                                                                                                                                                                                                                                                                                                                                                                                                                                                                                                                                                                                                                                                                                                                                                                                                                                                                                                                                                                                                                                                                                                                                                                                                                                                                                                                                                                                                                                                                                                                                                                                                                                                                                                                                                                                                                                                                                                                                                                                                                                                                                                                                                                                                                                                                                                                                                                                                                                                                                                                                                                                                                                                                                                                                                                                                  | Simplify the description while maintaining key anatomical landmarks. Strong consensus (80%) for previous description.                                                                    |
|            |    | b |                                                                                                                                                                                  |                                               |                                                                                                                                                                                                                                                                                                                                                                                                                                                                                                                                                                                                                                                                                                                                                                                                                                                                                                                                                                                                                                                                                                                                                                                                                                                                                                                                                                                                                                                                                                                                                                                                                                                                                                                                                                                                                                                                                                                                                                                                                                                                                                                                                                                                                                                                                                                                                                                                                                                                                                                                                                                                                                                                                                                                                                                                                                                                                                                                                                                                                                                                                                                                                                                                                                                                                                                                                                                                                                                                                                                                                                                                                                                                                                                                                                                                                                                                                                                                                                                                                                                                                                                                                                                                                                                                                                                                                                                                                                                                                                                                                                                                                                                                                                                                                                                                                                                                                                                                                                                                                                                                                                                                                                                                                                                                                                                                                                                                                                                                                                                                                                                                                                                                                                                                                                                                                                                                                                                                                                                                                                                                                                                                                                                                                                                                                                                                                                                                                                                                                                                                                                                                                                                                                                                                                                                                                                                                                                                                                                                                                                                                                                                                                                                                                                                                                                                                                                                                                                                                                                                                                                                                                                                                                                                                                                                                                                                                                                                                                                                                                                                                                                                                                                                                                                                                                                                                                                                                                                                                                                                                                                                                                                                                                                                                                                                                                                                                                                                                                                                                                                                                                                                                                                                                                                                                                                                                                                                                                                                                                                                                                                                                                                                                                                                                                                                                                                                                                          |                                                                                                                                                                                          |
|            | 19 | a | Strong consensus (98%). No changes.                                                                                                                                              | Femoral nerve block                           | Injection of the femoral nerve cephalad to the bifurcation of the femoral artery, distal to the inguinal ligament and deep to both fascia lata and fascia iliaca, over the surface of the iliacus muscle. Revision: Injection of the femoral nerve cephalad to the bifurcation of the femoral artery, deep to the fascia iliaca                                                                                                                                                                                                                                                                                                                                                                                                                                                                                                                                                                                                                                                                                                                                                                                                                                                                                                                                                                                                                                                                                                                                                                                                                                                                                                                                                                                                                                                                                                                                                                                                                                                                                                                                                                                                                                                                                                                                                                                                                                                                                                                                                                                                                                                                                                                                                                                                                                                                                                                                                                                                                                                                                                                                                                                                                                                                                                                                                                                                                                                                                                                                                                                                                                                                                                                                                                                                                                                                                                                                                                                                                                                                                                                                                                                                                                                                                                                                                                                                                                                                                                                                                                                                                                                                                                                                                                                                                                                                                                                                                                                                                                                                                                                                                                                                                                                                                                                                                                                                                                                                                                                                                                                                                                                                                                                                                                                                                                                                                                                                                                                                                                                                                                                                                                                                                                                                                                                                                                                                                                                                                                                                                                                                                                                                                                                                                                                                                                                                                                                                                                                                                                                                                                                                                                                                                                                                                                                                                                                                                                                                                                                                                                                                                                                                                                                                                                                                                                                                                                                                                                                                                                                                                                                                                                                                                                                                                                                                                                                                                                                                                                                                                                                                                                                                                                                                                                                                                                                                                                                                                                                                                                                                                                                                                                                                                                                                                                                                                                                                                                                                                                                                                                                                                                                                                                                                                                                                                                                                                                                                                          | Simplify the description while maintaining key anatomical landmarks. Strong consensus (92%) for previous description.                                                                    |
|            |    | b |                                                                                                                                                                                  |                                               |                                                                                                                                                                                                                                                                                                                                                                                                                                                                                                                                                                                                                                                                                                                                                                                                                                                                                                                                                                                                                                                                                                                                                                                                                                                                                                                                                                                                                                                                                                                                                                                                                                                                                                                                                                                                                                                                                                                                                                                                                                                                                                                                                                                                                                                                                                                                                                                                                                                                                                                                                                                                                                                                                                                                                                                                                                                                                                                                                                                                                                                                                                                                                                                                                                                                                                                                                                                                                                                                                                                                                                                                                                                                                                                                                                                                                                                                                                                                                                                                                                                                                                                                                                                                                                                                                                                                                                                                                                                                                                                                                                                                                                                                                                                                                                                                                                                                                                                                                                                                                                                                                                                                                                                                                                                                                                                                                                                                                                                                                                                                                                                                                                                                                                                                                                                                                                                                                                                                                                                                                                                                                                                                                                                                                                                                                                                                                                                                                                                                                                                                                                                                                                                                                                                                                                                                                                                                                                                                                                                                                                                                                                                                                                                                                                                                                                                                                                                                                                                                                                                                                                                                                                                                                                                                                                                                                                                                                                                                                                                                                                                                                                                                                                                                                                                                                                                                                                                                                                                                                                                                                                                                                                                                                                                                                                                                                                                                                                                                                                                                                                                                                                                                                                                                                                                                                                                                                                                                                                                                                                                                                                                                                                                                                                                                                                                                                                                                                          |                                                                                                                                                                                          |
|            | 20 | a | Strong consensus (92%). Placed 'supra-inguinal approach' in brackets.                                                                                                            | Fascia iliaca block (supra-inguinal approach) | Injection deep to the fascia iliaca over the surface of the iliacus muscle, superiorly and medially to the anterior superior iliac spine, proximal to the inguinal ligament. Revision: Injection deep to the fascia iliaca over the surface of the iliacus muscle, and proximal to the inguinal ligament.                                                                                                                                                                                                                                                                                                                                                                                                                                                                                                                                                                                                                                                                                                                                                                                                                                                                                                                                                                                                                                                                                                                                                                                                                                                                                                                                                                                                                                                                                                                                                                                                                                                                                                                                                                                                                                                                                                                                                                                                                                                                                                                                                                                                                                                                                                                                                                                                                                                                                                                                                                                                                                                                                                                                                                                                                                                                                                                                                                                                                                                                                                                                                                                                                                                                                                                                                                                                                                                                                                                                                                                                                                                                                                                                                                                                                                                                                                                                                                                                                                                                                                                                                                                                                                                                                                                                                                                                                                                                                                                                                                                                                                                                                                                                                                                                                                                                                                                                                                                                                                                                                                                                                                                                                                                                                                                                                                                                                                                                                                                                                                                                                                                                                                                                                                                                                                                                                                                                                                                                                                                                                                                                                                                                                                                                                                                                                                                                                                                                                                                                                                                                                                                                                                                                                                                                                                                                                                                                                                                                                                                                                                                                                                                                                                                                                                                                                                                                                                                                                                                                                                                                                                                                                                                                                                                                                                                                                                                                                                                                                                                                                                                                                                                                                                                                                                                                                                                                                                                                                                                                                                                                                                                                                                                                                                                                                                                                                                                                                                                                                                                                                                                                                                                                                                                                                                                                                                                                                                                                                                                                                                                | Simplify the description and remove the reference to the anterior superior iliac spine. Strong consensus (91%) for previous description.                                                 |
|            |    | b |                                                                                                                                                                                  |                                               |                                                                                                                                                                                                                                                                                                                                                                                                                                                                                                                                                                                                                                                                                                                                                                                                                                                                                                                                                                                                                                                                                                                                                                                                                                                                                                                                                                                                                                                                                                                                                                                                                                                                                                                                                                                                                                                                                                                                                                                                                                                                                                                                                                                                                                                                                                                                                                                                                                                                                                                                                                                                                                                                                                                                                                                                                                                                                                                                                                                                                                                                                                                                                                                                                                                                                                                                                                                                                                                                                                                                                                                                                                                                                                                                                                                                                                                                                                                                                                                                                                                                                                                                                                                                                                                                                                                                                                                                                                                                                                                                                                                                                                                                                                                                                                                                                                                                                                                                                                                                                                                                                                                                                                                                                                                                                                                                                                                                                                                                                                                                                                                                                                                                                                                                                                                                                                                                                                                                                                                                                                                                                                                                                                                                                                                                                                                                                                                                                                                                                                                                                                                                                                                                                                                                                                                                                                                                                                                                                                                                                                                                                                                                                                                                                                                                                                                                                                                                                                                                                                                                                                                                                                                                                                                                                                                                                                                                                                                                                                                                                                                                                                                                                                                                                                                                                                                                                                                                                                                                                                                                                                                                                                                                                                                                                                                                                                                                                                                                                                                                                                                                                                                                                                                                                                                                                                                                                                                                                                                                                                                                                                                                                                                                                                                                                                                                                                                                                          |                                                                                                                                                                                          |
|            | 21 | a | Strong consensus (88%). Placed 'infra-inguinal approach' in brackets.                                                                                                            | Fascia iliaca block (infra-inguinal approach) | Injection deep to the fascia iliaca, over the surface of the iliacus muscle, and lateral to the femoral nerve, distal to the inguinal ligament. Revision: Injection deep to the fascia iliaca over the surface of the iliacus muscle, and distal to the inguinal ligament.                                                                                                                                                                                                                                                                                                                                                                                                                                                                                                                                                                                                                                                                                                                                                                                                                                                                                                                                                                                                                                                                                                                                                                                                                                                                                                                                                                                                                                                                                                                                                                                                                                                                                                                                                                                                                                                                                                                                                                                                                                                                                                                                                                                                                                                                                                                                                                                                                                                                                                                                                                                                                                                                                                                                                                                                                                                                                                                                                                                                                                                                                                                                                                                                                                                                                                                                                                                                                                                                                                                                                                                                                                                                                                                                                                                                                                                                                                                                                                                                                                                                                                                                                                                                                                                                                                                                                                                                                                                                                                                                                                                                                                                                                                                                                                                                                                                                                                                                                                                                                                                                                                                                                                                                                                                                                                                                                                                                                                                                                                                                                                                                                                                                                                                                                                                                                                                                                                                                                                                                                                                                                                                                                                                                                                                                                                                                                                                                                                                                                                                                                                                                                                                                                                                                                                                                                                                                                                                                                                                                                                                                                                                                                                                                                                                                                                                                                                                                                                                                                                                                                                                                                                                                                                                                                                                                                                                                                                                                                                                                                                                                                                                                                                                                                                                                                                                                                                                                                                                                                                                                                                                                                                                                                                                                                                                                                                                                                                                                                                                                                                                                                                                                                                                                                                                                                                                                                                                                                                                                                                                                                                                                               | Simplify the description and make it consistent across different approaches. Strong consensus (93%) for previous description.                                                            |
|            |    | b |                                                                                                                                                                                  |                                               |                                                                                                                                                                                                                                                                                                                                                                                                                                                                                                                                                                                                                                                                                                                                                                                                                                                                                                                                                                                                                                                                                                                                                                                                                                                                                                                                                                                                                                                                                                                                                                                                                                                                                                                                                                                                                                                                                                                                                                                                                                                                                                                                                                                                                                                                                                                                                                                                                                                                                                                                                                                                                                                                                                                                                                                                                                                                                                                                                                                                                                                                                                                                                                                                                                                                                                                                                                                                                                                                                                                                                                                                                                                                                                                                                                                                                                                                                                                                                                                                                                                                                                                                                                                                                                                                                                                                                                                                                                                                                                                                                                                                                                                                                                                                                                                                                                                                                                                                                                                                                                                                                                                                                                                                                                                                                                                                                                                                                                                                                                                                                                                                                                                                                                                                                                                                                                                                                                                                                                                                                                                                                                                                                                                                                                                                                                                                                                                                                                                                                                                                                                                                                                                                                                                                                                                                                                                                                                                                                                                                                                                                                                                                                                                                                                                                                                                                                                                                                                                                                                                                                                                                                                                                                                                                                                                                                                                                                                                                                                                                                                                                                                                                                                                                                                                                                                                                                                                                                                                                                                                                                                                                                                                                                                                                                                                                                                                                                                                                                                                                                                                                                                                                                                                                                                                                                                                                                                                                                                                                                                                                                                                                                                                                                                                                                                                                                                                                                          |                                                                                                                                                                                          |
|            | 22 | a | Strong consensus (78%). No changes.                                                                                                                                              | Lateral femoral cutaneous nerve block         | Injection at the lateral femoral cutaneous nerve medial to the tensor fascia lata and lateral to the sartorius muscle in a plane between the fascia lata and fascia iliaca, distal to the anterior superior iliac spine. Revision: Injection at the lateral femoral cutaneous nerve medial to the tensor fascia lata and lateral to the sartorius muscle in a plane between the fascia lata and lateral to the sartorius muscle in a plane between the fascia lata and lateral to the sartorius muscle in a plane between the fascia lata and lateral to the sartorius muscle in a plane between the fascia lata and lateral to the sartorius muscle in a plane between the fascia lata and lateral to the sartorius muscle in a plane between the fascia lata and lateral to the sartorius muscle in a plane between the fascia lata and lateral to the sartorius muscle in a plane between the fascia lata and lateral to the sartorius muscle in a plane between the fascia lata and lateral to the sartorius muscle in a plane between the fascia lata and lateral to the sartorius muscle in a plane between the fascia lata and lateral to the sartorius muscle in a plane between the fascia lata and lateral to the sartorius muscle in a plane between the fascia lata and lateral to the sartorius muscle in a plane between the fascia lata and lateral to the sartorius muscle in a plane between the fascia lata and lateral to the sartorius muscle in a plane between the fascia lata and lateral to the sartorius muscle in a plane between the fascia lata and lateral to the sartorius muscle in a plane between the fascia lata and lateral to the sartorius muscle in a plane between the fascia lata and lateral to the sartorius muscle in a plane between the fascia lata and lateral to the sartorius muscle in a plane between the fascia lata and lateral to the sartorius muscle in a plane between the fascia lata and lateral to the sartorius muscle in a plane between the fascia lata and lateral to the sartorius muscle in a plane between the fascia lata and lateral to the sartorius muscle in a plane between the fascia lata and lateral to the sartorius muscle in a plane between the fascia lata and lateral to the sartorius muscle in a plane between the fascia lata and lateral to the sartorius muscle in a plane between the fascia lata and lateral to the sartorius muscle in a plane between the fascia lata and lateral to the sartorius muscle in a plane between the fascia lata and lateral to the sartorius muscle in a plane between the fascia lata and lateral to the sartorius muscle in a plane between the fascia lata and lateral to the sartorius muscle in a plane between the fascia lata and lateral to the sartorius muscle in a plane between the fascia lata and lateral to the sartorius muscle in a plane between the fascia lata and lateral to the sartorius muscle in a plane between the fascia lata and lateral to the sartorius muscle in a plane between the fascia lata and lateral to the sartorius muscle in a plane between the fascia lata and lateral to the sartorius muscle in a plane between the fascia lata and lateral to the sartorius muscle in a plane between the fascia lata and lateral to the sartorius muscle in a plane between the fascia lata and lateral to the sartorius muscle in a plane between the fascia lata and lateral to the sartorius muscle in a plane between the fascia lata and lateral to the sartorius muscle in a plane between the fascia lata and lateral to the sartorius muscle in a plane between the fascia lata and lateral to the sartorius muscle in a plane between the fascia lata and lateral to the sartorius muscle in a plane between the fascia lata and lateral to the sartorius muscle in a plane between the fascia lata and lateral to the sartorius muscle in a plane between the fascia lata and lateral to the sartorius muscle in a plane between the fascia lata and lateral to the sartorius muscle in a plane between the fascia lata and lateral to the sartorius muscle in a plane between the fascia lata and lateral to the sartorius muscle in a plane between the fascia lata and lateral to the sartorius muscle in a plane between the fascia lata and lateral to the sartorius muscle in a plane between the fascia lata and lateral to the sartorius muscle in a plane between the fascia lata and lateral to the sartorius muscle in a plane between the fascia lata and lateral to the sartorius muscle in a plane between the fascia lata and lateral to the sartorius muscle in a plane between the fascia lata and lateral to the sartorius muscle in a plane between the fascia lata and lateral to the sartorius muscle in a plane between the fascia lata and lateral to the sartorius muscle in a plane between the fascia lata and lateral to the sartorius muscle in a plane between the fascia lata and lateral to the sartorius muscle in a plane between the fascia lata and lateral to the sartorius muscle in a plane between the fascia lata and lateral to the sartorius muscle in a plane between the fascia lata and lateral to the sartorius muscle in a plane between the fascia lata and lateral to the sartorius muscle in a plane between the fascia lata and lateral to the sartorius muscle in a plane between the fascia lata and lateral to the sartorius muscle in a plane between the fascia lata and lateral to the sartorius muscle in a plane between the fascia lata and lateral to the sartorius muscle in a plane between the fascia lata and lateral to the sartorius muscle in a plane between the fascia lata and lateral to the sartorius muscle in a plane between the fascia lata and lateral to the sartorius muscle in a plane between the fascia lata and lateral to the sartorius muscle in a plane between the fascia lata and lateral to the sartorius muscle in a plane between the fascia lata and lateral to the sartorius muscle in a plane between the fascia lata and lateral to the sartorius muscle in a plane between the fascia lata and lateral to the sartorius muscle in a plane between the fascia lata and lateral to the sartorius muscle in a plane between the fascia lata and lateral to the sartorius muscle in a plane between the fascia lata and lateral to the sartorius muscle in a plane between the fascia lata and lateral to the sartorius muscle in a plane between the fascia lata and lateral to the sartorius muscle in a plane between the fascia lata and lateral to the sartorius muscle in a plane between the fascia lata and lateral to the sartorius muscle in a plane between the fascia lata and lateral to the sartorius muscle in a plane between the fascia lata and lateral to the sartorius muscle in a plane between the fascia lata and lateral to the sartorius muscle in a plane between the fascia lata and lateral to the sartorius muscle in a plane between the fascia lata and lateral to the sartorius muscle in a plane between the fascia lata and lateral to the sartorius muscle in a plane between the fascia lata and lateral to the sartorius muscle in a plane between the fascia lata and lateral to the sartorius muscle in a plane between the fascia lata and lateral to the sartorius muscle in a plane between the fascia lata and lateral to the sartorius muscle in a plane between the fascia lata and lateral to the sartorius muscle in a plane between the fascia lata and lateral to the sartorius muscle in a plane between the fascia lata and lateral to the sartorius muscle in a plane between the fascia lata and lateral to the sartorius muscle in a plane between the fascia lata and lateral to the sartorius muscle in a plane between the fascia lata and lateral to the sartorius muscle in a plane between the fascia lata and lateral to the sartorius muscle in a plane between the fascia lata and lateral to the sartorius muscle in a plane between the fascia lata and lateral to the sartorius muscle in a plane between the fascia lata and lateral to the sartorius muscle in a plane between the fascia lata and lateral to the sartorius muscle in a plane between the fascia lata and lateral to the sartorius muscle in a plane between the fascia lata and lateral to the sartorius muscle in a plane between the fascia lata and lateral to the sartorius muscle in a plane between the fascia lata and lateral to the sartorius muscle in a plane between the fascia lata and lateral to the sartorius muscle in a plane between the fascia lata and lateral to the sartorius muscle in a plane between the fascia lata and lateral to the sartorius muscle in a plane between the fascia lata and lateral to the sartorius muscle in a plane between the fascia lata and lateral to the sartorius muscle in a plane between the fascia lata and lateral to the sartorius muscle in a plane between the fascia lata and lateral to the sartorius muscle in a plane between the fascia lata and lateral to the sartorius muscle in a plane between the fascia lata and lateral to the sartorius muscle in a plane between the fascia lata and lateral to the sartorius muscle in a plane between the fascia lata and lateral to the sartorius muscle in a plane between the fascia lata and lateral to the sartorius muscle in a plane between the fascia lata and lateral to the sartorius muscle in a plane between the fascia lata and lateral to the sartorius muscle in a plane between the fascia lata and lateral to the sartorius muscle in a plane between the fascia lata and lateral to the sartorius muscle in a plane between the fascia lata and lateral to the sartorius muscle in a plane between the fascia lata and lateral to the sartorius |                                                                                                                                                                                          |

|    |    |                                                                                                                                                                        |                                             |                                                                                                                                                                                                                                                                                                                                                                                                                                                                                                                                                             |                                                                                                                               |
|----|----|------------------------------------------------------------------------------------------------------------------------------------------------------------------------|---------------------------------------------|-------------------------------------------------------------------------------------------------------------------------------------------------------------------------------------------------------------------------------------------------------------------------------------------------------------------------------------------------------------------------------------------------------------------------------------------------------------------------------------------------------------------------------------------------------------|-------------------------------------------------------------------------------------------------------------------------------|
| 31 | a  | <b>Weak consensus for infragluteal sciatic nerve block (57%), and sciatic block in the mid thigh (73%). Harmonized to Sciatic nerve block (Infragluteal approach).</b> | Sciatic nerve block (Infragluteal approach) | Revision:<br>Injection of the sciatic nerve at the midthigh region distal to the inferior border of the gluteus maximus muscle.                                                                                                                                                                                                                                                                                                                                                                                                                             | Weak consensus (70%) but may achieve consensus with harmonized name. Revised to reflect distal location of block.             |
|    | 32 |                                                                                                                                                                        | Sciatic nerve block (Anterior approach)     | Injection of the sciatic nerve between the adductor magnus anteriorly and gluteus maximus or biceps femoris muscles.                                                                                                                                                                                                                                                                                                                                                                                                                                        | Strong consensus (76%). No changes                                                                                            |
| 33 | a  | <b>Strong consensus (90%) but proposal to revise to be consistent with Clarifying question 3.</b>                                                                      | Popliteal sciatic nerve block               | Injection of the sciatic nerve at or near the point of bifurcation in the popliteal fossa                                                                                                                                                                                                                                                                                                                                                                                                                                                                   | Strong consensus (89%). No changes                                                                                            |
|    | b  |                                                                                                                                                                        | Sciatic nerve block at the popliteal fossa  |                                                                                                                                                                                                                                                                                                                                                                                                                                                                                                                                                             |                                                                                                                               |
| 34 | a  | <b>Weak consensus (70%) but proposal to revise to be consistent with Clarifying question 3</b>                                                                         | Selective tibial nerve block                | Injection of the tibial nerve distal to the sciatic nerve bifurcation                                                                                                                                                                                                                                                                                                                                                                                                                                                                                       | Strong consensus (88%). No changes                                                                                            |
|    | b  |                                                                                                                                                                        | Tibial nerve block at the popliteal fossa   |                                                                                                                                                                                                                                                                                                                                                                                                                                                                                                                                                             |                                                                                                                               |
| 35 | a  | <b>Strong consensus (76%) but proposal to revise to be consistent with Clarifying question 3 and to clarify that there is no posterior tibial nerve</b>                | Posterior tibial nerve block                | Injection of the posterior tibial nerve proximal to medial malleolus, the tendons of the tibialis anterior and flexor digitorum profundus are anterior to the nerve and gastrocnemius-soleus posterior to it. The posterior tibial artery injection at the distal nerve proximal to tarsal tunnel; the tendons of the tibialis anterior and flexor digitorum profundus are anterior to the nerve and gastrocnemius-soleus posterior to it. The posterior tibial artery and the tendon of flexor hallucis longus lie deep to the nerve, often with the small | Revised to reflect the change of the name of the nerve from posterior tibial to tibial nerve, despite strong consensus (76%). |
|    | b  |                                                                                                                                                                        | Tibial nerve block at the ankle             |                                                                                                                                                                                                                                                                                                                                                                                                                                                                                                                                                             |                                                                                                                               |
| 36 |    | <b>New proposal</b>                                                                                                                                                    | Nerve to vastus medialis block              | Injection of the nerve to vastus medialis where it is located deep to the sartorius and lateral to the saphenous nerve and femoral vessels in the femoral triangle                                                                                                                                                                                                                                                                                                                                                                                          |                                                                                                                               |

Standardising nomenclature in regional anaesthesia: an international Delphi consensus study

[BACK TO CONTENTS](#)

Delphi study Round 1 RESULTS

| REGION     | NAME                                                               | Agree | Unsure | Disagree | Decision (Name)                                                            | DESCRIPTION (anatomical location of injection)                                                                                                                                              | Agree | Unsure | Disagree | Decision (Anatomical description)                                                                                           |                             |
|------------|--------------------------------------------------------------------|-------|--------|----------|----------------------------------------------------------------------------|---------------------------------------------------------------------------------------------------------------------------------------------------------------------------------------------|-------|--------|----------|-----------------------------------------------------------------------------------------------------------------------------|-----------------------------|
| UPPER LIMB | 1 Interscalene block                                               | 66%   | 3%     | 31%      | HARMONISE: with interscalene brachial plexus                               | Injection around C5 and C6 nerve roots below C6 level in the interscalene groove.                                                                                                           | 47%   | 13%    | 40%      | REVISE: Injection at the C5 and C6 nerve roots between anterior and middle scalene muscles                                  |                             |
|            | 2 Interscalene block                                               | 66%   | 4%     | 27%      | HARMONISE: with interscalene brachial plexus                               | Injection within the brachial plexus sheath in between the C5 and C6 nerve roots.                                                                                                           | 37%   | 11%    | 52%      | REVISE: Injection at the C5 and C6 nerve roots between anterior and middle scalene muscles                                  |                             |
|            | 3 Interscalene block                                               | 62%   | 4%     | 34%      | HARMONISE: with interscalene brachial plexus                               | Injection 4 mm lateral to the brachial plexus sheath, at a level equidistant between C5 and C6 roots.                                                                                       | 19%   | 12%    | 69%      | REVISE: Injection at the C5 and C6 nerve roots between anterior and middle scalene muscles                                  |                             |
|            | 4 Interscalene brachial plexus block                               | 71%   | 9%     | 20%      | ACCEPT                                                                     | Injection at the C5 and C6 nerve roots                                                                                                                                                      | 54%   | 9%     | 36%      | REVISE: Injection at the C5 and C6 nerve roots between anterior and middle scalene muscles                                  |                             |
|            | 5 Interscalene block                                               | 66%   | 7%     | 27%      | HARMONISE: with interscalene brachial plexus                               | Injection 1–2 mm lateral to the C5–C6 root at the interscalene groove                                                                                                                       | 32%   | 14%    | 54%      | REVISE: Injection at the C5 and C6 nerve roots between anterior and middle scalene muscles                                  |                             |
|            | 6 Posterior interscalene block                                     | 26%   | 11%    | 63%      | HARMONISE: with interscalene brachial plexus                               | Injection at the posterior aspect of the brachial plexus at the C5/C6 level                                                                                                                 | 45%   | 13%    | 42%      | REVISE: Injection at the C5 and C6 nerve roots between anterior and middle scalene muscles                                  |                             |
|            | 7 C5,C6 nerve root block                                           | 30%   | 7%     | 58%      | EXCLUDE: area for further research                                         | Injection around C5 and C6 nerve roots                                                                                                                                                      | 71%   | 4%     | 24%      | EXCLUDE: area for further research                                                                                          |                             |
|            | 8 Superior trunk block                                             | 84%   | 7%     | 10%      | ACCEPT                                                                     | Injection at the superior trunk after the fusion of C5 and C6 nerve roots outside interscalene groove before the suprascapular nerve originates                                             | 73%   | 9%     | 16%      | REVISE: Injection at the superior trunk                                                                                     | DISCUSS WITH STEERING GROUP |
|            | 9 Superior trunk block                                             | 75%   | 7%     | 19%      | ACCEPT                                                                     | Injection in the anterior part of the superior trunk                                                                                                                                        | 10%   | 13%    | 77%      | REVISE: Injection at the superior trunk after the fusion of C5 and C6 nerve roots before the suprascapular nerve emerges    | DISCUSS WITH STEERING GROUP |
|            | 10 Upper trunk block                                               | 34%   | 10%    | 56%      | HARMONISE: with superior trunk block                                       | Injection at the superior trunk after the fusion of C5 and C6 nerve roots outside interscalene groove before the suprascapular nerve originates                                             | 62%   | 14%    | 23%      | REVISE: Injection at the superior trunk before the suprascapular nerve emerges                                              | DISCUSS WITH STEERING GROUP |
|            | 11 Suprascapular block                                             | 51%   | 9%     | 41%      | HARMONISE: with suprascapular brachial plexus                              | Injection outside the plexus including the corner pocket above the first rib.                                                                                                               | 27%   | 17%    | 57%      | HARMONISE: with BELOW                                                                                                       |                             |
|            | 12 Suprascapular brachial plexus block                             | 76%   | 8%     | 16%      | ACCEPT                                                                     | Injection around the divisions and trunks of the brachial plexus                                                                                                                            | 63%   | 9%     | 28%      | REVISE: Injection at the divisions of the brachial plexus                                                                   |                             |
|            | 13 Suprascapular brachial plexus nerve block                       | 33%   | 15%    | 52%      | HARMONISE: with suprascapular brachial plexus                              | Injection within the brachial plexus sheath posterior to the subclavian artery and around the trunks and divisions of the brachial plexus                                                   | 71%   | 11%    | 18%      | REVISE: Injection at the divisions of the brachial plexus immediately caudal to the axillary                                |                             |
|            | 14 Cervical plexus block                                           | 43%   | 19%    | 38%      | EXCLUDE: Superficial or Deep                                               | Injection superficial, deep or intermediate based on the relationship to sternocleidomastoid at the level of C4 Erb's point                                                                 | 36%   | 22%    | 42%      | EXCLUDE: Superficial or Deep                                                                                                |                             |
|            | 15 Superficial cervical plexus block                               | 80%   | 3%     | 7%       | ACCEPT                                                                     | Injection superficial to the investing fascia at the midpoint of the posterior border of sternocleidomastoid muscle                                                                         | 89%   | 9%     | 7%       | ACCEPT: Injection superficial to the investing fascia at the midpoint of the posterior border of sternocleidomastoid muscle |                             |
|            | 16 Anterior cervical cutaneous branches block of cervical plexus   | 25%   | 23%    | 52%      | EXCLUDE: area for further research                                         | Injection from the midpoint of sternocleidomastoid muscle to the claviculohumeral attachment subcutaneously                                                                                 | 37%   | 33%    | 30%      | EXCLUDE: area for further research                                                                                          |                             |
|            | 17 Deep cervical plexus block                                      | 85%   | 11%    | 4%       | ACCEPT                                                                     | Injection adjacent to one of more of the transverse processes of C2, 3, and 4, (e.g. a paravertebral technique), deep to the prevertebral fascia                                            | 89%   | 7%     | 4%       | Injection adjacent to one of more of the transverse processes of C2, 3, and 4, deep to the prevertebral fascia              | DISCUSS WITH STEERING GROUP |
|            | 18 Intermediate cervical plexus block                              | 51%   | 27%    | 22%      | ACCEPT                                                                     | Injection deep to investing fascia of neck, but superficial to prevertebral fascia                                                                                                          | 63%   | 25%    | 12%      | ACCEPT: Injection deep to the investing fascia at the midpoint of the posterior border of sternocleidomastoid muscle        |                             |
|            | 19 Intermediate cervical plexus block- anterior approach           | 17%   | 34%    | 49%      | HARMONISE: with intermediate cervical plexus                               | Injection into the carotid sheath and the intermuscular plane in the posterior cervical space, beneath the sternocleidomastoid muscle                                                       | 29%   | 34%    | 37%      | HARMONISE: with Above                                                                                                       |                             |
|            | 20 Infraclavicular block                                           | 60%   | 7%     | 33%      | HARMONISE: with infraclavicular brachial plexus block                      | Injection of cords of the brachial plexus to surround the axillary artery in an U-shaped pattern (superolateral, caudal, and posterior)                                                     | 57%   | 13%    | 30%      | REVISE: Injection at the cords of the brachial plexus                                                                       |                             |
|            | 21 Infraclavicular brachial plexus block                           | 78%   | 8%     | 14%      | ACCEPT                                                                     | Injection around the cords of the brachial plexus                                                                                                                                           | 66%   | 8%     | 26%      | REVISE: Injection at the cords of the brachial plexus                                                                       |                             |
|            | 22 Infraclavicular brachial plexus block                           | 77%   | 8%     | 16%      | ACCEPT                                                                     | Injection posterior to the axillary artery with the intention of achieving a U shaped distribution around the artery.                                                                       | 46%   | 14%    | 40%      | REVISE: Injection at the cords of the brachial plexus                                                                       |                             |
|            | 23 Infraclavicular brachial plexus block                           | 73%   | 8%     | 19%      | CONSIDER: Infraclavicular brachial plexus block (infraclavicular approach) | Injection at the 6 o'clock position of the axillary artery.                                                                                                                                 | 19%   | 22%    | 59%      | REVISE: Injection at the cords of the brachial plexus                                                                       |                             |
|            | 24 Axillary block                                                  | 41%   | 7%     | 52%      | HARMONISE: with axillary brachial plexus block                             | Injection deep to the axillary artery, at the 6 o'clock position, instead of targeting the three nerves individually                                                                        | 12%   | 15%    | 73%      | REVISE: Injection at the branches of the brachial plexus                                                                    | DISCUSS WITH STEERING GROUP |
|            | 25 Axillary brachial plexus block                                  | 73%   | 8%     | 21%      | ACCEPT                                                                     | Injection around the radial, median and ulnar nerves.                                                                                                                                       | 19%   | 11%    | 70%      | REVISE: Injection at the branches of the brachial plexus                                                                    | DISCUSS WITH STEERING GROUP |
|            | 26 Axillary brachial plexus block                                  | 80%   | 2%     | 18%      | ACCEPT                                                                     | Injection around all four nerves in the axillary region.                                                                                                                                    | 63%   | 4%     | 32%      | REVISE: Injection at the branches of the brachial plexus                                                                    | DISCUSS WITH STEERING GROUP |
|            | 27 Axillary nerve block                                            | 86%   | 7%     | 8%       | ACCEPT                                                                     | Injection of the axillary nerve in the upper humerus exiting the quadrangular space                                                                                                         | 70%   | 11%    | 19%      | REVISE: Injection at the axillary nerve <SPECIFY LOCATION>                                                                  | DISCUSS WITH STEERING GROUP |
|            | 28 Axillary nerve block (posterior)                                | 40%   | 10%    | 50%      | HARMONISE: with axillary nerve block                                       | Injection just cranial to the posterior circumflex humeral artery but under the muscle fascia                                                                                               | 48%   | 22%    | 30%      | HARMONISE: with Above                                                                                                       |                             |
|            | 29 Midhumeral block                                                | 63%   | 12%    | 24%      | (Individual nerves block) PERIPHERAL NERVE BLOCK                           | Injection around the median, ulnar and radial nerves individually at the junction of the upper third and middle third of the arm.                                                           | 78%   | 7%     | 16%      | PERIPHERAL NERVE BLOCK                                                                                                      |                             |
|            | 30 Suprascapular nerve block anterior approach                     | 82%   | 8%     | 10%      | (Individual nerves block) PERIPHERAL NERVE BLOCK                           | Injection of the suprascapular nerve coming off superior trunk and travelling to posterior neck under the posterior belly of Omohyoid muscle                                                | 87%   | 5%     | 8%       | PERIPHERAL NERVE BLOCK                                                                                                      |                             |
|            | 31 Suprascapular nerve posterior approach                          | 78%   | 10%    | 12%      | PERIPHERAL NERVE BLOCK                                                     | Injection of the suprascapular nerve in the suprascapular notch or suprascapular fossa                                                                                                      | 86%   | 9%     | 5%       | PERIPHERAL NERVE BLOCK                                                                                                      |                             |
|            | 32 Subomohyoid Suprascapular (SOS) block                           | 32%   | 28%    | 40%      | EXCLUDE: Existing techniques                                               | Suprascapular nerve coming off superior trunk and travelling to posterior neck under the posterior belly of omohyoid muscle                                                                 | 69%   | 18%    | 13%      | EXCLUDE: Existing techniques                                                                                                |                             |
|            | 33 Shoulder block                                                  | 22%   | 17%    | 61%      | EXCLUDE: Existing techniques                                               | Injection of the axillary nerve and suprascapular nerve (posterior approach)                                                                                                                | 49%   | 15%    | 35%      | EXCLUDE: Existing techniques                                                                                                |                             |
|            | 34 Shoulder block including lateral pectoral nerve block           | 17%   | 19%    | 64%      | EXCLUDE: Existing techniques                                               | Injection around the axillary nerve, suprascapular nerve posteriorly and lateral pectoral nerve anteriorly                                                                                  | 52%   | 18%    | 30%      | EXCLUDE: Existing techniques                                                                                                |                             |
|            | 35 Forearm block                                                   | 46%   | 16%    | 39%      | PERIPHERAL NERVE BLOCK                                                     | Injection of the median, ulnar, radial nerves at the level of elbow                                                                                                                         | 64%   | 4%     | 32%      | PERIPHERAL NERVE BLOCK                                                                                                      |                             |
|            | 36 Retroclavicular block                                           | 28%   | 20%    | 52%      | REVISE: Infraclavicular brachial plexus block (Retroclavicular approach)   | Injection of the cords of the brachial plexus using a needle insertion point in the suprascapular fossa, behind the clavicle until the needle tip is positioned behind the axillary artery. | 65%   | 16%    | 19%      | REVISE: Injection at the cords of the brachial plexus                                                                       | DISCUSS WITH STEERING GROUP |
|            | 37 Retroclavicular brachial plexus block                           | 47%   | 17%    | 37%      | REVISE: Infraclavicular brachial plexus block (Retroclavicular approach)   | Injection of the cords of the brachial plexus using a needle insertion point in the suprascapular fossa, behind the clavicle until the needle tip is positioned behind the axillary artery. | 70%   | 15%    | 14%      | REVISE: Injection at the cords of the brachial plexus                                                                       | DISCUSS WITH STEERING GROUP |
|            | 38 Retroclavicular approach to the infraclavicular region (RAP(R)) | 39%   | 18%    | 43%      | REVISE: Infraclavicular brachial plexus block (Retroclavicular approach)   | Injection of the cords of the brachial plexus using a needle insertion point in the suprascapular fossa, behind the clavicle until the needle tip is positioned behind the axillary artery. | 68%   | 14%    | 16%      | REVISE: Injection at the cords of the brachial plexus                                                                       | DISCUSS WITH STEERING GROUP |
|            | 39 Costoclavicular block                                           | 34%   | 16%    | 50%      | REVISE: Infraclavicular brachial plexus block (Costoclavicular approach)   | Injection at the brachial plexus in the proximal infra-clavicular fossa, where the lateral, medial, and posterior cords are tightly bundled                                                 | 76%   | 13%    | 11%      | REVISE: Injection at the cords of the brachial plexus                                                                       | DISCUSS WITH STEERING GROUP |
|            | 40 Costoclavicular brachial plexus block                           | 66%   | 17%    | 18%      | REVISE: Infraclavicular brachial plexus block (Costoclavicular approach)   | Injection at the brachial plexus in the proximal infra-clavicular fossa, where the lateral, medial, and posterior cords are tightly bundled                                                 | 82%   | 10%    | 8%       | REVISE: Injection at the cords of the brachial plexus                                                                       | DISCUSS WITH STEERING GROUP |

|            |    |                                                              |     |     |     |                                                                                  |                                                                                                                                                                                                                                                                                                                                                                                                                            |     |     |     |                                                                                    |
|------------|----|--------------------------------------------------------------|-----|-----|-----|----------------------------------------------------------------------------------|----------------------------------------------------------------------------------------------------------------------------------------------------------------------------------------------------------------------------------------------------------------------------------------------------------------------------------------------------------------------------------------------------------------------------|-----|-----|-----|------------------------------------------------------------------------------------|
| LOWER LIMB | 41 | Wrist block                                                  | 65% | 7%  | 25% | PERIPHERAL NERVE BLOCK                                                           | Injection of the median, ulnar and radial nerves at the level of the wrist by separate injections                                                                                                                                                                                                                                                                                                                          | 78% | 4%  | 18% | PERIPHERAL NERVE BLOCK                                                             |
|            | 42 | Intercostobrachial nerve block                               | 79% | 9%  | 12% | PERIPHERAL NERVE BLOCK                                                           | Injection 2-3 cm distal to the axillary crease in an anterior-posterior distribution approximately 3-5 cm wide between the brachio and the triceps muscles                                                                                                                                                                                                                                                                 | 50% | 17% | 33% | PERIPHERAL NERVE BLOCK                                                             |
|            | 43 | Intercostobrachial and medial cutaneous brachial nerve block | 59% | 20% | 21% | PERIPHERAL NERVE BLOCK                                                           | Injection in the subcutaneous area located above the brachial fascia, with a posterior direction, toward the latissimus dorsi muscle                                                                                                                                                                                                                                                                                       | 47% | 30% | 23% | PERIPHERAL NERVE BLOCK                                                             |
|            | 44 | Intercostobrachial nerve block                               | 72% | 13% | 14% | PERIPHERAL NERVE BLOCK                                                           | Injection around the intercostobrachial nerve posterior to lateral border of the pectoralis major muscle, superior, and posterior to the axillary vein.                                                                                                                                                                                                                                                                    | 42% | 32% | 26% | PERIPHERAL NERVE BLOCK                                                             |
|            | 45 | Posterior lumbar plexus block                                | 31% | 12% | 56% | Harmonize with lumbar plexus block                                               | Injection inside the posteromedial quadrant of the psoas muscle                                                                                                                                                                                                                                                                                                                                                            | 42% | 11% | 47% | Revised                                                                            |
|            | 46 | Lumbar plexus block                                          | 88% | 6%  | 7%  | Accept                                                                           | Injection at the level of the lumbar root L2-L4 crossing in the posterior third of the psoas muscle                                                                                                                                                                                                                                                                                                                        | 80% | 9%  | 11% | Revised                                                                            |
|            | 47 | Psoas compartment block                                      | 44% | 15% | 41% | Harmonize with lumbar plexus block                                               | Injection at the estimated position of the lumbar plexus (junction of the posterior third and the anterior two thirds of the psoas muscle                                                                                                                                                                                                                                                                                  | 56% | 14% | 30% | Revised                                                                            |
|            | 48 | Lumbar paravertebral block                                   | 55% | 18% | 25% | Harmonize with lumbar plexus block                                               | Walking off the transverse process of the appropriate lumbar vertebra and penetrating the fascia surrounding the quadratus lumborum muscle                                                                                                                                                                                                                                                                                 | 42% | 22% | 36% | Revised                                                                            |
|            | 49 | Femoral nerve block                                          | 98% | 1%  | 1%  | Accept                                                                           | Injection at the femoral nerve cephalad to the bifurcation of the femoral artery, distal to the inguinal ligament and deep to both fascia lata and deep fascia, over the surface of the iliacus muscle                                                                                                                                                                                                                     | 92% | 2%  | 5%  | Revised                                                                            |
|            | 50 | 3-in-1 block                                                 | 17% | 7%  | 76% | Exclude: very low consensus to support                                           | Inject the femoral nerve cephalad to the bifurcation of the femoral artery, distal to the inguinal ligament and deep to both fascia lata and deep fascia, over the surface of the iliacus muscle                                                                                                                                                                                                                           | 29% | 12% | 59% | Revised                                                                            |
|            | 51 | Fascia iliac block                                           | 56% | 8%  | 36% | Accept                                                                           | Injection under the fascia iliac                                                                                                                                                                                                                                                                                                                                                                                           | 45% | 9%  | 46% | Accept                                                                             |
|            | 52 | Fascia iliac block - supra-inguinal                          | 92% | 6%  | 2%  | Accept                                                                           | Injection deep to the fascia iliac over the surface of the iliacus muscle, superiorly and medially to the anterior superior iliac spine, proximal to the inguinal ligament                                                                                                                                                                                                                                                 | 91% | 5%  | 3%  | Revised                                                                            |
|            | 53 | Fascia iliac block - infra-inguinal                          | 88% | 8%  | 4%  | Accept                                                                           | Injection deep to the fascia iliac, over the surface of the iliacus muscle, and lateral to the femoral nerve, distal to the inguinal ligament                                                                                                                                                                                                                                                                              | 93% | 4%  | 2%  | Revised                                                                            |
|            | 54 | Lateral femoral cutaneous nerve block                        | 79% | 2%  | 19% | Accept                                                                           | Injection at the lateral femoral cutaneous nerve medial to the tensor fascia lata and lateral to the sartorius muscle in a plane between the fascia lata and fascia iliac distal to the anterior superior iliac spine                                                                                                                                                                                                      | 87% | 3%  | 10% | Revised                                                                            |
|            | 55 | Posterior femoral cutaneous nerve block                      | 85% | 10% | 10% | Accept                                                                           | to the sciatic nerve in the subgluteal region, and immediately deep to the gluteus maximus and fascia lata.                                                                                                                                                                                                                                                                                                                | 59% | 29% | 12% | Revised                                                                            |
|            | 56 | Obturator nerve block                                        | 78% | 7%  | 16% | Accept                                                                           | posterior divisions in the plane between the pectineus and obturator externus muscles branches of the obturator nerve in the upper medial thigh as they lie anteriorly and posteriorly to the adductor brevis muscle                                                                                                                                                                                                       | 81% | 11% | 8%  | Revised                                                                            |
|            | 57 | Distal obturator nerve block                                 | 36% | 26% | 38% | Harmonize with anterior and posterior Obturator Nerve                            | The anterior and posterior branches of the obturator nerve are then blocked by two injections of local anesthetic directed toward the interfascial planes where each branch lies at the inguinal crease.                                                                                                                                                                                                                   | 44% | 29% | 27% | Harmonize with the description of the branches of the Obturator nerve block        |
|            | 58 | Anterior obturator nerve block                               | 70% | 13% | 17% | Revised (CNB Anterior Division Nerve block)                                      | Injection of the anterior division of the obturator nerve between the adductor longus, adductor brevis and pectineus muscle                                                                                                                                                                                                                                                                                                | 82% | 9%  | 9%  | Accept                                                                             |
|            | 59 | Posterior obturator nerve block                              | 71% | 13% | 16% | Revised (CNB Posterior Division Nerve block)                                     | Injection of the posterior division of obturator nerve between the adductor brevis and adductor magnus muscles                                                                                                                                                                                                                                                                                                             | 86% | 8%  | 7%  | Accept                                                                             |
|            | 60 | Proximal obturator nerve block                               | 52% | 22% | 26% | Harmonize with Obturator Nerve block (56)                                        | Injection into the fascial plane between the pectineus and obturator externus muscles (Harmonize with 56)                                                                                                                                                                                                                                                                                                                  | 65% | 24% | 11% | Harmonize with the description of the Obturator nerve block                        |
|            | 61 | Genitofemoral nerve block                                    | 87% | 6%  | 8%  | Accept                                                                           | medial and superficial to the femoral artery in the inguinal canal. The contents of the inguinal canal are identified, with testicular vessels located laterally and spermatic cord medially. The needle is advanced in                                                                                                                                                                                                    | 57% | 34% | 9%  | Revised                                                                            |
|            | 62 | Pudendal nerve block                                         | 85% | 11% | 3%  | Accept                                                                           | Injection of the pudendal nerve medial to the pudendal artery between the sacrotuberous and sacrotuberous ligaments at the level of ischial spine                                                                                                                                                                                                                                                                          | 79% | 28% | 1%  | Accept                                                                             |
|            | 63 | Alcock's canal block                                         | 22% | 43% | 35% | Exclude: very low consensus to support                                           | Injection of the pudendal nerve inside the Alcock canal by following the margin of the hip bone sonographically along the greater ischial notch, the ischial spine, and the lesser sciatic notch.                                                                                                                                                                                                                          | 43% | 45% | 12% | Exclude: Very low consensus to support                                             |
|            | 64 | Anterior pudendal nerve block                                | 28% | 47% | 25% | Exclude: very low consensus to support                                           | Injection of the pudendal nerve in the anterior perineal region, with the inguinal medial pudendal artery in the plane between the medial and proximal to the apex of the femoral triangle. The apex of the femoral triangle is the point where the medial borders of the sartorius and adductor longus muscles cross.                                                                                                     | 46% | 48% | 6%  | Exclude: Very low consensus to support                                             |
|            | 65 | Femoral triangle block                                       | 60% | 16% | 25% | Accept                                                                           | apex of femoral triangle. Sonography of this region shows adductor longus muscle posteromedially, vastus medialis muscle anterolaterally, and sartorius muscle medially (Figure 38). In this region, there is no distal to the apex of the femoral triangle and proximal to the adductor heads. The apex of the femoral triangle is the point where the medial borders of the sartorius and adductor longus muscles cross. | 71% | 12% | 16% | Accept                                                                             |
|            | 66 | Distal femoral triangle block                                | 40% | 20% | 39% | Harmonize with the femoral triangle block                                        | apex of the femoral triangle, which blocks the saphenous nerve, the nerve to the vastus medialis muscle, and the medial femoral cutaneous nerve.                                                                                                                                                                                                                                                                           | 52% | 14% | 34% | Harmonize with the description of the femoral triangle block                       |
|            | 67 | Adductor canal block                                         | 80% | 7%  | 8%  | Accept                                                                           | Injection where the superficial femoral artery is underneath the medial third of the sartorius muscle                                                                                                                                                                                                                                                                                                                      | 80% | 7%  | 13% | Accept                                                                             |
|            | 68 | Subsartorial femoral nerve block in the femoral triangle     | 28% | 22% | 51% | Harmonize with the femoral triangle block                                        | Injection where the superficial femoral artery is underneath the medial third of the sartorius muscle                                                                                                                                                                                                                                                                                                                      | 60% | 16% | 24% | Harmonize with the description of the femoral triangle block                       |
|            | 69 | Proximal adductor canal block                                | 36% | 17% | 47% | Harmonize with the femoral triangle block                                        | Injection where the superficial femoral artery is underneath the medial third of the sartorius muscle                                                                                                                                                                                                                                                                                                                      | 39% | 17% | 44% | Harmonize with the description of the femoral triangle block                       |
|            | 70 | Distal adductor canal block                                  | 33% | 16% | 51% | Harmonize with the femoral triangle block                                        | Injection where the superficial femoral artery is underneath the medial third of the sartorius muscle                                                                                                                                                                                                                                                                                                                      | 30% | 14% | 56% | Harmonize with the description of the femoral triangle block                       |
|            | 71 | Saphenous nerve block at the knee                            | 74% | 7%  | 19% | Revised to Saphenous nerve block (at the level of the adductor canal)            | Injection in the saphenous nerve deep to the sartorius muscle and posterior to the saphenous branch of the descending genicular artery.                                                                                                                                                                                                                                                                                    | 69% | 11% | 20% | Revised                                                                            |
|            | 72 | Infrapatellar nerve block                                    | 76% | 11% | 13% | Harmonize with the infrapatellar nerve block (73)                                | nerve itself. Under ultrasound guidance, the block targets the infrapatellar branch immediately after it emerges on either side of the sartorius muscle or at its origin in this muscle.                                                                                                                                                                                                                                   | 53% | 31% | 16% | Harmonize with the description of the infrapatellar nerve block                    |
|            | 73 | Infrapatellar nerve block                                    | 75% | 13% | 13% | Accept                                                                           | Injection around infrapatellar branch in the superficial fascial layer between sartorius and vastus medialis distal to exit from adductor canal                                                                                                                                                                                                                                                                            | 49% | 34% | 17% | Accept                                                                             |
|            | 74 | Medial retinacular nerve block                               | 49% | 32% | 19% | Exclude: very low consensus to support                                           | Injection of the medial retinacular nerve inside the fascial tunnel containing the nerve between the sartorius muscle and the medial vastus muscle                                                                                                                                                                                                                                                                         | 47% | 43% | 10% | Exclude: very low consensus to support                                             |
|            | 75 | Pericapsular nerve group (PENG) block                        | 75% | 10% | 15% | Accept                                                                           | femoral artery, and pectineus muscle are imaged. Injection in the musculofascial plane between the psoas tendon anteriorly and the pubic ramus posteriorly.                                                                                                                                                                                                                                                                | 90% | 4%  | 6%  | Revised                                                                            |
|            | 76 | Sacral plexus (lateral approach)                             | 45% | 26% | 28% | Harmonize and revise to Sacral plexus block                                      | scatic foramen and inferiorly to the perforans muscle.                                                                                                                                                                                                                                                                                                                                                                     | 54% | 27% | 19% | Harmonize with the description of the Sacral plexus block                          |
|            | 77 | Para-sacral block                                            | 67% | 19% | 14% | Harmonize and revise to Sacral plexus block                                      | (The probe placed at the level of the anterior superior iliac spine with its injection of the sacral plexus just medial to the posterior border of the sacrum. The plexus lies deep to the perforans muscle lateral to the inferior gluteal vessels                                                                                                                                                                        | 70% | 17% | 13% | Accept                                                                             |
|            | 78 | Transgluteal sciatic block                                   | 60% | 16% | 24% | Harmonize and revise to Sciatic nerve block (transgluteal approach)              | An injection around the proximal sciatic nerve anterior to the gluteus maximus muscle.                                                                                                                                                                                                                                                                                                                                     | 73% | 12% | 14% | Accept                                                                             |
|            | 79 | Anterior sciatic nerve block                                 | 81% | 6%  | 14% | Harmonize and revise to Sciatic nerve block (Anterior approach)                  | Injection at the sciatic nerve between the adductor magnus above and gluteus maximus or biceps femoris muscles.                                                                                                                                                                                                                                                                                                            | 76% | 12% | 12% | Accept                                                                             |
|            | 80 | Infragluteal sciatic nerve block                             | 57% | 11% | 32% | Harmonize and revise to Infragluteal sciatic nerve block                         | Injection at the sciatic nerve deep to the gluteus maximus muscle.                                                                                                                                                                                                                                                                                                                                                         | 54% | 12% | 33% | Accept                                                                             |
|            | 81 | Subgluteal Sciatic block                                     | 66% | 14% | 20% | Harmonize and revise to Infragluteal sciatic nerve block (Transgluteal approach) | the gluteus maximus and the quadratus femoris muscles. It extended from the greater trochanter laterally to the ischial tuberosity medially. The medial third of the subgluteal space was difficult to see. At this level, the                                                                                                                                                                                             | 70% | 17% | 13% | Harmonized with the description of the sciatic nerve block (transgluteal approach) |
|            | 82 | Sciatic block in the mid thigh                               | 73% | 6%  | 22% | Harmonize and revise to Sciatic nerve block (Infragluteal approach)              | Injection of the sciatic nerve at the mid thigh region distal to the inferior border of the gluteus maximus muscle.                                                                                                                                                                                                                                                                                                        | 70% | 19% | 11% | Harmonized with the description of the sciatic nerve block (infragluteal approach) |
|            | 83 | Popliteal sub-paraneural sciatic nerve block                 | 38% | 11% | 51% | Harmonize                                                                        | Injection of the sciatic nerve in the popliteal fossa at the point of bifurcation, through a common paraneural sheath                                                                                                                                                                                                                                                                                                      | 71% | 9%  | 20% | Harmonized with the description of the sciatic nerve block at the popliteal fossa  |
|            | 84 | Distal popliteal sciatic nerve block                         | 44% | 7%  | 49% | Harmonize                                                                        | Injection of both common peroneal and tibial nerves in the popliteal fossa, distal to sciatic nerve bifurcation                                                                                                                                                                                                                                                                                                            | 69% | 7%  | 25% | Harmonized with the description of the sciatic nerve block at the popliteal fossa  |

|                                |                                                                              |        |     |     |                                                                            |                                                                                                                                                                                                                                           |                                                                                                                                                                                                       |     |     |                                                                                                                                                                  |
|--------------------------------|------------------------------------------------------------------------------|--------|-----|-----|----------------------------------------------------------------------------|-------------------------------------------------------------------------------------------------------------------------------------------------------------------------------------------------------------------------------------------|-------------------------------------------------------------------------------------------------------------------------------------------------------------------------------------------------------|-----|-----|------------------------------------------------------------------------------------------------------------------------------------------------------------------|
| 85                             | Popliteal sciatic nerve block                                                | 90%    | 2%  | 8%  | Harmonize and revise to -<br>Sciatic nerve block at the<br>popliteal fossa | Injection around the sciatic nerve at or near the point of bifurcation in the<br>popliteal fossa                                                                                                                                          | 89%                                                                                                                                                                                                   | 1%  | 10% | Accept                                                                                                                                                           |
| 86                             | Selective tibial nerve block                                                 | 70%    | 8%  | 22% | Revise to - Tibial nerve block<br>at the popliteal fossa                   | Injection around the tibial nerve distal to the sciatic nerve bifurcation                                                                                                                                                                 | 88%                                                                                                                                                                                                   | 2%  | 10% | Accept                                                                                                                                                           |
| 87                             | Common peroneal nerve block                                                  | 90%    | 1%  | 9%  | Accept                                                                     | Injection at the common peroneal nerve distal to sciatic nerve bifurcation                                                                                                                                                                | 93%                                                                                                                                                                                                   | 1%  | 6%  | Accept                                                                                                                                                           |
| 88                             | Infiltration between the popliteal artery and capsule of the knee<br>(IPACK) | 86%    | 9%  | 5%  | Accept                                                                     | Injection in the soft tissues between the popliteal artery and the posterior<br>surface of the distal femur                                                                                                                               | 92%                                                                                                                                                                                                   | 2%  | 6%  | Accept                                                                                                                                                           |
| 89                             | Ankle block                                                                  | 86%    | 7%  | 7%  | Accept                                                                     | Injection of the 5 distal nerves that provide innervation of the foot at the<br>level of the ankle: Posterior tibial nerve, Deep Peroneal nerve, Superficial<br>Peroneal nerve, Saphenous and Sural nerves                                | 91%                                                                                                                                                                                                   | 2%  | 7%  | Accept                                                                                                                                                           |
| 90                             | Posterior tibial nerve block                                                 | 76%    | 5%  | 19% | Revise to 'Tibial nerve block<br>at the ankle                              | tendons of the tibiae anterior and flexor digitorum profundus are anterior<br>to the nerve and gastrocnemius-solius posterior to it. The posterior tibial<br>artery and the tendon of flexor hallucis longus lie deep to the nerve, often | 76%                                                                                                                                                                                                   | 8%  | 16% | Accept<br>medial malleolus, the tendons of the tibiae<br>anterior and flexor digitorum profundus are anterior<br>to the nerve and gastrocnemius-solius posterior |
| 91                             | Deep peroneal nerve block                                                    | 95%    | 3%  | 1%  | Accept                                                                     | Injection at the deep peroneal nerve above the intermalleolar line, medial<br>to the anterior tibial artery                                                                                                                               | 84%                                                                                                                                                                                                   | 7%  | 9%  | Accept                                                                                                                                                           |
| 92                             | Superficial peroneal nerve block                                             | 97%    | 2%  | 1%  | Accept                                                                     | peroneus brevis and the extensor digitorum longus as a triangular<br>hyperechoic shadow under the cural fascia. The extensor digitorum<br>longus is anterior to the nerve, while the peroneus brevis is posterior to                      | 88%                                                                                                                                                                                                   | 8%  | 7%  | Accept                                                                                                                                                           |
| 93                             | Sural nerve block                                                            | 92%    | 5%  | 3%  | Accept                                                                     | Injection of the sural nerve above the lateral malleolus, anterior to the<br>achilles tendon and posterior to the peroneus brevis                                                                                                         | 90%                                                                                                                                                                                                   | 6%  | 4%  | Accept                                                                                                                                                           |
| 94                             | Saphenous nerve block at the ankle                                           | 95%    | 5%  | 3%  | Accept                                                                     | Injection of the saphenous nerve proximal to the medial malleolus,<br>anterior to the great saphenous vein                                                                                                                                | 94%                                                                                                                                                                                                   | 3%  | 2%  | Accept                                                                                                                                                           |
| 95                             | Popliteal plexus block                                                       | 35%    | 32% | 33% | Exclude: very low<br>consensus to support                                  | Injection inside the distal end of the adductor canal close to the adductor<br>hiatus, adjacent to the femoral artery, between the medial vastus muscle<br>and the adductor magnus muscle                                                 | 48%                                                                                                                                                                                                   | 32% | 20% | Exclude: very low consensus to support                                                                                                                           |
| 96                             | Popliteal plexus block                                                       | 40%    | 31% | 30% | Exclude: very low<br>consensus to support                                  | Injection at the level of articular branch of tibial nerve                                                                                                                                                                                | 23%                                                                                                                                                                                                   | 31% | 46% | Exclude: very low consensus to support                                                                                                                           |
| 97                             | Superior medial genicular nerve block                                        | 79%    | 16% | 6%  | Accept                                                                     | Injection of the superior medial genicular nerve next to the genicular artery<br>on the medial side of the distal femur                                                                                                                   | 75%                                                                                                                                                                                                   | 21% | 4%  | Accept                                                                                                                                                           |
| 98                             | Superior lateral genicular nerve block                                       | 80%    | 15% | 6%  | Accept                                                                     | Injection of the superior lateral genicular nerve next to the genicular artery<br>on the lateral side of the distal femur                                                                                                                 | 75%                                                                                                                                                                                                   | 21% | 4%  | Accept                                                                                                                                                           |
| 99                             | Inferior medial genicular nerve block                                        | 81%    | 13% | 6%  | Accept                                                                     | Injection near the genicular artery at the junction of medial condyle of tibia<br>and distal shaft                                                                                                                                        | 73%                                                                                                                                                                                                   | 21% | 6%  | Accept                                                                                                                                                           |
| 100                            | Inferior lateral genicular nerve block                                       | 78%    | 17% | 6%  | Accept                                                                     | Injection near the genicular artery at the proximal tibia                                                                                                                                                                                 | 66%                                                                                                                                                                                                   | 27% | 8%  | Accept                                                                                                                                                           |
| 101                            | Middle genicular nerve block                                                 | 55%    | 31% | 14% | Exclude: very low<br>consensus to support                                  | Injection of the middle genicular nerve between the fascia of the vastus<br>intermedius, rectus femoris, suprapatellar bursae and vastus medialis<br>and lateralis                                                                        | 49%                                                                                                                                                                                                   | 43% | 8%  | Exclude: very low consensus to support                                                                                                                           |
| 102                            | Lateral retinacular nerve                                                    | 44%    | 38% | 17% | Exclude: very low<br>consensus to support                                  | Injection of the lateral retinacular nerve underneath the lateral collateral<br>ligament along with lateral inferior genicular artery                                                                                                     | 47%                                                                                                                                                                                                   | 41% | 13% | Exclude: very low consensus to support                                                                                                                           |
| 103                            | Nerve to vastus lateralis block                                              | 63%    | 29% | 8%  | Accept                                                                     | Injection around the vastus lateralis nerve, adjacent to the descending<br>branch of the lateral circumflex femoral artery in the mid thigh between the<br>vastus lateralis and the vastus intermedius                                    | 63%                                                                                                                                                                                                   | 32% | 5%  | Accept                                                                                                                                                           |
| Nerve to vastus medialis block |                                                                              | Accept |     |     |                                                                            | Proposed description: Injection around the nerve to vastus medialis where<br>it is located deep to the sartorius and lateral to the saphenous nerve and<br>femoral vessels in the femoral triangle                                        | Proposed description: Injection around the nerve<br>to vastus medialis where it is located deep to the<br>sartorius and lateral to the saphenous nerve and<br>femoral vessels in the femoral triangle |     |     |                                                                                                                                                                  |

[Back to contents](#) **Round 1 RSS&L TG**

[illegible]



|   |   |   |   |   |   |   |   |   |    |    |    |    |    |    |    |    |    |    |    |    |    |    |    |    |    |    |    |    |    |    |    |    |    |    |    |    |    |    |    |    |    |    |    |    |    |    |    |    |    |    |    |    |    |    |    |    |    |    |    |    |    |    |    |    |    |    |    |    |    |    |    |    |    |    |    |    |    |    |    |    |    |    |    |    |    |    |    |    |    |    |    |    |    |    |    |    |    |    |     |     |     |     |     |     |     |     |     |     |     |     |     |     |     |     |     |     |     |     |     |     |     |     |     |     |     |     |     |     |     |     |     |     |     |     |     |     |     |     |     |     |     |     |     |     |     |     |     |     |     |     |     |     |     |     |     |     |     |     |     |     |     |     |     |     |     |     |     |     |     |     |     |     |     |     |     |     |     |     |     |     |     |     |     |     |     |     |     |     |     |     |     |     |     |     |     |     |     |     |     |     |     |     |     |     |     |     |     |     |     |     |     |     |     |     |     |     |     |     |     |     |     |     |     |     |     |     |     |     |     |     |     |     |     |     |     |     |     |     |     |     |     |     |     |     |     |     |     |     |     |     |     |     |     |     |     |     |     |     |     |     |     |     |     |     |     |     |     |     |     |     |     |     |     |     |     |     |     |     |     |     |     |     |     |     |     |     |     |     |     |     |     |     |     |     |     |     |     |     |     |     |     |     |     |     |     |     |     |     |     |     |     |     |     |     |     |     |     |     |     |     |     |     |     |     |     |     |     |     |     |     |     |     |     |     |     |     |     |     |     |     |     |     |     |     |     |     |     |     |     |     |     |     |     |     |     |     |     |     |     |     |     |     |     |     |     |     |     |     |     |     |     |     |     |     |     |     |     |     |     |     |     |     |     |     |     |     |     |     |     |     |     |     |     |     |     |     |     |     |     |     |     |     |     |     |     |     |     |     |     |     |     |     |     |     |     |     |     |     |     |     |     |     |     |     |     |     |     |     |     |     |     |     |     |     |     |     |     |     |     |     |     |     |     |     |     |     |     |     |     |     |     |     |     |     |     |     |     |     |     |     |     |     |     |     |     |     |     |     |     |     |     |     |     |     |     |     |     |     |     |     |     |     |     |     |     |     |     |     |     |     |     |     |     |     |     |     |     |     |     |     |     |     |     |     |     |     |     |     |     |     |     |     |     |     |     |     |     |     |     |     |     |     |     |     |     |     |     |     |     |     |     |     |     |     |     |     |     |     |     |     |     |     |     |     |     |     |     |     |     |     |     |     |     |     |     |     |     |     |     |     |     |     |     |     |     |     |     |     |     |     |     |     |     |     |     |     |     |     |     |     |     |     |     |     |     |     |     |     |     |     |     |     |     |     |     |     |     |     |     |     |     |     |     |     |     |     |     |     |     |     |     |     |     |     |     |     |     |     |     |     |     |     |     |     |     |     |     |     |     |     |     |     |     |     |     |     |     |     |     |     |     |     |     |     |     |     |     |     |     |     |     |     |     |     |     |     |     |     |     |     |     |     |     |     |     |     |     |     |     |     |     |     |     |     |     |     |     |     |     |     |     |     |     |     |     |     |     |     |     |     |     |     |     |     |     |     |     |     |     |     |     |     |     |     |     |     |     |     |     |     |     |     |     |     |     |     |     |     |     |     |     |     |     |     |     |     |     |     |     |     |     |     |     |     |     |     |     |     |     |     |     |     |     |     |     |     |     |     |     |     |     |     |     |     |     |     |     |     |     |     |     |     |     |     |     |     |     |     |     |     |     |     |     |     |     |     |     |     |     |     |     |     |     |     |     |     |     |     |     |     |     |     |     |     |     |     |     |     |     |     |     |     |     |     |     |     |     |     |     |     |     |     |     |     |     |     |     |     |     |     |     |     |     |     |     |     |     |     |     |     |     |     |     |     |     |     |     |     |     |     |     |     |     |     |     |     |     |     |     |     |     |     |     |     |     |     |     |     |     |     |     |     |     |     |     |     |     |     |     |     |     |     |     |     |     |     |     |     |     |     |     |     |     |     |     |     |     |     |     |     |     |     |     |     |     |     |     |     |     |     |     |     |     |     |     |     |     |     |     |     |     |     |     |     |     |     |     |     |     |     |     |     |     |     |     |     |     |     |     |     |     |     |     |     |     |     |     |     |     |     |     |     |     |     |     |     |     |     |     |     |     |     |     |     |     |     |     |     |     |     |     |     |     |     |     |     |     |     |     |     |     |     |     |     |     |     |     |     |     |     |     |     |     |     |     |     |     |     |     |     |     |     |     |     |     |     |     |     |      |      |      |      |      |      |      |      |      |      |      |      |      |      |      |      |      |      |      |      |      |      |      |      |      |      |      |      |      |      |      |      |      |      |      |      |      |      |      |      |      |      |      |      |      |      |      |      |      |      |      |      |      |      |      |      |      |      |      |      |      |      |      |      |      |      |      |      |      |      |      |      |      |      |      |      |      |      |      |      |      |      |      |      |      |      |      |      |      |      |      |      |      |      |      |      |      |      |      |      |      |      |      |      |      |      |      |      |      |      |      |      |      |      |      |      |      |      |      |      |      |      |      |      |      |      |      |      |      |      |      |      |      |      |      |      |      |      |      |      |      |      |      |      |      |      |      |      |      |      |      |      |      |      |      |      |      |      |      |      |      |      |      |      |      |      |      |      |      |      |      |      |      |      |      |      |      |      |      |      |      |      |      |      |      |      |      |      |      |      |      |      |      |      |      |      |      |      |      |      |      |      |      |      |      |      |      |      |      |      |      |      |      |      |      |      |      |      |      |      |      |      |      |      |      |      |      |      |      |      |      |      |      |      |      |      |      |      |      |      |      |      |      |      |      |      |      |      |      |      |      |      |      |      |      |      |      |      |      |      |      |      |      |      |      |      |      |      |      |      |      |      |      |      |      |      |      |      |      |      |      |      |      |      |      |      |      |      |      |      |      |      |      |      |      |      |      |      |      |      |      |      |      |      |      |      |      |      |      |      |      |      |      |      |      |      |      |      |      |      |      |      |      |      |      |      |      |      |      |      |      |      |      |      |      |      |      |      |      |      |      |      |      |      |      |      |      |      |      |      |      |      |      |      |      |      |      |      |      |      |      |      |      |      |      |      |      |      |      |      |      |      |      |      |      |      |      |      |      |      |      |      |      |      |      |      |      |      |      |      |      |      |      |      |      |      |      |      |      |      |      |      |      |      |      |      |      |      |      |      |      |      |      |      |      |      |      |      |      |      |      |      |      |      |      |      |      |      |      |      |      |      |      |      |      |      |      |      |      |      |      |      |      |      |      |      |      |      |      |      |      |      |      |      |      |      |      |      |      |      |      |      |      |      |      |      |      |      |      |      |      |      |      |      |      |      |      |      |      |      |      |      |      |      |      |      |      |    |
|---|---|---|---|---|---|---|---|---|----|----|----|----|----|----|----|----|----|----|----|----|----|----|----|----|----|----|----|----|----|----|----|----|----|----|----|----|----|----|----|----|----|----|----|----|----|----|----|----|----|----|----|----|----|----|----|----|----|----|----|----|----|----|----|----|----|----|----|----|----|----|----|----|----|----|----|----|----|----|----|----|----|----|----|----|----|----|----|----|----|----|----|----|----|----|----|----|----|----|-----|-----|-----|-----|-----|-----|-----|-----|-----|-----|-----|-----|-----|-----|-----|-----|-----|-----|-----|-----|-----|-----|-----|-----|-----|-----|-----|-----|-----|-----|-----|-----|-----|-----|-----|-----|-----|-----|-----|-----|-----|-----|-----|-----|-----|-----|-----|-----|-----|-----|-----|-----|-----|-----|-----|-----|-----|-----|-----|-----|-----|-----|-----|-----|-----|-----|-----|-----|-----|-----|-----|-----|-----|-----|-----|-----|-----|-----|-----|-----|-----|-----|-----|-----|-----|-----|-----|-----|-----|-----|-----|-----|-----|-----|-----|-----|-----|-----|-----|-----|-----|-----|-----|-----|-----|-----|-----|-----|-----|-----|-----|-----|-----|-----|-----|-----|-----|-----|-----|-----|-----|-----|-----|-----|-----|-----|-----|-----|-----|-----|-----|-----|-----|-----|-----|-----|-----|-----|-----|-----|-----|-----|-----|-----|-----|-----|-----|-----|-----|-----|-----|-----|-----|-----|-----|-----|-----|-----|-----|-----|-----|-----|-----|-----|-----|-----|-----|-----|-----|-----|-----|-----|-----|-----|-----|-----|-----|-----|-----|-----|-----|-----|-----|-----|-----|-----|-----|-----|-----|-----|-----|-----|-----|-----|-----|-----|-----|-----|-----|-----|-----|-----|-----|-----|-----|-----|-----|-----|-----|-----|-----|-----|-----|-----|-----|-----|-----|-----|-----|-----|-----|-----|-----|-----|-----|-----|-----|-----|-----|-----|-----|-----|-----|-----|-----|-----|-----|-----|-----|-----|-----|-----|-----|-----|-----|-----|-----|-----|-----|-----|-----|-----|-----|-----|-----|-----|-----|-----|-----|-----|-----|-----|-----|-----|-----|-----|-----|-----|-----|-----|-----|-----|-----|-----|-----|-----|-----|-----|-----|-----|-----|-----|-----|-----|-----|-----|-----|-----|-----|-----|-----|-----|-----|-----|-----|-----|-----|-----|-----|-----|-----|-----|-----|-----|-----|-----|-----|-----|-----|-----|-----|-----|-----|-----|-----|-----|-----|-----|-----|-----|-----|-----|-----|-----|-----|-----|-----|-----|-----|-----|-----|-----|-----|-----|-----|-----|-----|-----|-----|-----|-----|-----|-----|-----|-----|-----|-----|-----|-----|-----|-----|-----|-----|-----|-----|-----|-----|-----|-----|-----|-----|-----|-----|-----|-----|-----|-----|-----|-----|-----|-----|-----|-----|-----|-----|-----|-----|-----|-----|-----|-----|-----|-----|-----|-----|-----|-----|-----|-----|-----|-----|-----|-----|-----|-----|-----|-----|-----|-----|-----|-----|-----|-----|-----|-----|-----|-----|-----|-----|-----|-----|-----|-----|-----|-----|-----|-----|-----|-----|-----|-----|-----|-----|-----|-----|-----|-----|-----|-----|-----|-----|-----|-----|-----|-----|-----|-----|-----|-----|-----|-----|-----|-----|-----|-----|-----|-----|-----|-----|-----|-----|-----|-----|-----|-----|-----|-----|-----|-----|-----|-----|-----|-----|-----|-----|-----|-----|-----|-----|-----|-----|-----|-----|-----|-----|-----|-----|-----|-----|-----|-----|-----|-----|-----|-----|-----|-----|-----|-----|-----|-----|-----|-----|-----|-----|-----|-----|-----|-----|-----|-----|-----|-----|-----|-----|-----|-----|-----|-----|-----|-----|-----|-----|-----|-----|-----|-----|-----|-----|-----|-----|-----|-----|-----|-----|-----|-----|-----|-----|-----|-----|-----|-----|-----|-----|-----|-----|-----|-----|-----|-----|-----|-----|-----|-----|-----|-----|-----|-----|-----|-----|-----|-----|-----|-----|-----|-----|-----|-----|-----|-----|-----|-----|-----|-----|-----|-----|-----|-----|-----|-----|-----|-----|-----|-----|-----|-----|-----|-----|-----|-----|-----|-----|-----|-----|-----|-----|-----|-----|-----|-----|-----|-----|-----|-----|-----|-----|-----|-----|-----|-----|-----|-----|-----|-----|-----|-----|-----|-----|-----|-----|-----|-----|-----|-----|-----|-----|-----|-----|-----|-----|-----|-----|-----|-----|-----|-----|-----|-----|-----|-----|-----|-----|-----|-----|-----|-----|-----|-----|-----|-----|-----|-----|-----|-----|-----|-----|-----|-----|-----|-----|-----|-----|-----|-----|-----|-----|-----|-----|-----|-----|-----|-----|-----|-----|-----|-----|-----|-----|-----|-----|-----|-----|-----|-----|-----|-----|-----|-----|-----|-----|-----|-----|-----|-----|-----|-----|-----|-----|-----|-----|-----|-----|-----|-----|-----|-----|-----|-----|-----|-----|-----|-----|-----|-----|-----|-----|-----|-----|-----|-----|-----|-----|-----|-----|-----|-----|-----|-----|-----|-----|-----|-----|-----|-----|-----|-----|-----|-----|-----|-----|-----|-----|-----|-----|-----|-----|-----|-----|-----|-----|-----|-----|-----|-----|-----|-----|-----|-----|-----|-----|-----|-----|-----|-----|-----|-----|-----|-----|-----|-----|-----|-----|-----|-----|-----|-----|-----|-----|-----|-----|-----|-----|-----|-----|-----|-----|-----|-----|-----|-----|-----|-----|-----|-----|-----|-----|-----|-----|-----|-----|-----|-----|-----|-----|-----|-----|-----|-----|-----|-----|-----|-----|-----|-----|-----|-----|-----|-----|-----|-----|-----|-----|-----|-----|-----|-----|-----|-----|-----|-----|-----|-----|-----|-----|-----|-----|-----|-----|-----|-----|-----|-----|-----|-----|-----|-----|-----|-----|-----|-----|-----|-----|-----|-----|-----|-----|-----|-----|-----|-----|-----|-----|-----|-----|-----|-----|-----|-----|-----|-----|-----|-----|-----|-----|-----|-----|-----|-----|-----|-----|-----|-----|-----|-----|-----|-----|-----|-----|-----|-----|-----|-----|-----|-----|-----|-----|-----|-----|-----|-----|-----|-----|-----|-----|-----|-----|-----|-----|-----|------|------|------|------|------|------|------|------|------|------|------|------|------|------|------|------|------|------|------|------|------|------|------|------|------|------|------|------|------|------|------|------|------|------|------|------|------|------|------|------|------|------|------|------|------|------|------|------|------|------|------|------|------|------|------|------|------|------|------|------|------|------|------|------|------|------|------|------|------|------|------|------|------|------|------|------|------|------|------|------|------|------|------|------|------|------|------|------|------|------|------|------|------|------|------|------|------|------|------|------|------|------|------|------|------|------|------|------|------|------|------|------|------|------|------|------|------|------|------|------|------|------|------|------|------|------|------|------|------|------|------|------|------|------|------|------|------|------|------|------|------|------|------|------|------|------|------|------|------|------|------|------|------|------|------|------|------|------|------|------|------|------|------|------|------|------|------|------|------|------|------|------|------|------|------|------|------|------|------|------|------|------|------|------|------|------|------|------|------|------|------|------|------|------|------|------|------|------|------|------|------|------|------|------|------|------|------|------|------|------|------|------|------|------|------|------|------|------|------|------|------|------|------|------|------|------|------|------|------|------|------|------|------|------|------|------|------|------|------|------|------|------|------|------|------|------|------|------|------|------|------|------|------|------|------|------|------|------|------|------|------|------|------|------|------|------|------|------|------|------|------|------|------|------|------|------|------|------|------|------|------|------|------|------|------|------|------|------|------|------|------|------|------|------|------|------|------|------|------|------|------|------|------|------|------|------|------|------|------|------|------|------|------|------|------|------|------|------|------|------|------|------|------|------|------|------|------|------|------|------|------|------|------|------|------|------|------|------|------|------|------|------|------|------|------|------|------|------|------|------|------|------|------|------|------|------|------|------|------|------|------|------|------|------|------|------|------|------|------|------|------|------|------|------|------|------|------|------|------|------|------|------|------|------|------|------|------|------|------|------|------|------|------|------|------|------|------|------|------|------|------|------|------|------|------|------|------|------|------|------|------|------|------|------|------|------|------|------|------|------|------|------|------|------|------|------|------|------|------|------|------|------|------|------|------|------|------|------|------|------|------|------|------|------|------|------|------|------|------|------|------|------|------|------|------|------|------|------|------|------|------|------|------|------|------|------|------|------|------|------|------|------|------|------|------|------|------|------|------|------|------|------|------|------|------|------|------|----|
| 1 | 2 | 3 | 4 | 5 | 6 | 7 | 8 | 9 | 10 | 11 | 12 | 13 | 14 | 15 | 16 | 17 | 18 | 19 | 20 | 21 | 22 | 23 | 24 | 25 | 26 | 27 | 28 | 29 | 30 | 31 | 32 | 33 | 34 | 35 | 36 | 37 | 38 | 39 | 40 | 41 | 42 | 43 | 44 | 45 | 46 | 47 | 48 | 49 | 50 | 51 | 52 | 53 | 54 | 55 | 56 | 57 | 58 | 59 | 60 | 61 | 62 | 63 | 64 | 65 | 66 | 67 | 68 | 69 | 70 | 71 | 72 | 73 | 74 | 75 | 76 | 77 | 78 | 79 | 80 | 81 | 82 | 83 | 84 | 85 | 86 | 87 | 88 | 89 | 90 | 91 | 92 | 93 | 94 | 95 | 96 | 97 | 98 | 99 | 100 | 101 | 102 | 103 | 104 | 105 | 106 | 107 | 108 | 109 | 110 | 111 | 112 | 113 | 114 | 115 | 116 | 117 | 118 | 119 | 120 | 121 | 122 | 123 | 124 | 125 | 126 | 127 | 128 | 129 | 130 | 131 | 132 | 133 | 134 | 135 | 136 | 137 | 138 | 139 | 140 | 141 | 142 | 143 | 144 | 145 | 146 | 147 | 148 | 149 | 150 | 151 | 152 | 153 | 154 | 155 | 156 | 157 | 158 | 159 | 160 | 161 | 162 | 163 | 164 | 165 | 166 | 167 | 168 | 169 | 170 | 171 | 172 | 173 | 174 | 175 | 176 | 177 | 178 | 179 | 180 | 181 | 182 | 183 | 184 | 185 | 186 | 187 | 188 | 189 | 190 | 191 | 192 | 193 | 194 | 195 | 196 | 197 | 198 | 199 | 200 | 201 | 202 | 203 | 204 | 205 | 206 | 207 | 208 | 209 | 210 | 211 | 212 | 213 | 214 | 215 | 216 | 217 | 218 | 219 | 220 | 221 | 222 | 223 | 224 | 225 | 226 | 227 | 228 | 229 | 230 | 231 | 232 | 233 | 234 | 235 | 236 | 237 | 238 | 239 | 240 | 241 | 242 | 243 | 244 | 245 | 246 | 247 | 248 | 249 | 250 | 251 | 252 | 253 | 254 | 255 | 256 | 257 | 258 | 259 | 260 | 261 | 262 | 263 | 264 | 265 | 266 | 267 | 268 | 269 | 270 | 271 | 272 | 273 | 274 | 275 | 276 | 277 | 278 | 279 | 280 | 281 | 282 | 283 | 284 | 285 | 286 | 287 | 288 | 289 | 290 | 291 | 292 | 293 | 294 | 295 | 296 | 297 | 298 | 299 | 300 | 301 | 302 | 303 | 304 | 305 | 306 | 307 | 308 | 309 | 310 | 311 | 312 | 313 | 314 | 315 | 316 | 317 | 318 | 319 | 320 | 321 | 322 | 323 | 324 | 325 | 326 | 327 | 328 | 329 | 330 | 331 | 332 | 333 | 334 | 335 | 336 | 337 | 338 | 339 | 340 | 341 | 342 | 343 | 344 | 345 | 346 | 347 | 348 | 349 | 350 | 351 | 352 | 353 | 354 | 355 | 356 | 357 | 358 | 359 | 360 | 361 | 362 | 363 | 364 | 365 | 366 | 367 | 368 | 369 | 370 | 371 | 372 | 373 | 374 | 375 | 376 | 377 | 378 | 379 | 380 | 381 | 382 | 383 | 384 | 385 | 386 | 387 | 388 | 389 | 390 | 391 | 392 | 393 | 394 | 395 | 396 | 397 | 398 | 399 | 400 | 401 | 402 | 403 | 404 | 405 | 406 | 407 | 408 | 409 | 410 | 411 | 412 | 413 | 414 | 415 | 416 | 417 | 418 | 419 | 420 | 421 | 422 | 423 | 424 | 425 | 426 | 427 | 428 | 429 | 430 | 431 | 432 | 433 | 434 | 435 | 436 | 437 | 438 | 439 | 440 | 441 | 442 | 443 | 444 | 445 | 446 | 447 | 448 | 449 | 450 | 451 | 452 | 453 | 454 | 455 | 456 | 457 | 458 | 459 | 460 | 461 | 462 | 463 | 464 | 465 | 466 | 467 | 468 | 469 | 470 | 471 | 472 | 473 | 474 | 475 | 476 | 477 | 478 | 479 | 480 | 481 | 482 | 483 | 484 | 485 | 486 | 487 | 488 | 489 | 490 | 491 | 492 | 493 | 494 | 495 | 496 | 497 | 498 | 499 | 500 | 501 | 502 | 503 | 504 | 505 | 506 | 507 | 508 | 509 | 510 | 511 | 512 | 513 | 514 | 515 | 516 | 517 | 518 | 519 | 520 | 521 | 522 | 523 | 524 | 525 | 526 | 527 | 528 | 529 | 530 | 531 | 532 | 533 | 534 | 535 | 536 | 537 | 538 | 539 | 540 | 541 | 542 | 543 | 544 | 545 | 546 | 547 | 548 | 549 | 550 | 551 | 552 | 553 | 554 | 555 | 556 | 557 | 558 | 559 | 560 | 561 | 562 | 563 | 564 | 565 | 566 | 567 | 568 | 569 | 570 | 571 | 572 | 573 | 574 | 575 | 576 | 577 | 578 | 579 | 580 | 581 | 582 | 583 | 584 | 585 | 586 | 587 | 588 | 589 | 590 | 591 | 592 | 593 | 594 | 595 | 596 | 597 | 598 | 599 | 600 | 601 | 602 | 603 | 604 | 605 | 606 | 607 | 608 | 609 | 610 | 611 | 612 | 613 | 614 | 615 | 616 | 617 | 618 | 619 | 620 | 621 | 622 | 623 | 624 | 625 | 626 | 627 | 628 | 629 | 630 | 631 | 632 | 633 | 634 | 635 | 636 | 637 | 638 | 639 | 640 | 641 | 642 | 643 | 644 | 645 | 646 | 647 | 648 | 649 | 650 | 651 | 652 | 653 | 654 | 655 | 656 | 657 | 658 | 659 | 660 | 661 | 662 | 663 | 664 | 665 | 666 | 667 | 668 | 669 | 670 | 671 | 672 | 673 | 674 | 675 | 676 | 677 | 678 | 679 | 680 | 681 | 682 | 683 | 684 | 685 | 686 | 687 | 688 | 689 | 690 | 691 | 692 | 693 | 694 | 695 | 696 | 697 | 698 | 699 | 700 | 701 | 702 | 703 | 704 | 705 | 706 | 707 | 708 | 709 | 710 | 711 | 712 | 713 | 714 | 715 | 716 | 717 | 718 | 719 | 720 | 721 | 722 | 723 | 724 | 725 | 726 | 727 | 728 | 729 | 730 | 731 | 732 | 733 | 734 | 735 | 736 | 737 | 738 | 739 | 740 | 741 | 742 | 743 | 744 | 745 | 746 | 747 | 748 | 749 | 750 | 751 | 752 | 753 | 754 | 755 | 756 | 757 | 758 | 759 | 760 | 761 | 762 | 763 | 764 | 765 | 766 | 767 | 768 | 769 | 770 | 771 | 772 | 773 | 774 | 775 | 776 | 777 | 778 | 779 | 780 | 781 | 782 | 783 | 784 | 785 | 786 | 787 | 788 | 789 | 790 | 791 | 792 | 793 | 794 | 795 | 796 | 797 | 798 | 799 | 800 | 801 | 802 | 803 | 804 | 805 | 806 | 807 | 808 | 809 | 810 | 811 | 812 | 813 | 814 | 815 | 816 | 817 | 818 | 819 | 820 | 821 | 822 | 823 | 824 | 825 | 826 | 827 | 828 | 829 | 830 | 831 | 832 | 833 | 834 | 835 | 836 | 837 | 838 | 839 | 840 | 841 | 842 | 843 | 844 | 845 | 846 | 847 | 848 | 849 | 850 | 851 | 852 | 853 | 854 | 855 | 856 | 857 | 858 | 859 | 860 | 861 | 862 | 863 | 864 | 865 | 866 | 867 | 868 | 869 | 870 | 871 | 872 | 873 | 874 | 875 | 876 | 877 | 878 | 879 | 880 | 881 | 882 | 883 | 884 | 885 | 886 | 887 | 888 | 889 | 890 | 891 | 892 | 893 | 894 | 895 | 896 | 897 | 898 | 899 | 900 | 901 | 902 | 903 | 904 | 905 | 906 | 907 | 908 | 909 | 910 | 911 | 912 | 913 | 914 | 915 | 916 | 917 | 918 | 919 | 920 | 921 | 922 | 923 | 924 | 925 | 926 | 927 | 928 | 929 | 930 | 931 | 932 | 933 | 934 | 935 | 936 | 937 | 938 | 939 | 940 | 941 | 942 | 943 | 944 | 945 | 946 | 947 | 948 | 949 | 950 | 951 | 952 | 953 | 954 | 955 | 956 | 957 | 958 | 959 | 960 | 961 | 962 | 963 | 964 | 965 | 966 | 967 | 968 | 969 | 970 | 971 | 972 | 973 | 974 | 975 | 976 | 977 | 978 | 979 | 980 | 981 | 982 | 983 | 984 | 985 | 986 | 987 | 988 | 989 | 990 | 991 | 992 | 993 | 994 | 995 | 996 | 997 | 998 | 999 | 1000 | 1001 | 1002 | 1003 | 1004 | 1005 | 1006 | 1007 | 1008 | 1009 | 1010 | 1011 | 1012 | 1013 | 1014 | 1015 | 1016 | 1017 | 1018 | 1019 | 1020 | 1021 | 1022 | 1023 | 1024 | 1025 | 1026 | 1027 | 1028 | 1029 | 1030 | 1031 | 1032 | 1033 | 1034 | 1035 | 1036 | 1037 | 1038 | 1039 | 1040 | 1041 | 1042 | 1043 | 1044 | 1045 | 1046 | 1047 | 1048 | 1049 | 1050 | 1051 | 1052 | 1053 | 1054 | 1055 | 1056 | 1057 | 1058 | 1059 | 1060 | 1061 | 1062 | 1063 | 1064 | 1065 | 1066 | 1067 | 1068 | 1069 | 1070 | 1071 | 1072 | 1073 | 1074 | 1075 | 1076 | 1077 | 1078 | 1079 | 1080 | 1081 | 1082 | 1083 | 1084 | 1085 | 1086 | 1087 | 1088 | 1089 | 1090 | 1091 | 1092 | 1093 | 1094 | 1095 | 1096 | 1097 | 1098 | 1099 | 1100 | 1101 | 1102 | 1103 | 1104 | 1105 | 1106 | 1107 | 1108 | 1109 | 1110 | 1111 | 1112 | 1113 | 1114 | 1115 | 1116 | 1117 | 1118 | 1119 | 1120 | 1121 | 1122 | 1123 | 1124 | 1125 | 1126 | 1127 | 1128 | 1129 | 1130 | 1131 | 1132 | 1133 | 1134 | 1135 | 1136 | 1137 | 1138 | 1139 | 1140 | 1141 | 1142 | 1143 | 1144 | 1145 | 1146 | 1147 | 1148 | 1149 | 1150 | 1151 | 1152 | 1153 | 1154 | 1155 | 1156 | 1157 | 1158 | 1159 | 1160 | 1161 | 1162 | 1163 | 1164 | 1165 | 1166 | 1167 | 1168 | 1169 | 1170 | 1171 | 1172 | 1173 | 1174 | 1175 | 1176 | 1177 | 1178 | 1179 | 1180 | 1181 | 1182 | 1183 | 1184 | 1185 | 1186 | 1187 | 1188 | 1189 | 1190 | 1191 | 1192 | 1193 | 1194 | 1195 | 1196 | 1197 | 1198 | 1199 | 1200 | 1201 | 1202 | 1203 | 1204 | 1205 | 1206 | 1207 | 1208 | 1209 | 1210 | 1211 | 1212 | 1213 | 1214 | 1215 | 1216 | 1217 | 1218 | 1219 | 1220 | 1221 | 1222 | 1223 | 1224 | 1225 | 1226 | 1227 | 1228 | 1229 | 1230 | 1231 | 1232 | 1233 | 1234 | 1235 | 1236 | 1237 | 1238 | 1239 | 1240 | 1241 | 1242 | 1243 | 1244 | 1245 | 1246 | 1247 | 1248 | 1249 | 1250 | 1251 | 1252 | 1253 | 1254 | 1255 | 1256 | 1257 | 1258 | 1259 | 1260 | 1261 | 1262 | 1263 | 1264 | 1265 | 1266 | 1267 | 1268 | 1269 | 1270 | 1271 | 1272 | 1273 | 1274 | 1275 | 1276 | 1277 | 1278 | 1279 | 1280 | 1281 | 1282 | 1283 | 1284 | 1285 | 1286 | 1287 | 1288 | 1289 | 1290 | 1291 | 1292 | 1293 | 1294 | 1295 | 1296 | 1297 | 1298 | 1299 | 1300 | 1301 | 1302 | 1303 | 1304 | 1305 | 1306 | 1307 | 1308 | 1309 | 1310 | 1311 | 1312 | 1313 | 1314 | 1315 | 1316 | 1317 | 1318 | 1319 | 1320 | 1321 | 1322 | 1323 | 1324 | 1325 | 1326 | 1327 | 1328 | 1329 | 1330 | 1331 | 1332 | 1333 | 1334 | 1335 | 1336 | 1337 | 1338 | 1339 | 1340 | 1341 | 1342 | 1343 | 1344 | 1345 | 1346 | 1347 | 1348 | 1349 | 1350 | 1351 | 1352 | 1353 | 1354 | 1355 | 1356 | 1357 | 1358 | 1359 | 1360 | 1361 | 1362 | 1363 | 1364 | 1365 | 1366 | 1367 | 1368 | 1369 | 1370 | 1371 | 1372 | 1373 | 1374 | 1375 | 1376 | 1377 | 1378 | 1379 | 1380 | 1381 | 1382 | 1383 | 1384 | 1385 | 1386 | 1387 | 1388 | 1389 | 1390 | 1391 | 1392 | 1393 | 1394 | 1395 | 1396 | 1397 | 1398 | 1399 | 1400 | 1401 | 1402 | 1403 | 1404 | 1405 | 1406 | 1407 | 1408 | 1409 | 1410 | 1411 | 1412 | 1413 | 1414 | 1415 | 1416 | 1417 | 1418 | 1419 | 1420 | 1421 | 1422 | 1423 | 1424 | 1425 | 1426 | 1427 | 1428 | 1429 | 1430 | 1431 | 1432 | 1433 | 1434 | 1435 | 1436 | 1437 | 1438 | 1439 | 1440 | 1441 | 1442 | 1443 | 1444 | 1445 | 1446 | 1447 | 1448 | 1449 | 1450 | 1451 | 1452 | 1453 | 1454 | 1455 | 1456 | 1457 | 1458 | 1459 | 1460 | 1461 | 1462 | 1463 | 1464 | 1465 | 1466 | 1467 | 1468 | 1469 | 1470 | 1471 | 1472 | 1473 | 1474 | 1475 | 1476 | 1477 | 1478 | 1479 | 1480 | 1481 | 1482 | 1483 | 1484 | 1485 | 1486 | 14 |
|---|---|---|---|---|---|---|---|---|----|----|----|----|----|----|----|----|----|----|----|----|----|----|----|----|----|----|----|----|----|----|----|----|----|----|----|----|----|----|----|----|----|----|----|----|----|----|----|----|----|----|----|----|----|----|----|----|----|----|----|----|----|----|----|----|----|----|----|----|----|----|----|----|----|----|----|----|----|----|----|----|----|----|----|----|----|----|----|----|----|----|----|----|----|----|----|----|----|----|-----|-----|-----|-----|-----|-----|-----|-----|-----|-----|-----|-----|-----|-----|-----|-----|-----|-----|-----|-----|-----|-----|-----|-----|-----|-----|-----|-----|-----|-----|-----|-----|-----|-----|-----|-----|-----|-----|-----|-----|-----|-----|-----|-----|-----|-----|-----|-----|-----|-----|-----|-----|-----|-----|-----|-----|-----|-----|-----|-----|-----|-----|-----|-----|-----|-----|-----|-----|-----|-----|-----|-----|-----|-----|-----|-----|-----|-----|-----|-----|-----|-----|-----|-----|-----|-----|-----|-----|-----|-----|-----|-----|-----|-----|-----|-----|-----|-----|-----|-----|-----|-----|-----|-----|-----|-----|-----|-----|-----|-----|-----|-----|-----|-----|-----|-----|-----|-----|-----|-----|-----|-----|-----|-----|-----|-----|-----|-----|-----|-----|-----|-----|-----|-----|-----|-----|-----|-----|-----|-----|-----|-----|-----|-----|-----|-----|-----|-----|-----|-----|-----|-----|-----|-----|-----|-----|-----|-----|-----|-----|-----|-----|-----|-----|-----|-----|-----|-----|-----|-----|-----|-----|-----|-----|-----|-----|-----|-----|-----|-----|-----|-----|-----|-----|-----|-----|-----|-----|-----|-----|-----|-----|-----|-----|-----|-----|-----|-----|-----|-----|-----|-----|-----|-----|-----|-----|-----|-----|-----|-----|-----|-----|-----|-----|-----|-----|-----|-----|-----|-----|-----|-----|-----|-----|-----|-----|-----|-----|-----|-----|-----|-----|-----|-----|-----|-----|-----|-----|-----|-----|-----|-----|-----|-----|-----|-----|-----|-----|-----|-----|-----|-----|-----|-----|-----|-----|-----|-----|-----|-----|-----|-----|-----|-----|-----|-----|-----|-----|-----|-----|-----|-----|-----|-----|-----|-----|-----|-----|-----|-----|-----|-----|-----|-----|-----|-----|-----|-----|-----|-----|-----|-----|-----|-----|-----|-----|-----|-----|-----|-----|-----|-----|-----|-----|-----|-----|-----|-----|-----|-----|-----|-----|-----|-----|-----|-----|-----|-----|-----|-----|-----|-----|-----|-----|-----|-----|-----|-----|-----|-----|-----|-----|-----|-----|-----|-----|-----|-----|-----|-----|-----|-----|-----|-----|-----|-----|-----|-----|-----|-----|-----|-----|-----|-----|-----|-----|-----|-----|-----|-----|-----|-----|-----|-----|-----|-----|-----|-----|-----|-----|-----|-----|-----|-----|-----|-----|-----|-----|-----|-----|-----|-----|-----|-----|-----|-----|-----|-----|-----|-----|-----|-----|-----|-----|-----|-----|-----|-----|-----|-----|-----|-----|-----|-----|-----|-----|-----|-----|-----|-----|-----|-----|-----|-----|-----|-----|-----|-----|-----|-----|-----|-----|-----|-----|-----|-----|-----|-----|-----|-----|-----|-----|-----|-----|-----|-----|-----|-----|-----|-----|-----|-----|-----|-----|-----|-----|-----|-----|-----|-----|-----|-----|-----|-----|-----|-----|-----|-----|-----|-----|-----|-----|-----|-----|-----|-----|-----|-----|-----|-----|-----|-----|-----|-----|-----|-----|-----|-----|-----|-----|-----|-----|-----|-----|-----|-----|-----|-----|-----|-----|-----|-----|-----|-----|-----|-----|-----|-----|-----|-----|-----|-----|-----|-----|-----|-----|-----|-----|-----|-----|-----|-----|-----|-----|-----|-----|-----|-----|-----|-----|-----|-----|-----|-----|-----|-----|-----|-----|-----|-----|-----|-----|-----|-----|-----|-----|-----|-----|-----|-----|-----|-----|-----|-----|-----|-----|-----|-----|-----|-----|-----|-----|-----|-----|-----|-----|-----|-----|-----|-----|-----|-----|-----|-----|-----|-----|-----|-----|-----|-----|-----|-----|-----|-----|-----|-----|-----|-----|-----|-----|-----|-----|-----|-----|-----|-----|-----|-----|-----|-----|-----|-----|-----|-----|-----|-----|-----|-----|-----|-----|-----|-----|-----|-----|-----|-----|-----|-----|-----|-----|-----|-----|-----|-----|-----|-----|-----|-----|-----|-----|-----|-----|-----|-----|-----|-----|-----|-----|-----|-----|-----|-----|-----|-----|-----|-----|-----|-----|-----|-----|-----|-----|-----|-----|-----|-----|-----|-----|-----|-----|-----|-----|-----|-----|-----|-----|-----|-----|-----|-----|-----|-----|-----|-----|-----|-----|-----|-----|-----|-----|-----|-----|-----|-----|-----|-----|-----|-----|-----|-----|-----|-----|-----|-----|-----|-----|-----|-----|-----|-----|-----|-----|-----|-----|-----|-----|-----|-----|-----|-----|-----|-----|-----|-----|-----|-----|-----|-----|-----|-----|-----|-----|-----|-----|-----|-----|-----|-----|-----|-----|-----|-----|-----|-----|-----|-----|-----|-----|-----|-----|-----|-----|-----|-----|-----|-----|-----|-----|-----|-----|-----|-----|-----|-----|-----|-----|-----|-----|-----|-----|-----|-----|-----|-----|-----|-----|-----|-----|-----|-----|-----|-----|-----|-----|-----|-----|-----|-----|-----|-----|-----|-----|-----|-----|-----|-----|-----|-----|-----|-----|-----|-----|-----|-----|-----|-----|-----|-----|-----|-----|-----|-----|-----|-----|-----|-----|-----|-----|-----|-----|-----|-----|-----|-----|-----|-----|-----|-----|-----|-----|-----|-----|-----|-----|-----|-----|-----|-----|-----|-----|-----|-----|-----|-----|-----|-----|-----|-----|-----|-----|-----|-----|-----|-----|-----|-----|-----|-----|-----|-----|-----|-----|-----|-----|-----|-----|-----|-----|-----|-----|-----|-----|-----|-----|-----|-----|-----|-----|-----|-----|-----|-----|-----|-----|-----|-----|-----|-----|-----|-----|-----|-----|-----|-----|-----|-----|-----|-----|-----|-----|-----|-----|-----|-----|-----|-----|-----|-----|-----|-----|-----|-----|-----|-----|-----|-----|-----|-----|-----|-----|------|------|------|------|------|------|------|------|------|------|------|------|------|------|------|------|------|------|------|------|------|------|------|------|------|------|------|------|------|------|------|------|------|------|------|------|------|------|------|------|------|------|------|------|------|------|------|------|------|------|------|------|------|------|------|------|------|------|------|------|------|------|------|------|------|------|------|------|------|------|------|------|------|------|------|------|------|------|------|------|------|------|------|------|------|------|------|------|------|------|------|------|------|------|------|------|------|------|------|------|------|------|------|------|------|------|------|------|------|------|------|------|------|------|------|------|------|------|------|------|------|------|------|------|------|------|------|------|------|------|------|------|------|------|------|------|------|------|------|------|------|------|------|------|------|------|------|------|------|------|------|------|------|------|------|------|------|------|------|------|------|------|------|------|------|------|------|------|------|------|------|------|------|------|------|------|------|------|------|------|------|------|------|------|------|------|------|------|------|------|------|------|------|------|------|------|------|------|------|------|------|------|------|------|------|------|------|------|------|------|------|------|------|------|------|------|------|------|------|------|------|------|------|------|------|------|------|------|------|------|------|------|------|------|------|------|------|------|------|------|------|------|------|------|------|------|------|------|------|------|------|------|------|------|------|------|------|------|------|------|------|------|------|------|------|------|------|------|------|------|------|------|------|------|------|------|------|------|------|------|------|------|------|------|------|------|------|------|------|------|------|------|------|------|------|------|------|------|------|------|------|------|------|------|------|------|------|------|------|------|------|------|------|------|------|------|------|------|------|------|------|------|------|------|------|------|------|------|------|------|------|------|------|------|------|------|------|------|------|------|------|------|------|------|------|------|------|------|------|------|------|------|------|------|------|------|------|------|------|------|------|------|------|------|------|------|------|------|------|------|------|------|------|------|------|------|------|------|------|------|------|------|------|------|------|------|------|------|------|------|------|------|------|------|------|------|------|------|------|------|------|------|------|------|------|------|------|------|------|------|------|------|------|------|------|------|------|------|------|------|------|------|------|------|------|------|------|------|------|------|------|------|------|------|------|------|------|------|------|------|------|------|------|------|------|------|------|------|------|------|------|------|------|------|------|------|------|------|------|------|------|------|------|------|------|------|------|------|------|------|------|------|------|------|------|------|------|------|------|------|------|------|------|------|------|------|------|----|

El-Boghdadly K, *et al.* *Reg Anesth Pain Med* 2023;0:1–11. doi: 10.1136/rapm-2023-104884

El-Boghdadly K, *et al.* *Reg Anesth Pain Med* 2023;0:1–11. doi: 10.1136/rapm-2023-104884

|   |   |   |   |   |   |   |   |   |    |    |    |    |    |    |    |    |    |    |    |    |    |    |    |    |    |    |    |    |    |    |    |    |    |    |    |    |    |    |    |    |    |    |    |    |    |    |    |    |    |    |    |    |    |    |    |    |    |    |    |    |    |    |    |    |    |    |    |    |    |    |    |    |    |    |    |    |    |    |    |    |    |    |    |    |    |    |    |    |    |    |    |    |    |    |    |    |    |    |     |     |     |     |     |     |     |     |     |     |     |     |     |     |     |     |     |     |     |     |     |     |     |     |     |     |     |     |     |     |     |     |     |     |     |     |     |     |     |     |     |     |     |     |     |     |     |     |     |     |     |     |     |     |     |     |     |     |     |     |     |     |     |     |     |     |     |     |     |     |     |     |     |     |     |     |     |     |     |     |     |     |     |     |     |     |     |     |     |     |     |     |     |     |     |     |     |     |     |     |     |     |     |     |     |     |     |     |     |     |     |     |     |     |     |     |     |     |     |     |     |     |     |     |     |     |     |     |     |     |     |     |     |     |     |     |     |     |     |     |     |     |     |     |     |     |     |     |     |     |     |     |     |     |     |     |     |     |     |     |     |     |     |     |     |     |     |     |     |     |     |     |     |     |     |     |     |     |     |     |     |     |     |     |     |     |     |     |     |     |     |     |     |     |     |     |     |     |     |     |     |     |     |     |     |     |     |     |     |     |     |     |     |     |     |     |     |     |     |     |     |     |     |     |     |     |     |     |     |     |     |     |     |     |     |     |     |     |     |     |     |     |     |     |     |     |     |     |     |     |     |     |     |     |     |     |     |     |     |     |     |     |     |     |     |     |     |     |     |     |     |     |     |     |     |     |     |     |     |     |     |     |     |     |     |     |     |     |     |     |     |     |     |     |     |     |     |     |     |     |     |     |     |     |     |     |     |     |     |     |     |     |     |     |     |     |     |     |     |     |     |     |     |     |     |     |     |     |     |     |     |     |     |     |     |     |     |     |     |     |     |     |     |     |     |     |     |     |     |     |     |     |     |     |     |     |     |     |     |     |     |     |     |     |     |     |     |     |     |     |     |     |     |     |     |     |     |     |     |     |     |     |     |     |     |     |     |     |     |     |     |     |     |     |     |     |     |     |     |     |     |     |     |     |     |     |     |     |     |     |     |     |     |     |     |     |     |     |     |     |     |     |     |     |     |     |     |     |     |     |     |     |     |     |     |     |     |     |     |     |     |     |     |     |     |     |     |     |     |     |     |     |     |     |     |     |     |     |     |     |     |     |     |     |     |     |     |     |     |     |     |     |     |     |     |     |     |     |     |     |     |     |     |     |     |     |     |     |     |     |     |     |     |     |     |     |     |     |     |     |     |     |     |     |     |     |     |     |     |     |     |     |     |     |     |     |     |     |     |     |     |     |     |     |     |     |     |     |     |     |     |     |     |     |     |     |     |     |     |     |     |     |     |     |     |     |     |     |     |     |     |     |     |     |     |     |     |     |     |     |     |     |     |     |     |     |     |     |     |     |     |     |     |     |     |     |     |     |     |     |     |     |     |     |     |     |     |     |     |     |     |     |     |     |     |     |     |     |     |     |     |     |     |     |     |     |     |     |     |     |     |     |     |     |     |     |     |     |     |     |     |     |     |     |     |     |     |     |     |     |     |     |     |     |     |     |     |     |     |     |     |     |     |     |     |     |     |     |     |     |     |     |     |     |     |     |     |     |     |     |     |     |     |     |     |     |     |     |     |     |     |     |     |     |     |     |     |     |     |     |     |     |     |     |     |     |     |     |     |     |     |     |     |     |     |     |     |     |     |     |     |     |     |     |     |     |     |     |     |     |     |     |     |     |     |     |     |     |     |     |     |     |     |     |     |     |     |     |     |     |     |     |     |     |     |     |     |     |     |     |     |     |     |     |     |     |     |     |     |     |     |     |     |     |     |     |     |     |     |     |     |     |     |     |     |     |     |     |     |     |     |     |     |     |     |     |     |     |     |     |     |     |     |     |     |     |     |     |     |     |     |     |     |     |     |     |     |     |     |     |     |     |     |     |     |     |     |     |     |     |     |     |     |     |     |     |     |     |     |     |     |     |     |     |     |     |     |     |     |     |     |     |     |     |     |     |     |     |     |     |     |     |     |     |     |     |     |     |     |     |     |     |     |     |     |     |     |     |     |     |     |     |     |     |     |     |     |     |     |     |     |     |     |     |     |     |     |     |     |     |     |     |     |     |     |     |     |     |     |     |     |     |     |     |     |     |     |     |     |     |      |      |      |      |      |      |      |      |      |      |      |      |      |      |      |      |      |      |      |      |      |      |      |      |      |      |      |      |      |      |      |      |      |      |      |      |      |      |      |      |      |      |      |      |      |      |      |      |      |      |      |      |      |      |      |      |      |      |      |      |      |      |      |      |      |      |      |      |      |      |      |      |      |      |      |      |      |      |      |      |      |      |      |      |      |      |      |      |      |      |      |      |      |      |      |      |      |      |      |      |      |      |      |      |      |      |      |      |      |      |      |      |      |      |      |      |      |      |      |      |      |      |      |      |      |      |      |      |      |      |      |      |      |      |      |      |      |      |      |      |      |      |      |      |      |      |      |      |      |      |      |      |      |      |      |      |      |      |      |      |      |      |      |      |      |      |      |      |      |      |      |      |      |      |      |      |      |      |      |      |      |      |      |      |      |      |      |      |      |      |      |      |      |      |      |      |      |      |      |      |      |      |      |      |      |      |      |      |      |      |      |      |      |      |      |      |      |      |      |      |      |      |      |      |      |      |      |      |      |      |      |      |      |      |      |      |      |      |      |      |      |      |      |      |      |      |      |      |      |      |      |      |      |      |      |      |      |      |      |      |      |      |      |      |      |      |      |      |      |      |      |      |      |      |      |      |      |      |      |      |      |      |      |      |      |      |      |      |      |      |      |      |      |      |      |      |      |      |      |      |      |      |      |      |      |      |      |      |      |      |      |      |      |      |      |      |      |      |      |      |      |      |      |      |      |      |      |      |      |      |      |      |      |      |      |      |      |      |      |      |      |      |      |      |      |      |      |      |      |      |      |      |      |      |      |      |      |      |      |      |      |      |      |      |      |      |      |      |      |      |      |      |      |      |      |      |      |      |      |      |      |      |      |      |      |      |      |      |      |      |      |      |      |      |      |      |      |      |      |      |      |      |      |      |      |      |      |      |      |      |      |      |      |      |      |      |      |      |      |      |      |      |      |      |      |      |      |      |      |      |      |      |      |      |      |      |      |      |      |      |      |      |      |      |      |      |      |      |      |      |      |      |      |      |      |      |      |      |      |      |      |      |      |      |      |      |      |      |      |      |      |      |      |      |      |      |      |      |      |      |      |      |      |      |      |      |      |    |
|---|---|---|---|---|---|---|---|---|----|----|----|----|----|----|----|----|----|----|----|----|----|----|----|----|----|----|----|----|----|----|----|----|----|----|----|----|----|----|----|----|----|----|----|----|----|----|----|----|----|----|----|----|----|----|----|----|----|----|----|----|----|----|----|----|----|----|----|----|----|----|----|----|----|----|----|----|----|----|----|----|----|----|----|----|----|----|----|----|----|----|----|----|----|----|----|----|----|----|-----|-----|-----|-----|-----|-----|-----|-----|-----|-----|-----|-----|-----|-----|-----|-----|-----|-----|-----|-----|-----|-----|-----|-----|-----|-----|-----|-----|-----|-----|-----|-----|-----|-----|-----|-----|-----|-----|-----|-----|-----|-----|-----|-----|-----|-----|-----|-----|-----|-----|-----|-----|-----|-----|-----|-----|-----|-----|-----|-----|-----|-----|-----|-----|-----|-----|-----|-----|-----|-----|-----|-----|-----|-----|-----|-----|-----|-----|-----|-----|-----|-----|-----|-----|-----|-----|-----|-----|-----|-----|-----|-----|-----|-----|-----|-----|-----|-----|-----|-----|-----|-----|-----|-----|-----|-----|-----|-----|-----|-----|-----|-----|-----|-----|-----|-----|-----|-----|-----|-----|-----|-----|-----|-----|-----|-----|-----|-----|-----|-----|-----|-----|-----|-----|-----|-----|-----|-----|-----|-----|-----|-----|-----|-----|-----|-----|-----|-----|-----|-----|-----|-----|-----|-----|-----|-----|-----|-----|-----|-----|-----|-----|-----|-----|-----|-----|-----|-----|-----|-----|-----|-----|-----|-----|-----|-----|-----|-----|-----|-----|-----|-----|-----|-----|-----|-----|-----|-----|-----|-----|-----|-----|-----|-----|-----|-----|-----|-----|-----|-----|-----|-----|-----|-----|-----|-----|-----|-----|-----|-----|-----|-----|-----|-----|-----|-----|-----|-----|-----|-----|-----|-----|-----|-----|-----|-----|-----|-----|-----|-----|-----|-----|-----|-----|-----|-----|-----|-----|-----|-----|-----|-----|-----|-----|-----|-----|-----|-----|-----|-----|-----|-----|-----|-----|-----|-----|-----|-----|-----|-----|-----|-----|-----|-----|-----|-----|-----|-----|-----|-----|-----|-----|-----|-----|-----|-----|-----|-----|-----|-----|-----|-----|-----|-----|-----|-----|-----|-----|-----|-----|-----|-----|-----|-----|-----|-----|-----|-----|-----|-----|-----|-----|-----|-----|-----|-----|-----|-----|-----|-----|-----|-----|-----|-----|-----|-----|-----|-----|-----|-----|-----|-----|-----|-----|-----|-----|-----|-----|-----|-----|-----|-----|-----|-----|-----|-----|-----|-----|-----|-----|-----|-----|-----|-----|-----|-----|-----|-----|-----|-----|-----|-----|-----|-----|-----|-----|-----|-----|-----|-----|-----|-----|-----|-----|-----|-----|-----|-----|-----|-----|-----|-----|-----|-----|-----|-----|-----|-----|-----|-----|-----|-----|-----|-----|-----|-----|-----|-----|-----|-----|-----|-----|-----|-----|-----|-----|-----|-----|-----|-----|-----|-----|-----|-----|-----|-----|-----|-----|-----|-----|-----|-----|-----|-----|-----|-----|-----|-----|-----|-----|-----|-----|-----|-----|-----|-----|-----|-----|-----|-----|-----|-----|-----|-----|-----|-----|-----|-----|-----|-----|-----|-----|-----|-----|-----|-----|-----|-----|-----|-----|-----|-----|-----|-----|-----|-----|-----|-----|-----|-----|-----|-----|-----|-----|-----|-----|-----|-----|-----|-----|-----|-----|-----|-----|-----|-----|-----|-----|-----|-----|-----|-----|-----|-----|-----|-----|-----|-----|-----|-----|-----|-----|-----|-----|-----|-----|-----|-----|-----|-----|-----|-----|-----|-----|-----|-----|-----|-----|-----|-----|-----|-----|-----|-----|-----|-----|-----|-----|-----|-----|-----|-----|-----|-----|-----|-----|-----|-----|-----|-----|-----|-----|-----|-----|-----|-----|-----|-----|-----|-----|-----|-----|-----|-----|-----|-----|-----|-----|-----|-----|-----|-----|-----|-----|-----|-----|-----|-----|-----|-----|-----|-----|-----|-----|-----|-----|-----|-----|-----|-----|-----|-----|-----|-----|-----|-----|-----|-----|-----|-----|-----|-----|-----|-----|-----|-----|-----|-----|-----|-----|-----|-----|-----|-----|-----|-----|-----|-----|-----|-----|-----|-----|-----|-----|-----|-----|-----|-----|-----|-----|-----|-----|-----|-----|-----|-----|-----|-----|-----|-----|-----|-----|-----|-----|-----|-----|-----|-----|-----|-----|-----|-----|-----|-----|-----|-----|-----|-----|-----|-----|-----|-----|-----|-----|-----|-----|-----|-----|-----|-----|-----|-----|-----|-----|-----|-----|-----|-----|-----|-----|-----|-----|-----|-----|-----|-----|-----|-----|-----|-----|-----|-----|-----|-----|-----|-----|-----|-----|-----|-----|-----|-----|-----|-----|-----|-----|-----|-----|-----|-----|-----|-----|-----|-----|-----|-----|-----|-----|-----|-----|-----|-----|-----|-----|-----|-----|-----|-----|-----|-----|-----|-----|-----|-----|-----|-----|-----|-----|-----|-----|-----|-----|-----|-----|-----|-----|-----|-----|-----|-----|-----|-----|-----|-----|-----|-----|-----|-----|-----|-----|-----|-----|-----|-----|-----|-----|-----|-----|-----|-----|-----|-----|-----|-----|-----|-----|-----|-----|-----|-----|-----|-----|-----|-----|-----|-----|-----|-----|-----|-----|-----|-----|-----|-----|-----|-----|-----|-----|-----|-----|-----|-----|-----|-----|-----|-----|-----|-----|-----|-----|-----|-----|-----|-----|-----|-----|-----|-----|-----|-----|-----|-----|-----|-----|-----|-----|-----|-----|-----|-----|-----|-----|-----|-----|-----|-----|-----|-----|-----|-----|-----|-----|-----|-----|-----|-----|-----|-----|-----|-----|-----|-----|-----|-----|-----|-----|-----|-----|-----|-----|-----|-----|-----|-----|-----|-----|-----|-----|-----|-----|-----|-----|-----|-----|-----|-----|-----|-----|-----|-----|-----|-----|-----|-----|-----|-----|-----|-----|-----|-----|-----|-----|-----|-----|-----|-----|-----|-----|-----|-----|-----|-----|-----|-----|-----|-----|-----|-----|-----|-----|-----|-----|-----|-----|-----|-----|-----|-----|-----|-----|------|------|------|------|------|------|------|------|------|------|------|------|------|------|------|------|------|------|------|------|------|------|------|------|------|------|------|------|------|------|------|------|------|------|------|------|------|------|------|------|------|------|------|------|------|------|------|------|------|------|------|------|------|------|------|------|------|------|------|------|------|------|------|------|------|------|------|------|------|------|------|------|------|------|------|------|------|------|------|------|------|------|------|------|------|------|------|------|------|------|------|------|------|------|------|------|------|------|------|------|------|------|------|------|------|------|------|------|------|------|------|------|------|------|------|------|------|------|------|------|------|------|------|------|------|------|------|------|------|------|------|------|------|------|------|------|------|------|------|------|------|------|------|------|------|------|------|------|------|------|------|------|------|------|------|------|------|------|------|------|------|------|------|------|------|------|------|------|------|------|------|------|------|------|------|------|------|------|------|------|------|------|------|------|------|------|------|------|------|------|------|------|------|------|------|------|------|------|------|------|------|------|------|------|------|------|------|------|------|------|------|------|------|------|------|------|------|------|------|------|------|------|------|------|------|------|------|------|------|------|------|------|------|------|------|------|------|------|------|------|------|------|------|------|------|------|------|------|------|------|------|------|------|------|------|------|------|------|------|------|------|------|------|------|------|------|------|------|------|------|------|------|------|------|------|------|------|------|------|------|------|------|------|------|------|------|------|------|------|------|------|------|------|------|------|------|------|------|------|------|------|------|------|------|------|------|------|------|------|------|------|------|------|------|------|------|------|------|------|------|------|------|------|------|------|------|------|------|------|------|------|------|------|------|------|------|------|------|------|------|------|------|------|------|------|------|------|------|------|------|------|------|------|------|------|------|------|------|------|------|------|------|------|------|------|------|------|------|------|------|------|------|------|------|------|------|------|------|------|------|------|------|------|------|------|------|------|------|------|------|------|------|------|------|------|------|------|------|------|------|------|------|------|------|------|------|------|------|------|------|------|------|------|------|------|------|------|------|------|------|------|------|------|------|------|------|------|------|------|------|------|------|------|------|------|------|------|------|------|------|------|------|------|------|------|------|------|------|------|------|------|------|------|------|------|------|------|------|------|------|------|------|------|------|------|------|------|------|------|------|------|------|------|------|------|------|------|------|------|------|------|------|------|------|------|------|------|----|
| 1 | 2 | 3 | 4 | 5 | 6 | 7 | 8 | 9 | 10 | 11 | 12 | 13 | 14 | 15 | 16 | 17 | 18 | 19 | 20 | 21 | 22 | 23 | 24 | 25 | 26 | 27 | 28 | 29 | 30 | 31 | 32 | 33 | 34 | 35 | 36 | 37 | 38 | 39 | 40 | 41 | 42 | 43 | 44 | 45 | 46 | 47 | 48 | 49 | 50 | 51 | 52 | 53 | 54 | 55 | 56 | 57 | 58 | 59 | 60 | 61 | 62 | 63 | 64 | 65 | 66 | 67 | 68 | 69 | 70 | 71 | 72 | 73 | 74 | 75 | 76 | 77 | 78 | 79 | 80 | 81 | 82 | 83 | 84 | 85 | 86 | 87 | 88 | 89 | 90 | 91 | 92 | 93 | 94 | 95 | 96 | 97 | 98 | 99 | 100 | 101 | 102 | 103 | 104 | 105 | 106 | 107 | 108 | 109 | 110 | 111 | 112 | 113 | 114 | 115 | 116 | 117 | 118 | 119 | 120 | 121 | 122 | 123 | 124 | 125 | 126 | 127 | 128 | 129 | 130 | 131 | 132 | 133 | 134 | 135 | 136 | 137 | 138 | 139 | 140 | 141 | 142 | 143 | 144 | 145 | 146 | 147 | 148 | 149 | 150 | 151 | 152 | 153 | 154 | 155 | 156 | 157 | 158 | 159 | 160 | 161 | 162 | 163 | 164 | 165 | 166 | 167 | 168 | 169 | 170 | 171 | 172 | 173 | 174 | 175 | 176 | 177 | 178 | 179 | 180 | 181 | 182 | 183 | 184 | 185 | 186 | 187 | 188 | 189 | 190 | 191 | 192 | 193 | 194 | 195 | 196 | 197 | 198 | 199 | 200 | 201 | 202 | 203 | 204 | 205 | 206 | 207 | 208 | 209 | 210 | 211 | 212 | 213 | 214 | 215 | 216 | 217 | 218 | 219 | 220 | 221 | 222 | 223 | 224 | 225 | 226 | 227 | 228 | 229 | 230 | 231 | 232 | 233 | 234 | 235 | 236 | 237 | 238 | 239 | 240 | 241 | 242 | 243 | 244 | 245 | 246 | 247 | 248 | 249 | 250 | 251 | 252 | 253 | 254 | 255 | 256 | 257 | 258 | 259 | 260 | 261 | 262 | 263 | 264 | 265 | 266 | 267 | 268 | 269 | 270 | 271 | 272 | 273 | 274 | 275 | 276 | 277 | 278 | 279 | 280 | 281 | 282 | 283 | 284 | 285 | 286 | 287 | 288 | 289 | 290 | 291 | 292 | 293 | 294 | 295 | 296 | 297 | 298 | 299 | 300 | 301 | 302 | 303 | 304 | 305 | 306 | 307 | 308 | 309 | 310 | 311 | 312 | 313 | 314 | 315 | 316 | 317 | 318 | 319 | 320 | 321 | 322 | 323 | 324 | 325 | 326 | 327 | 328 | 329 | 330 | 331 | 332 | 333 | 334 | 335 | 336 | 337 | 338 | 339 | 340 | 341 | 342 | 343 | 344 | 345 | 346 | 347 | 348 | 349 | 350 | 351 | 352 | 353 | 354 | 355 | 356 | 357 | 358 | 359 | 360 | 361 | 362 | 363 | 364 | 365 | 366 | 367 | 368 | 369 | 370 | 371 | 372 | 373 | 374 | 375 | 376 | 377 | 378 | 379 | 380 | 381 | 382 | 383 | 384 | 385 | 386 | 387 | 388 | 389 | 390 | 391 | 392 | 393 | 394 | 395 | 396 | 397 | 398 | 399 | 400 | 401 | 402 | 403 | 404 | 405 | 406 | 407 | 408 | 409 | 410 | 411 | 412 | 413 | 414 | 415 | 416 | 417 | 418 | 419 | 420 | 421 | 422 | 423 | 424 | 425 | 426 | 427 | 428 | 429 | 430 | 431 | 432 | 433 | 434 | 435 | 436 | 437 | 438 | 439 | 440 | 441 | 442 | 443 | 444 | 445 | 446 | 447 | 448 | 449 | 450 | 451 | 452 | 453 | 454 | 455 | 456 | 457 | 458 | 459 | 460 | 461 | 462 | 463 | 464 | 465 | 466 | 467 | 468 | 469 | 470 | 471 | 472 | 473 | 474 | 475 | 476 | 477 | 478 | 479 | 480 | 481 | 482 | 483 | 484 | 485 | 486 | 487 | 488 | 489 | 490 | 491 | 492 | 493 | 494 | 495 | 496 | 497 | 498 | 499 | 500 | 501 | 502 | 503 | 504 | 505 | 506 | 507 | 508 | 509 | 510 | 511 | 512 | 513 | 514 | 515 | 516 | 517 | 518 | 519 | 520 | 521 | 522 | 523 | 524 | 525 | 526 | 527 | 528 | 529 | 530 | 531 | 532 | 533 | 534 | 535 | 536 | 537 | 538 | 539 | 540 | 541 | 542 | 543 | 544 | 545 | 546 | 547 | 548 | 549 | 550 | 551 | 552 | 553 | 554 | 555 | 556 | 557 | 558 | 559 | 560 | 561 | 562 | 563 | 564 | 565 | 566 | 567 | 568 | 569 | 570 | 571 | 572 | 573 | 574 | 575 | 576 | 577 | 578 | 579 | 580 | 581 | 582 | 583 | 584 | 585 | 586 | 587 | 588 | 589 | 590 | 591 | 592 | 593 | 594 | 595 | 596 | 597 | 598 | 599 | 600 | 601 | 602 | 603 | 604 | 605 | 606 | 607 | 608 | 609 | 610 | 611 | 612 | 613 | 614 | 615 | 616 | 617 | 618 | 619 | 620 | 621 | 622 | 623 | 624 | 625 | 626 | 627 | 628 | 629 | 630 | 631 | 632 | 633 | 634 | 635 | 636 | 637 | 638 | 639 | 640 | 641 | 642 | 643 | 644 | 645 | 646 | 647 | 648 | 649 | 650 | 651 | 652 | 653 | 654 | 655 | 656 | 657 | 658 | 659 | 660 | 661 | 662 | 663 | 664 | 665 | 666 | 667 | 668 | 669 | 670 | 671 | 672 | 673 | 674 | 675 | 676 | 677 | 678 | 679 | 680 | 681 | 682 | 683 | 684 | 685 | 686 | 687 | 688 | 689 | 690 | 691 | 692 | 693 | 694 | 695 | 696 | 697 | 698 | 699 | 700 | 701 | 702 | 703 | 704 | 705 | 706 | 707 | 708 | 709 | 710 | 711 | 712 | 713 | 714 | 715 | 716 | 717 | 718 | 719 | 720 | 721 | 722 | 723 | 724 | 725 | 726 | 727 | 728 | 729 | 730 | 731 | 732 | 733 | 734 | 735 | 736 | 737 | 738 | 739 | 740 | 741 | 742 | 743 | 744 | 745 | 746 | 747 | 748 | 749 | 750 | 751 | 752 | 753 | 754 | 755 | 756 | 757 | 758 | 759 | 760 | 761 | 762 | 763 | 764 | 765 | 766 | 767 | 768 | 769 | 770 | 771 | 772 | 773 | 774 | 775 | 776 | 777 | 778 | 779 | 780 | 781 | 782 | 783 | 784 | 785 | 786 | 787 | 788 | 789 | 790 | 791 | 792 | 793 | 794 | 795 | 796 | 797 | 798 | 799 | 800 | 801 | 802 | 803 | 804 | 805 | 806 | 807 | 808 | 809 | 810 | 811 | 812 | 813 | 814 | 815 | 816 | 817 | 818 | 819 | 820 | 821 | 822 | 823 | 824 | 825 | 826 | 827 | 828 | 829 | 830 | 831 | 832 | 833 | 834 | 835 | 836 | 837 | 838 | 839 | 840 | 841 | 842 | 843 | 844 | 845 | 846 | 847 | 848 | 849 | 850 | 851 | 852 | 853 | 854 | 855 | 856 | 857 | 858 | 859 | 860 | 861 | 862 | 863 | 864 | 865 | 866 | 867 | 868 | 869 | 870 | 871 | 872 | 873 | 874 | 875 | 876 | 877 | 878 | 879 | 880 | 881 | 882 | 883 | 884 | 885 | 886 | 887 | 888 | 889 | 890 | 891 | 892 | 893 | 894 | 895 | 896 | 897 | 898 | 899 | 900 | 901 | 902 | 903 | 904 | 905 | 906 | 907 | 908 | 909 | 910 | 911 | 912 | 913 | 914 | 915 | 916 | 917 | 918 | 919 | 920 | 921 | 922 | 923 | 924 | 925 | 926 | 927 | 928 | 929 | 930 | 931 | 932 | 933 | 934 | 935 | 936 | 937 | 938 | 939 | 940 | 941 | 942 | 943 | 944 | 945 | 946 | 947 | 948 | 949 | 950 | 951 | 952 | 953 | 954 | 955 | 956 | 957 | 958 | 959 | 960 | 961 | 962 | 963 | 964 | 965 | 966 | 967 | 968 | 969 | 970 | 971 | 972 | 973 | 974 | 975 | 976 | 977 | 978 | 979 | 980 | 981 | 982 | 983 | 984 | 985 | 986 | 987 | 988 | 989 | 990 | 991 | 992 | 993 | 994 | 995 | 996 | 997 | 998 | 999 | 1000 | 1001 | 1002 | 1003 | 1004 | 1005 | 1006 | 1007 | 1008 | 1009 | 1010 | 1011 | 1012 | 1013 | 1014 | 1015 | 1016 | 1017 | 1018 | 1019 | 1020 | 1021 | 1022 | 1023 | 1024 | 1025 | 1026 | 1027 | 1028 | 1029 | 1030 | 1031 | 1032 | 1033 | 1034 | 1035 | 1036 | 1037 | 1038 | 1039 | 1040 | 1041 | 1042 | 1043 | 1044 | 1045 | 1046 | 1047 | 1048 | 1049 | 1050 | 1051 | 1052 | 1053 | 1054 | 1055 | 1056 | 1057 | 1058 | 1059 | 1060 | 1061 | 1062 | 1063 | 1064 | 1065 | 1066 | 1067 | 1068 | 1069 | 1070 | 1071 | 1072 | 1073 | 1074 | 1075 | 1076 | 1077 | 1078 | 1079 | 1080 | 1081 | 1082 | 1083 | 1084 | 1085 | 1086 | 1087 | 1088 | 1089 | 1090 | 1091 | 1092 | 1093 | 1094 | 1095 | 1096 | 1097 | 1098 | 1099 | 1100 | 1101 | 1102 | 1103 | 1104 | 1105 | 1106 | 1107 | 1108 | 1109 | 1110 | 1111 | 1112 | 1113 | 1114 | 1115 | 1116 | 1117 | 1118 | 1119 | 1120 | 1121 | 1122 | 1123 | 1124 | 1125 | 1126 | 1127 | 1128 | 1129 | 1130 | 1131 | 1132 | 1133 | 1134 | 1135 | 1136 | 1137 | 1138 | 1139 | 1140 | 1141 | 1142 | 1143 | 1144 | 1145 | 1146 | 1147 | 1148 | 1149 | 1150 | 1151 | 1152 | 1153 | 1154 | 1155 | 1156 | 1157 | 1158 | 1159 | 1160 | 1161 | 1162 | 1163 | 1164 | 1165 | 1166 | 1167 | 1168 | 1169 | 1170 | 1171 | 1172 | 1173 | 1174 | 1175 | 1176 | 1177 | 1178 | 1179 | 1180 | 1181 | 1182 | 1183 | 1184 | 1185 | 1186 | 1187 | 1188 | 1189 | 1190 | 1191 | 1192 | 1193 | 1194 | 1195 | 1196 | 1197 | 1198 | 1199 | 1200 | 1201 | 1202 | 1203 | 1204 | 1205 | 1206 | 1207 | 1208 | 1209 | 1210 | 1211 | 1212 | 1213 | 1214 | 1215 | 1216 | 1217 | 1218 | 1219 | 1220 | 1221 | 1222 | 1223 | 1224 | 1225 | 1226 | 1227 | 1228 | 1229 | 1230 | 1231 | 1232 | 1233 | 1234 | 1235 | 1236 | 1237 | 1238 | 1239 | 1240 | 1241 | 1242 | 1243 | 1244 | 1245 | 1246 | 1247 | 1248 | 1249 | 1250 | 1251 | 1252 | 1253 | 1254 | 1255 | 1256 | 1257 | 1258 | 1259 | 1260 | 1261 | 1262 | 1263 | 1264 | 1265 | 1266 | 1267 | 1268 | 1269 | 1270 | 1271 | 1272 | 1273 | 1274 | 1275 | 1276 | 1277 | 1278 | 1279 | 1280 | 1281 | 1282 | 1283 | 1284 | 1285 | 1286 | 1287 | 1288 | 1289 | 1290 | 1291 | 1292 | 1293 | 1294 | 1295 | 1296 | 1297 | 1298 | 1299 | 1300 | 1301 | 1302 | 1303 | 1304 | 1305 | 1306 | 1307 | 1308 | 1309 | 1310 | 1311 | 1312 | 1313 | 1314 | 1315 | 1316 | 1317 | 1318 | 1319 | 1320 | 1321 | 1322 | 1323 | 1324 | 1325 | 1326 | 1327 | 1328 | 1329 | 1330 | 1331 | 1332 | 1333 | 1334 | 1335 | 1336 | 1337 | 1338 | 1339 | 1340 | 1341 | 1342 | 1343 | 1344 | 1345 | 1346 | 1347 | 1348 | 1349 | 1350 | 1351 | 1352 | 1353 | 1354 | 1355 | 1356 | 1357 | 1358 | 1359 | 1360 | 1361 | 1362 | 1363 | 1364 | 1365 | 1366 | 1367 | 1368 | 1369 | 1370 | 1371 | 1372 | 1373 | 1374 | 1375 | 1376 | 1377 | 1378 | 1379 | 1380 | 1381 | 1382 | 1383 | 1384 | 1385 | 1386 | 1387 | 1388 | 1389 | 1390 | 1391 | 1392 | 1393 | 1394 | 1395 | 1396 | 1397 | 1398 | 1399 | 1400 | 1401 | 1402 | 1403 | 1404 | 1405 | 1406 | 1407 | 1408 | 1409 | 1410 | 1411 | 1412 | 1413 | 1414 | 1415 | 1416 | 1417 | 1418 | 1419 | 1420 | 1421 | 1422 | 1423 | 1424 | 1425 | 1426 | 1427 | 1428 | 1429 | 1430 | 1431 | 1432 | 1433 | 1434 | 1435 | 1436 | 1437 | 1438 | 1439 | 1440 | 1441 | 1442 | 1443 | 1444 | 1445 | 1446 | 1447 | 1448 | 1449 | 1450 | 1451 | 1452 | 1453 | 1454 | 1455 | 1456 | 1457 | 1458 | 1459 | 1460 | 1461 | 1462 | 1463 | 1464 | 1465 | 1466 | 1467 | 1468 | 1469 | 1470 | 1471 | 1472 | 1473 | 1474 | 1475 | 1476 | 1477 | 1478 | 1479 | 1480 | 1481 | 1482 | 1483 | 1484 | 1485 | 1486 | 14 |
|---|---|---|---|---|---|---|---|---|----|----|----|----|----|----|----|----|----|----|----|----|----|----|----|----|----|----|----|----|----|----|----|----|----|----|----|----|----|----|----|----|----|----|----|----|----|----|----|----|----|----|----|----|----|----|----|----|----|----|----|----|----|----|----|----|----|----|----|----|----|----|----|----|----|----|----|----|----|----|----|----|----|----|----|----|----|----|----|----|----|----|----|----|----|----|----|----|----|----|-----|-----|-----|-----|-----|-----|-----|-----|-----|-----|-----|-----|-----|-----|-----|-----|-----|-----|-----|-----|-----|-----|-----|-----|-----|-----|-----|-----|-----|-----|-----|-----|-----|-----|-----|-----|-----|-----|-----|-----|-----|-----|-----|-----|-----|-----|-----|-----|-----|-----|-----|-----|-----|-----|-----|-----|-----|-----|-----|-----|-----|-----|-----|-----|-----|-----|-----|-----|-----|-----|-----|-----|-----|-----|-----|-----|-----|-----|-----|-----|-----|-----|-----|-----|-----|-----|-----|-----|-----|-----|-----|-----|-----|-----|-----|-----|-----|-----|-----|-----|-----|-----|-----|-----|-----|-----|-----|-----|-----|-----|-----|-----|-----|-----|-----|-----|-----|-----|-----|-----|-----|-----|-----|-----|-----|-----|-----|-----|-----|-----|-----|-----|-----|-----|-----|-----|-----|-----|-----|-----|-----|-----|-----|-----|-----|-----|-----|-----|-----|-----|-----|-----|-----|-----|-----|-----|-----|-----|-----|-----|-----|-----|-----|-----|-----|-----|-----|-----|-----|-----|-----|-----|-----|-----|-----|-----|-----|-----|-----|-----|-----|-----|-----|-----|-----|-----|-----|-----|-----|-----|-----|-----|-----|-----|-----|-----|-----|-----|-----|-----|-----|-----|-----|-----|-----|-----|-----|-----|-----|-----|-----|-----|-----|-----|-----|-----|-----|-----|-----|-----|-----|-----|-----|-----|-----|-----|-----|-----|-----|-----|-----|-----|-----|-----|-----|-----|-----|-----|-----|-----|-----|-----|-----|-----|-----|-----|-----|-----|-----|-----|-----|-----|-----|-----|-----|-----|-----|-----|-----|-----|-----|-----|-----|-----|-----|-----|-----|-----|-----|-----|-----|-----|-----|-----|-----|-----|-----|-----|-----|-----|-----|-----|-----|-----|-----|-----|-----|-----|-----|-----|-----|-----|-----|-----|-----|-----|-----|-----|-----|-----|-----|-----|-----|-----|-----|-----|-----|-----|-----|-----|-----|-----|-----|-----|-----|-----|-----|-----|-----|-----|-----|-----|-----|-----|-----|-----|-----|-----|-----|-----|-----|-----|-----|-----|-----|-----|-----|-----|-----|-----|-----|-----|-----|-----|-----|-----|-----|-----|-----|-----|-----|-----|-----|-----|-----|-----|-----|-----|-----|-----|-----|-----|-----|-----|-----|-----|-----|-----|-----|-----|-----|-----|-----|-----|-----|-----|-----|-----|-----|-----|-----|-----|-----|-----|-----|-----|-----|-----|-----|-----|-----|-----|-----|-----|-----|-----|-----|-----|-----|-----|-----|-----|-----|-----|-----|-----|-----|-----|-----|-----|-----|-----|-----|-----|-----|-----|-----|-----|-----|-----|-----|-----|-----|-----|-----|-----|-----|-----|-----|-----|-----|-----|-----|-----|-----|-----|-----|-----|-----|-----|-----|-----|-----|-----|-----|-----|-----|-----|-----|-----|-----|-----|-----|-----|-----|-----|-----|-----|-----|-----|-----|-----|-----|-----|-----|-----|-----|-----|-----|-----|-----|-----|-----|-----|-----|-----|-----|-----|-----|-----|-----|-----|-----|-----|-----|-----|-----|-----|-----|-----|-----|-----|-----|-----|-----|-----|-----|-----|-----|-----|-----|-----|-----|-----|-----|-----|-----|-----|-----|-----|-----|-----|-----|-----|-----|-----|-----|-----|-----|-----|-----|-----|-----|-----|-----|-----|-----|-----|-----|-----|-----|-----|-----|-----|-----|-----|-----|-----|-----|-----|-----|-----|-----|-----|-----|-----|-----|-----|-----|-----|-----|-----|-----|-----|-----|-----|-----|-----|-----|-----|-----|-----|-----|-----|-----|-----|-----|-----|-----|-----|-----|-----|-----|-----|-----|-----|-----|-----|-----|-----|-----|-----|-----|-----|-----|-----|-----|-----|-----|-----|-----|-----|-----|-----|-----|-----|-----|-----|-----|-----|-----|-----|-----|-----|-----|-----|-----|-----|-----|-----|-----|-----|-----|-----|-----|-----|-----|-----|-----|-----|-----|-----|-----|-----|-----|-----|-----|-----|-----|-----|-----|-----|-----|-----|-----|-----|-----|-----|-----|-----|-----|-----|-----|-----|-----|-----|-----|-----|-----|-----|-----|-----|-----|-----|-----|-----|-----|-----|-----|-----|-----|-----|-----|-----|-----|-----|-----|-----|-----|-----|-----|-----|-----|-----|-----|-----|-----|-----|-----|-----|-----|-----|-----|-----|-----|-----|-----|-----|-----|-----|-----|-----|-----|-----|-----|-----|-----|-----|-----|-----|-----|-----|-----|-----|-----|-----|-----|-----|-----|-----|-----|-----|-----|-----|-----|-----|-----|-----|-----|-----|-----|-----|-----|-----|-----|-----|-----|-----|-----|-----|-----|-----|-----|-----|-----|-----|-----|-----|-----|-----|-----|-----|-----|-----|-----|-----|-----|-----|-----|-----|-----|-----|-----|-----|-----|-----|-----|-----|-----|-----|-----|-----|-----|-----|-----|-----|-----|-----|-----|-----|-----|-----|-----|-----|-----|-----|-----|-----|-----|-----|-----|-----|-----|-----|-----|-----|-----|-----|-----|-----|-----|-----|-----|-----|-----|-----|-----|-----|-----|-----|-----|-----|-----|-----|-----|-----|-----|-----|-----|-----|-----|-----|-----|-----|-----|-----|-----|-----|-----|-----|-----|-----|-----|-----|-----|-----|-----|-----|-----|-----|-----|-----|-----|-----|-----|-----|-----|-----|-----|-----|-----|-----|-----|-----|-----|-----|-----|-----|-----|-----|-----|-----|-----|-----|-----|-----|-----|-----|-----|-----|-----|-----|-----|-----|-----|-----|-----|-----|-----|-----|-----|-----|-----|-----|-----|-----|-----|-----|-----|-----|-----|-----|-----|-----|-----|-----|-----|-----|-----|-----|-----|-----|-----|-----|-----|-----|-----|-----|-----|-----|------|------|------|------|------|------|------|------|------|------|------|------|------|------|------|------|------|------|------|------|------|------|------|------|------|------|------|------|------|------|------|------|------|------|------|------|------|------|------|------|------|------|------|------|------|------|------|------|------|------|------|------|------|------|------|------|------|------|------|------|------|------|------|------|------|------|------|------|------|------|------|------|------|------|------|------|------|------|------|------|------|------|------|------|------|------|------|------|------|------|------|------|------|------|------|------|------|------|------|------|------|------|------|------|------|------|------|------|------|------|------|------|------|------|------|------|------|------|------|------|------|------|------|------|------|------|------|------|------|------|------|------|------|------|------|------|------|------|------|------|------|------|------|------|------|------|------|------|------|------|------|------|------|------|------|------|------|------|------|------|------|------|------|------|------|------|------|------|------|------|------|------|------|------|------|------|------|------|------|------|------|------|------|------|------|------|------|------|------|------|------|------|------|------|------|------|------|------|------|------|------|------|------|------|------|------|------|------|------|------|------|------|------|------|------|------|------|------|------|------|------|------|------|------|------|------|------|------|------|------|------|------|------|------|------|------|------|------|------|------|------|------|------|------|------|------|------|------|------|------|------|------|------|------|------|------|------|------|------|------|------|------|------|------|------|------|------|------|------|------|------|------|------|------|------|------|------|------|------|------|------|------|------|------|------|------|------|------|------|------|------|------|------|------|------|------|------|------|------|------|------|------|------|------|------|------|------|------|------|------|------|------|------|------|------|------|------|------|------|------|------|------|------|------|------|------|------|------|------|------|------|------|------|------|------|------|------|------|------|------|------|------|------|------|------|------|------|------|------|------|------|------|------|------|------|------|------|------|------|------|------|------|------|------|------|------|------|------|------|------|------|------|------|------|------|------|------|------|------|------|------|------|------|------|------|------|------|------|------|------|------|------|------|------|------|------|------|------|------|------|------|------|------|------|------|------|------|------|------|------|------|------|------|------|------|------|------|------|------|------|------|------|------|------|------|------|------|------|------|------|------|------|------|------|------|------|------|------|------|------|------|------|------|------|------|------|------|------|------|------|------|------|------|------|------|------|------|------|------|------|------|------|------|------|------|------|------|------|------|------|------|------|------|------|------|------|------|------|------|------|------|------|------|------|------|------|------|----|

El-Boghdadly K, et al. *Reg Anesth Pain Med* 2023;0:1–11. doi: 10.1136/rapm-2023-104884

[illegible]

|   |   |   |   |   |   |   |   |   |    |    |    |    |    |    |    |    |    |    |    |    |    |    |    |    |    |    |    |    |    |    |    |    |    |    |    |    |    |    |    |    |    |    |    |    |    |    |    |    |    |    |    |    |    |    |    |    |    |    |    |    |    |    |    |    |    |    |    |    |    |    |    |    |    |    |    |    |    |    |    |    |    |    |    |    |    |    |    |    |    |    |    |    |    |    |    |    |    |    |     |     |     |     |     |     |     |     |     |     |     |     |     |     |     |     |     |     |     |     |     |     |     |     |     |     |     |     |     |     |     |     |     |     |     |     |     |     |     |     |     |     |     |     |     |     |     |     |     |     |     |     |     |     |     |     |     |     |     |     |     |     |     |     |     |     |     |     |     |     |     |     |     |     |     |     |     |     |     |     |     |     |     |     |     |     |     |     |     |     |     |     |     |     |     |     |     |     |     |     |     |     |     |     |     |     |     |     |     |     |     |     |     |     |     |     |     |     |     |     |     |     |     |     |     |     |     |     |     |     |     |     |     |     |     |     |     |     |     |     |     |     |     |     |     |     |     |     |     |     |     |     |     |     |     |     |     |     |     |     |     |     |     |     |     |     |     |     |     |     |     |     |     |     |     |     |     |     |     |     |     |     |     |     |     |     |     |     |     |     |     |     |     |     |     |     |     |     |     |     |     |     |     |     |     |     |     |     |     |     |     |     |     |     |     |     |     |     |     |     |     |     |     |     |     |     |     |     |     |     |     |     |     |     |     |     |     |     |     |     |     |     |     |     |     |     |     |     |     |     |     |     |     |     |     |     |     |     |     |     |     |     |     |     |     |     |     |     |     |     |     |     |     |     |     |     |     |     |     |     |     |     |     |     |     |     |     |     |     |     |     |     |     |     |     |     |     |     |     |     |     |     |     |     |     |     |     |     |     |     |     |     |     |     |     |     |     |     |     |     |     |     |     |     |     |     |     |     |     |     |     |     |     |     |     |     |     |     |     |     |     |     |     |     |     |     |     |     |     |     |     |     |     |     |     |     |     |     |     |     |     |     |     |     |     |     |     |     |     |     |     |     |     |     |     |     |     |     |     |     |     |     |     |     |     |     |     |     |     |     |     |     |     |     |     |     |     |     |     |     |     |     |     |     |     |     |     |     |     |     |     |     |     |     |     |     |     |     |     |     |     |     |     |     |     |     |     |     |     |     |     |     |     |     |     |     |     |     |     |     |     |     |     |     |     |     |     |     |     |     |     |     |     |     |     |     |     |     |     |     |     |     |     |     |     |     |     |     |     |     |     |     |     |     |     |     |     |     |     |     |     |     |     |     |     |     |     |     |     |     |     |     |     |     |     |     |     |     |     |     |     |     |     |     |     |     |     |     |     |     |     |     |     |     |     |     |     |     |     |     |     |     |     |     |     |     |     |     |     |     |     |     |     |     |     |     |     |     |     |     |     |     |     |     |     |     |     |     |     |     |     |     |     |     |     |     |     |     |     |     |     |     |     |     |     |     |     |     |     |     |     |     |     |     |     |     |     |     |     |     |     |     |     |     |     |     |     |     |     |     |     |     |     |     |     |     |     |     |     |     |     |     |     |     |     |     |     |     |     |     |     |     |     |     |     |     |     |     |     |     |     |     |     |     |     |     |     |     |     |     |     |     |     |     |     |     |     |     |     |     |     |     |     |     |     |     |     |     |     |     |     |     |     |     |     |     |     |     |     |     |     |     |     |     |     |     |     |     |     |     |     |     |     |     |     |     |     |     |     |     |     |     |     |     |     |     |     |     |     |     |     |     |     |     |     |     |     |     |     |     |     |     |     |     |     |     |     |     |     |     |     |     |     |     |     |     |     |     |     |     |     |     |     |     |     |     |     |     |     |     |     |     |     |     |     |     |     |     |     |     |     |     |     |     |     |     |     |     |     |     |     |     |     |     |     |     |     |     |     |     |     |     |     |     |     |     |     |     |     |     |     |     |     |     |     |     |     |     |     |     |     |     |     |     |     |     |     |     |     |     |     |     |     |     |     |     |     |     |     |     |     |     |     |     |     |     |     |     |     |     |     |     |     |     |     |     |     |     |     |     |     |     |     |     |     |     |     |     |     |     |     |     |     |     |     |     |     |     |     |     |     |     |     |     |     |     |     |     |     |     |     |     |     |     |     |     |     |     |     |     |     |     |     |     |     |     |     |     |     |     |     |     |     |     |     |     |     |     |     |     |     |     |     |     |     |     |     |     |     |     |     |     |     |     |     |     |     |     |     |     |      |      |      |      |      |      |      |      |      |      |      |      |      |      |      |      |      |      |      |      |      |      |      |      |      |      |      |      |      |      |      |      |      |      |      |      |      |      |      |      |      |      |      |      |      |      |      |      |      |      |      |      |      |      |      |      |      |      |      |      |      |      |      |      |      |      |      |      |      |      |      |      |      |      |      |      |      |      |      |      |      |      |      |      |      |      |      |      |      |      |      |      |      |      |      |      |      |      |      |      |      |      |      |      |      |      |      |      |      |      |      |      |      |      |      |      |      |      |      |      |      |      |      |      |      |      |      |      |      |      |      |      |      |      |      |      |      |      |      |      |      |      |      |      |      |      |      |      |      |      |      |      |      |      |      |      |      |      |      |      |      |      |      |      |      |      |      |      |      |      |      |      |      |      |      |      |      |      |      |      |      |      |      |      |      |      |      |      |      |      |      |      |      |      |      |      |      |      |      |      |      |      |      |      |      |      |      |      |      |      |      |      |      |      |      |      |      |      |      |      |      |      |      |      |      |      |      |      |      |      |      |      |      |      |      |      |      |      |      |      |      |      |      |      |      |      |      |      |      |      |      |      |      |      |      |      |      |      |      |      |      |      |      |      |      |      |      |      |      |      |      |      |      |      |      |      |      |      |      |      |      |      |      |      |      |      |      |      |      |      |      |      |      |      |      |      |      |      |      |      |      |      |      |      |      |      |      |      |      |      |      |      |      |      |      |      |      |      |      |      |      |      |      |      |      |      |      |      |      |      |      |      |      |      |      |      |      |      |      |      |      |      |      |      |      |      |      |      |      |      |      |      |      |      |      |      |      |      |      |      |      |      |      |      |      |      |      |      |      |      |      |      |      |      |      |      |      |      |      |      |      |      |      |      |      |      |      |      |      |      |      |      |      |      |      |      |      |      |      |      |      |      |      |      |      |      |      |      |      |      |      |      |      |      |      |      |      |      |      |      |      |      |      |      |      |      |      |      |      |      |      |      |      |      |      |      |      |      |      |      |      |      |      |      |      |      |      |      |      |      |      |      |      |      |      |      |      |      |      |      |      |      |      |      |      |      |      |      |      |      |      |      |      |      |      |      |      |      |      |      |      |      |      |      |      |      |      |    |
|---|---|---|---|---|---|---|---|---|----|----|----|----|----|----|----|----|----|----|----|----|----|----|----|----|----|----|----|----|----|----|----|----|----|----|----|----|----|----|----|----|----|----|----|----|----|----|----|----|----|----|----|----|----|----|----|----|----|----|----|----|----|----|----|----|----|----|----|----|----|----|----|----|----|----|----|----|----|----|----|----|----|----|----|----|----|----|----|----|----|----|----|----|----|----|----|----|----|----|-----|-----|-----|-----|-----|-----|-----|-----|-----|-----|-----|-----|-----|-----|-----|-----|-----|-----|-----|-----|-----|-----|-----|-----|-----|-----|-----|-----|-----|-----|-----|-----|-----|-----|-----|-----|-----|-----|-----|-----|-----|-----|-----|-----|-----|-----|-----|-----|-----|-----|-----|-----|-----|-----|-----|-----|-----|-----|-----|-----|-----|-----|-----|-----|-----|-----|-----|-----|-----|-----|-----|-----|-----|-----|-----|-----|-----|-----|-----|-----|-----|-----|-----|-----|-----|-----|-----|-----|-----|-----|-----|-----|-----|-----|-----|-----|-----|-----|-----|-----|-----|-----|-----|-----|-----|-----|-----|-----|-----|-----|-----|-----|-----|-----|-----|-----|-----|-----|-----|-----|-----|-----|-----|-----|-----|-----|-----|-----|-----|-----|-----|-----|-----|-----|-----|-----|-----|-----|-----|-----|-----|-----|-----|-----|-----|-----|-----|-----|-----|-----|-----|-----|-----|-----|-----|-----|-----|-----|-----|-----|-----|-----|-----|-----|-----|-----|-----|-----|-----|-----|-----|-----|-----|-----|-----|-----|-----|-----|-----|-----|-----|-----|-----|-----|-----|-----|-----|-----|-----|-----|-----|-----|-----|-----|-----|-----|-----|-----|-----|-----|-----|-----|-----|-----|-----|-----|-----|-----|-----|-----|-----|-----|-----|-----|-----|-----|-----|-----|-----|-----|-----|-----|-----|-----|-----|-----|-----|-----|-----|-----|-----|-----|-----|-----|-----|-----|-----|-----|-----|-----|-----|-----|-----|-----|-----|-----|-----|-----|-----|-----|-----|-----|-----|-----|-----|-----|-----|-----|-----|-----|-----|-----|-----|-----|-----|-----|-----|-----|-----|-----|-----|-----|-----|-----|-----|-----|-----|-----|-----|-----|-----|-----|-----|-----|-----|-----|-----|-----|-----|-----|-----|-----|-----|-----|-----|-----|-----|-----|-----|-----|-----|-----|-----|-----|-----|-----|-----|-----|-----|-----|-----|-----|-----|-----|-----|-----|-----|-----|-----|-----|-----|-----|-----|-----|-----|-----|-----|-----|-----|-----|-----|-----|-----|-----|-----|-----|-----|-----|-----|-----|-----|-----|-----|-----|-----|-----|-----|-----|-----|-----|-----|-----|-----|-----|-----|-----|-----|-----|-----|-----|-----|-----|-----|-----|-----|-----|-----|-----|-----|-----|-----|-----|-----|-----|-----|-----|-----|-----|-----|-----|-----|-----|-----|-----|-----|-----|-----|-----|-----|-----|-----|-----|-----|-----|-----|-----|-----|-----|-----|-----|-----|-----|-----|-----|-----|-----|-----|-----|-----|-----|-----|-----|-----|-----|-----|-----|-----|-----|-----|-----|-----|-----|-----|-----|-----|-----|-----|-----|-----|-----|-----|-----|-----|-----|-----|-----|-----|-----|-----|-----|-----|-----|-----|-----|-----|-----|-----|-----|-----|-----|-----|-----|-----|-----|-----|-----|-----|-----|-----|-----|-----|-----|-----|-----|-----|-----|-----|-----|-----|-----|-----|-----|-----|-----|-----|-----|-----|-----|-----|-----|-----|-----|-----|-----|-----|-----|-----|-----|-----|-----|-----|-----|-----|-----|-----|-----|-----|-----|-----|-----|-----|-----|-----|-----|-----|-----|-----|-----|-----|-----|-----|-----|-----|-----|-----|-----|-----|-----|-----|-----|-----|-----|-----|-----|-----|-----|-----|-----|-----|-----|-----|-----|-----|-----|-----|-----|-----|-----|-----|-----|-----|-----|-----|-----|-----|-----|-----|-----|-----|-----|-----|-----|-----|-----|-----|-----|-----|-----|-----|-----|-----|-----|-----|-----|-----|-----|-----|-----|-----|-----|-----|-----|-----|-----|-----|-----|-----|-----|-----|-----|-----|-----|-----|-----|-----|-----|-----|-----|-----|-----|-----|-----|-----|-----|-----|-----|-----|-----|-----|-----|-----|-----|-----|-----|-----|-----|-----|-----|-----|-----|-----|-----|-----|-----|-----|-----|-----|-----|-----|-----|-----|-----|-----|-----|-----|-----|-----|-----|-----|-----|-----|-----|-----|-----|-----|-----|-----|-----|-----|-----|-----|-----|-----|-----|-----|-----|-----|-----|-----|-----|-----|-----|-----|-----|-----|-----|-----|-----|-----|-----|-----|-----|-----|-----|-----|-----|-----|-----|-----|-----|-----|-----|-----|-----|-----|-----|-----|-----|-----|-----|-----|-----|-----|-----|-----|-----|-----|-----|-----|-----|-----|-----|-----|-----|-----|-----|-----|-----|-----|-----|-----|-----|-----|-----|-----|-----|-----|-----|-----|-----|-----|-----|-----|-----|-----|-----|-----|-----|-----|-----|-----|-----|-----|-----|-----|-----|-----|-----|-----|-----|-----|-----|-----|-----|-----|-----|-----|-----|-----|-----|-----|-----|-----|-----|-----|-----|-----|-----|-----|-----|-----|-----|-----|-----|-----|-----|-----|-----|-----|-----|-----|-----|-----|-----|-----|-----|-----|-----|-----|-----|-----|-----|-----|-----|-----|-----|-----|-----|-----|-----|-----|-----|-----|-----|-----|-----|-----|-----|-----|-----|-----|-----|-----|-----|-----|-----|-----|-----|-----|-----|-----|-----|-----|-----|-----|-----|-----|-----|-----|-----|-----|-----|-----|-----|-----|-----|-----|-----|-----|-----|-----|-----|-----|-----|-----|-----|-----|-----|-----|-----|-----|-----|-----|-----|-----|-----|-----|-----|-----|-----|-----|-----|-----|-----|-----|-----|-----|-----|-----|-----|-----|-----|-----|-----|-----|-----|-----|-----|-----|-----|-----|-----|-----|-----|-----|-----|-----|-----|-----|-----|-----|-----|-----|-----|-----|-----|-----|-----|-----|-----|-----|-----|-----|-----|-----|-----|-----|-----|-----|-----|-----|-----|-----|-----|-----|-----|-----|-----|-----|-----|------|------|------|------|------|------|------|------|------|------|------|------|------|------|------|------|------|------|------|------|------|------|------|------|------|------|------|------|------|------|------|------|------|------|------|------|------|------|------|------|------|------|------|------|------|------|------|------|------|------|------|------|------|------|------|------|------|------|------|------|------|------|------|------|------|------|------|------|------|------|------|------|------|------|------|------|------|------|------|------|------|------|------|------|------|------|------|------|------|------|------|------|------|------|------|------|------|------|------|------|------|------|------|------|------|------|------|------|------|------|------|------|------|------|------|------|------|------|------|------|------|------|------|------|------|------|------|------|------|------|------|------|------|------|------|------|------|------|------|------|------|------|------|------|------|------|------|------|------|------|------|------|------|------|------|------|------|------|------|------|------|------|------|------|------|------|------|------|------|------|------|------|------|------|------|------|------|------|------|------|------|------|------|------|------|------|------|------|------|------|------|------|------|------|------|------|------|------|------|------|------|------|------|------|------|------|------|------|------|------|------|------|------|------|------|------|------|------|------|------|------|------|------|------|------|------|------|------|------|------|------|------|------|------|------|------|------|------|------|------|------|------|------|------|------|------|------|------|------|------|------|------|------|------|------|------|------|------|------|------|------|------|------|------|------|------|------|------|------|------|------|------|------|------|------|------|------|------|------|------|------|------|------|------|------|------|------|------|------|------|------|------|------|------|------|------|------|------|------|------|------|------|------|------|------|------|------|------|------|------|------|------|------|------|------|------|------|------|------|------|------|------|------|------|------|------|------|------|------|------|------|------|------|------|------|------|------|------|------|------|------|------|------|------|------|------|------|------|------|------|------|------|------|------|------|------|------|------|------|------|------|------|------|------|------|------|------|------|------|------|------|------|------|------|------|------|------|------|------|------|------|------|------|------|------|------|------|------|------|------|------|------|------|------|------|------|------|------|------|------|------|------|------|------|------|------|------|------|------|------|------|------|------|------|------|------|------|------|------|------|------|------|------|------|------|------|------|------|------|------|------|------|------|------|------|------|------|------|------|------|------|------|------|------|------|------|------|------|------|------|------|------|------|------|------|------|------|------|------|------|------|------|------|------|------|------|------|------|------|------|------|------|------|------|------|------|------|------|------|------|------|------|------|------|------|------|------|----|
| 1 | 2 | 3 | 4 | 5 | 6 | 7 | 8 | 9 | 10 | 11 | 12 | 13 | 14 | 15 | 16 | 17 | 18 | 19 | 20 | 21 | 22 | 23 | 24 | 25 | 26 | 27 | 28 | 29 | 30 | 31 | 32 | 33 | 34 | 35 | 36 | 37 | 38 | 39 | 40 | 41 | 42 | 43 | 44 | 45 | 46 | 47 | 48 | 49 | 50 | 51 | 52 | 53 | 54 | 55 | 56 | 57 | 58 | 59 | 60 | 61 | 62 | 63 | 64 | 65 | 66 | 67 | 68 | 69 | 70 | 71 | 72 | 73 | 74 | 75 | 76 | 77 | 78 | 79 | 80 | 81 | 82 | 83 | 84 | 85 | 86 | 87 | 88 | 89 | 90 | 91 | 92 | 93 | 94 | 95 | 96 | 97 | 98 | 99 | 100 | 101 | 102 | 103 | 104 | 105 | 106 | 107 | 108 | 109 | 110 | 111 | 112 | 113 | 114 | 115 | 116 | 117 | 118 | 119 | 120 | 121 | 122 | 123 | 124 | 125 | 126 | 127 | 128 | 129 | 130 | 131 | 132 | 133 | 134 | 135 | 136 | 137 | 138 | 139 | 140 | 141 | 142 | 143 | 144 | 145 | 146 | 147 | 148 | 149 | 150 | 151 | 152 | 153 | 154 | 155 | 156 | 157 | 158 | 159 | 160 | 161 | 162 | 163 | 164 | 165 | 166 | 167 | 168 | 169 | 170 | 171 | 172 | 173 | 174 | 175 | 176 | 177 | 178 | 179 | 180 | 181 | 182 | 183 | 184 | 185 | 186 | 187 | 188 | 189 | 190 | 191 | 192 | 193 | 194 | 195 | 196 | 197 | 198 | 199 | 200 | 201 | 202 | 203 | 204 | 205 | 206 | 207 | 208 | 209 | 210 | 211 | 212 | 213 | 214 | 215 | 216 | 217 | 218 | 219 | 220 | 221 | 222 | 223 | 224 | 225 | 226 | 227 | 228 | 229 | 230 | 231 | 232 | 233 | 234 | 235 | 236 | 237 | 238 | 239 | 240 | 241 | 242 | 243 | 244 | 245 | 246 | 247 | 248 | 249 | 250 | 251 | 252 | 253 | 254 | 255 | 256 | 257 | 258 | 259 | 260 | 261 | 262 | 263 | 264 | 265 | 266 | 267 | 268 | 269 | 270 | 271 | 272 | 273 | 274 | 275 | 276 | 277 | 278 | 279 | 280 | 281 | 282 | 283 | 284 | 285 | 286 | 287 | 288 | 289 | 290 | 291 | 292 | 293 | 294 | 295 | 296 | 297 | 298 | 299 | 300 | 301 | 302 | 303 | 304 | 305 | 306 | 307 | 308 | 309 | 310 | 311 | 312 | 313 | 314 | 315 | 316 | 317 | 318 | 319 | 320 | 321 | 322 | 323 | 324 | 325 | 326 | 327 | 328 | 329 | 330 | 331 | 332 | 333 | 334 | 335 | 336 | 337 | 338 | 339 | 340 | 341 | 342 | 343 | 344 | 345 | 346 | 347 | 348 | 349 | 350 | 351 | 352 | 353 | 354 | 355 | 356 | 357 | 358 | 359 | 360 | 361 | 362 | 363 | 364 | 365 | 366 | 367 | 368 | 369 | 370 | 371 | 372 | 373 | 374 | 375 | 376 | 377 | 378 | 379 | 380 | 381 | 382 | 383 | 384 | 385 | 386 | 387 | 388 | 389 | 390 | 391 | 392 | 393 | 394 | 395 | 396 | 397 | 398 | 399 | 400 | 401 | 402 | 403 | 404 | 405 | 406 | 407 | 408 | 409 | 410 | 411 | 412 | 413 | 414 | 415 | 416 | 417 | 418 | 419 | 420 | 421 | 422 | 423 | 424 | 425 | 426 | 427 | 428 | 429 | 430 | 431 | 432 | 433 | 434 | 435 | 436 | 437 | 438 | 439 | 440 | 441 | 442 | 443 | 444 | 445 | 446 | 447 | 448 | 449 | 450 | 451 | 452 | 453 | 454 | 455 | 456 | 457 | 458 | 459 | 460 | 461 | 462 | 463 | 464 | 465 | 466 | 467 | 468 | 469 | 470 | 471 | 472 | 473 | 474 | 475 | 476 | 477 | 478 | 479 | 480 | 481 | 482 | 483 | 484 | 485 | 486 | 487 | 488 | 489 | 490 | 491 | 492 | 493 | 494 | 495 | 496 | 497 | 498 | 499 | 500 | 501 | 502 | 503 | 504 | 505 | 506 | 507 | 508 | 509 | 510 | 511 | 512 | 513 | 514 | 515 | 516 | 517 | 518 | 519 | 520 | 521 | 522 | 523 | 524 | 525 | 526 | 527 | 528 | 529 | 530 | 531 | 532 | 533 | 534 | 535 | 536 | 537 | 538 | 539 | 540 | 541 | 542 | 543 | 544 | 545 | 546 | 547 | 548 | 549 | 550 | 551 | 552 | 553 | 554 | 555 | 556 | 557 | 558 | 559 | 560 | 561 | 562 | 563 | 564 | 565 | 566 | 567 | 568 | 569 | 570 | 571 | 572 | 573 | 574 | 575 | 576 | 577 | 578 | 579 | 580 | 581 | 582 | 583 | 584 | 585 | 586 | 587 | 588 | 589 | 590 | 591 | 592 | 593 | 594 | 595 | 596 | 597 | 598 | 599 | 600 | 601 | 602 | 603 | 604 | 605 | 606 | 607 | 608 | 609 | 610 | 611 | 612 | 613 | 614 | 615 | 616 | 617 | 618 | 619 | 620 | 621 | 622 | 623 | 624 | 625 | 626 | 627 | 628 | 629 | 630 | 631 | 632 | 633 | 634 | 635 | 636 | 637 | 638 | 639 | 640 | 641 | 642 | 643 | 644 | 645 | 646 | 647 | 648 | 649 | 650 | 651 | 652 | 653 | 654 | 655 | 656 | 657 | 658 | 659 | 660 | 661 | 662 | 663 | 664 | 665 | 666 | 667 | 668 | 669 | 670 | 671 | 672 | 673 | 674 | 675 | 676 | 677 | 678 | 679 | 680 | 681 | 682 | 683 | 684 | 685 | 686 | 687 | 688 | 689 | 690 | 691 | 692 | 693 | 694 | 695 | 696 | 697 | 698 | 699 | 700 | 701 | 702 | 703 | 704 | 705 | 706 | 707 | 708 | 709 | 710 | 711 | 712 | 713 | 714 | 715 | 716 | 717 | 718 | 719 | 720 | 721 | 722 | 723 | 724 | 725 | 726 | 727 | 728 | 729 | 730 | 731 | 732 | 733 | 734 | 735 | 736 | 737 | 738 | 739 | 740 | 741 | 742 | 743 | 744 | 745 | 746 | 747 | 748 | 749 | 750 | 751 | 752 | 753 | 754 | 755 | 756 | 757 | 758 | 759 | 760 | 761 | 762 | 763 | 764 | 765 | 766 | 767 | 768 | 769 | 770 | 771 | 772 | 773 | 774 | 775 | 776 | 777 | 778 | 779 | 780 | 781 | 782 | 783 | 784 | 785 | 786 | 787 | 788 | 789 | 790 | 791 | 792 | 793 | 794 | 795 | 796 | 797 | 798 | 799 | 800 | 801 | 802 | 803 | 804 | 805 | 806 | 807 | 808 | 809 | 810 | 811 | 812 | 813 | 814 | 815 | 816 | 817 | 818 | 819 | 820 | 821 | 822 | 823 | 824 | 825 | 826 | 827 | 828 | 829 | 830 | 831 | 832 | 833 | 834 | 835 | 836 | 837 | 838 | 839 | 840 | 841 | 842 | 843 | 844 | 845 | 846 | 847 | 848 | 849 | 850 | 851 | 852 | 853 | 854 | 855 | 856 | 857 | 858 | 859 | 860 | 861 | 862 | 863 | 864 | 865 | 866 | 867 | 868 | 869 | 870 | 871 | 872 | 873 | 874 | 875 | 876 | 877 | 878 | 879 | 880 | 881 | 882 | 883 | 884 | 885 | 886 | 887 | 888 | 889 | 890 | 891 | 892 | 893 | 894 | 895 | 896 | 897 | 898 | 899 | 900 | 901 | 902 | 903 | 904 | 905 | 906 | 907 | 908 | 909 | 910 | 911 | 912 | 913 | 914 | 915 | 916 | 917 | 918 | 919 | 920 | 921 | 922 | 923 | 924 | 925 | 926 | 927 | 928 | 929 | 930 | 931 | 932 | 933 | 934 | 935 | 936 | 937 | 938 | 939 | 940 | 941 | 942 | 943 | 944 | 945 | 946 | 947 | 948 | 949 | 950 | 951 | 952 | 953 | 954 | 955 | 956 | 957 | 958 | 959 | 960 | 961 | 962 | 963 | 964 | 965 | 966 | 967 | 968 | 969 | 970 | 971 | 972 | 973 | 974 | 975 | 976 | 977 | 978 | 979 | 980 | 981 | 982 | 983 | 984 | 985 | 986 | 987 | 988 | 989 | 990 | 991 | 992 | 993 | 994 | 995 | 996 | 997 | 998 | 999 | 1000 | 1001 | 1002 | 1003 | 1004 | 1005 | 1006 | 1007 | 1008 | 1009 | 1010 | 1011 | 1012 | 1013 | 1014 | 1015 | 1016 | 1017 | 1018 | 1019 | 1020 | 1021 | 1022 | 1023 | 1024 | 1025 | 1026 | 1027 | 1028 | 1029 | 1030 | 1031 | 1032 | 1033 | 1034 | 1035 | 1036 | 1037 | 1038 | 1039 | 1040 | 1041 | 1042 | 1043 | 1044 | 1045 | 1046 | 1047 | 1048 | 1049 | 1050 | 1051 | 1052 | 1053 | 1054 | 1055 | 1056 | 1057 | 1058 | 1059 | 1060 | 1061 | 1062 | 1063 | 1064 | 1065 | 1066 | 1067 | 1068 | 1069 | 1070 | 1071 | 1072 | 1073 | 1074 | 1075 | 1076 | 1077 | 1078 | 1079 | 1080 | 1081 | 1082 | 1083 | 1084 | 1085 | 1086 | 1087 | 1088 | 1089 | 1090 | 1091 | 1092 | 1093 | 1094 | 1095 | 1096 | 1097 | 1098 | 1099 | 1100 | 1101 | 1102 | 1103 | 1104 | 1105 | 1106 | 1107 | 1108 | 1109 | 1110 | 1111 | 1112 | 1113 | 1114 | 1115 | 1116 | 1117 | 1118 | 1119 | 1120 | 1121 | 1122 | 1123 | 1124 | 1125 | 1126 | 1127 | 1128 | 1129 | 1130 | 1131 | 1132 | 1133 | 1134 | 1135 | 1136 | 1137 | 1138 | 1139 | 1140 | 1141 | 1142 | 1143 | 1144 | 1145 | 1146 | 1147 | 1148 | 1149 | 1150 | 1151 | 1152 | 1153 | 1154 | 1155 | 1156 | 1157 | 1158 | 1159 | 1160 | 1161 | 1162 | 1163 | 1164 | 1165 | 1166 | 1167 | 1168 | 1169 | 1170 | 1171 | 1172 | 1173 | 1174 | 1175 | 1176 | 1177 | 1178 | 1179 | 1180 | 1181 | 1182 | 1183 | 1184 | 1185 | 1186 | 1187 | 1188 | 1189 | 1190 | 1191 | 1192 | 1193 | 1194 | 1195 | 1196 | 1197 | 1198 | 1199 | 1200 | 1201 | 1202 | 1203 | 1204 | 1205 | 1206 | 1207 | 1208 | 1209 | 1210 | 1211 | 1212 | 1213 | 1214 | 1215 | 1216 | 1217 | 1218 | 1219 | 1220 | 1221 | 1222 | 1223 | 1224 | 1225 | 1226 | 1227 | 1228 | 1229 | 1230 | 1231 | 1232 | 1233 | 1234 | 1235 | 1236 | 1237 | 1238 | 1239 | 1240 | 1241 | 1242 | 1243 | 1244 | 1245 | 1246 | 1247 | 1248 | 1249 | 1250 | 1251 | 1252 | 1253 | 1254 | 1255 | 1256 | 1257 | 1258 | 1259 | 1260 | 1261 | 1262 | 1263 | 1264 | 1265 | 1266 | 1267 | 1268 | 1269 | 1270 | 1271 | 1272 | 1273 | 1274 | 1275 | 1276 | 1277 | 1278 | 1279 | 1280 | 1281 | 1282 | 1283 | 1284 | 1285 | 1286 | 1287 | 1288 | 1289 | 1290 | 1291 | 1292 | 1293 | 1294 | 1295 | 1296 | 1297 | 1298 | 1299 | 1300 | 1301 | 1302 | 1303 | 1304 | 1305 | 1306 | 1307 | 1308 | 1309 | 1310 | 1311 | 1312 | 1313 | 1314 | 1315 | 1316 | 1317 | 1318 | 1319 | 1320 | 1321 | 1322 | 1323 | 1324 | 1325 | 1326 | 1327 | 1328 | 1329 | 1330 | 1331 | 1332 | 1333 | 1334 | 1335 | 1336 | 1337 | 1338 | 1339 | 1340 | 1341 | 1342 | 1343 | 1344 | 1345 | 1346 | 1347 | 1348 | 1349 | 1350 | 1351 | 1352 | 1353 | 1354 | 1355 | 1356 | 1357 | 1358 | 1359 | 1360 | 1361 | 1362 | 1363 | 1364 | 1365 | 1366 | 1367 | 1368 | 1369 | 1370 | 1371 | 1372 | 1373 | 1374 | 1375 | 1376 | 1377 | 1378 | 1379 | 1380 | 1381 | 1382 | 1383 | 1384 | 1385 | 1386 | 1387 | 1388 | 1389 | 1390 | 1391 | 1392 | 1393 | 1394 | 1395 | 1396 | 1397 | 1398 | 1399 | 1400 | 1401 | 1402 | 1403 | 1404 | 1405 | 1406 | 1407 | 1408 | 1409 | 1410 | 1411 | 1412 | 1413 | 1414 | 1415 | 1416 | 1417 | 1418 | 1419 | 1420 | 1421 | 1422 | 1423 | 1424 | 1425 | 1426 | 1427 | 1428 | 1429 | 1430 | 1431 | 1432 | 1433 | 1434 | 1435 | 1436 | 1437 | 1438 | 1439 | 1440 | 1441 | 1442 | 1443 | 1444 | 1445 | 1446 | 1447 | 1448 | 1449 | 1450 | 1451 | 1452 | 1453 | 1454 | 1455 | 1456 | 1457 | 1458 | 1459 | 1460 | 1461 | 1462 | 1463 | 1464 | 1465 | 1466 | 1467 | 1468 | 1469 | 1470 | 1471 | 1472 | 1473 | 1474 | 1475 | 1476 | 1477 | 1478 | 1479 | 1480 | 1481 | 1482 | 1483 | 1484 | 1485 | 1486 | 14 |
|---|---|---|---|---|---|---|---|---|----|----|----|----|----|----|----|----|----|----|----|----|----|----|----|----|----|----|----|----|----|----|----|----|----|----|----|----|----|----|----|----|----|----|----|----|----|----|----|----|----|----|----|----|----|----|----|----|----|----|----|----|----|----|----|----|----|----|----|----|----|----|----|----|----|----|----|----|----|----|----|----|----|----|----|----|----|----|----|----|----|----|----|----|----|----|----|----|----|----|-----|-----|-----|-----|-----|-----|-----|-----|-----|-----|-----|-----|-----|-----|-----|-----|-----|-----|-----|-----|-----|-----|-----|-----|-----|-----|-----|-----|-----|-----|-----|-----|-----|-----|-----|-----|-----|-----|-----|-----|-----|-----|-----|-----|-----|-----|-----|-----|-----|-----|-----|-----|-----|-----|-----|-----|-----|-----|-----|-----|-----|-----|-----|-----|-----|-----|-----|-----|-----|-----|-----|-----|-----|-----|-----|-----|-----|-----|-----|-----|-----|-----|-----|-----|-----|-----|-----|-----|-----|-----|-----|-----|-----|-----|-----|-----|-----|-----|-----|-----|-----|-----|-----|-----|-----|-----|-----|-----|-----|-----|-----|-----|-----|-----|-----|-----|-----|-----|-----|-----|-----|-----|-----|-----|-----|-----|-----|-----|-----|-----|-----|-----|-----|-----|-----|-----|-----|-----|-----|-----|-----|-----|-----|-----|-----|-----|-----|-----|-----|-----|-----|-----|-----|-----|-----|-----|-----|-----|-----|-----|-----|-----|-----|-----|-----|-----|-----|-----|-----|-----|-----|-----|-----|-----|-----|-----|-----|-----|-----|-----|-----|-----|-----|-----|-----|-----|-----|-----|-----|-----|-----|-----|-----|-----|-----|-----|-----|-----|-----|-----|-----|-----|-----|-----|-----|-----|-----|-----|-----|-----|-----|-----|-----|-----|-----|-----|-----|-----|-----|-----|-----|-----|-----|-----|-----|-----|-----|-----|-----|-----|-----|-----|-----|-----|-----|-----|-----|-----|-----|-----|-----|-----|-----|-----|-----|-----|-----|-----|-----|-----|-----|-----|-----|-----|-----|-----|-----|-----|-----|-----|-----|-----|-----|-----|-----|-----|-----|-----|-----|-----|-----|-----|-----|-----|-----|-----|-----|-----|-----|-----|-----|-----|-----|-----|-----|-----|-----|-----|-----|-----|-----|-----|-----|-----|-----|-----|-----|-----|-----|-----|-----|-----|-----|-----|-----|-----|-----|-----|-----|-----|-----|-----|-----|-----|-----|-----|-----|-----|-----|-----|-----|-----|-----|-----|-----|-----|-----|-----|-----|-----|-----|-----|-----|-----|-----|-----|-----|-----|-----|-----|-----|-----|-----|-----|-----|-----|-----|-----|-----|-----|-----|-----|-----|-----|-----|-----|-----|-----|-----|-----|-----|-----|-----|-----|-----|-----|-----|-----|-----|-----|-----|-----|-----|-----|-----|-----|-----|-----|-----|-----|-----|-----|-----|-----|-----|-----|-----|-----|-----|-----|-----|-----|-----|-----|-----|-----|-----|-----|-----|-----|-----|-----|-----|-----|-----|-----|-----|-----|-----|-----|-----|-----|-----|-----|-----|-----|-----|-----|-----|-----|-----|-----|-----|-----|-----|-----|-----|-----|-----|-----|-----|-----|-----|-----|-----|-----|-----|-----|-----|-----|-----|-----|-----|-----|-----|-----|-----|-----|-----|-----|-----|-----|-----|-----|-----|-----|-----|-----|-----|-----|-----|-----|-----|-----|-----|-----|-----|-----|-----|-----|-----|-----|-----|-----|-----|-----|-----|-----|-----|-----|-----|-----|-----|-----|-----|-----|-----|-----|-----|-----|-----|-----|-----|-----|-----|-----|-----|-----|-----|-----|-----|-----|-----|-----|-----|-----|-----|-----|-----|-----|-----|-----|-----|-----|-----|-----|-----|-----|-----|-----|-----|-----|-----|-----|-----|-----|-----|-----|-----|-----|-----|-----|-----|-----|-----|-----|-----|-----|-----|-----|-----|-----|-----|-----|-----|-----|-----|-----|-----|-----|-----|-----|-----|-----|-----|-----|-----|-----|-----|-----|-----|-----|-----|-----|-----|-----|-----|-----|-----|-----|-----|-----|-----|-----|-----|-----|-----|-----|-----|-----|-----|-----|-----|-----|-----|-----|-----|-----|-----|-----|-----|-----|-----|-----|-----|-----|-----|-----|-----|-----|-----|-----|-----|-----|-----|-----|-----|-----|-----|-----|-----|-----|-----|-----|-----|-----|-----|-----|-----|-----|-----|-----|-----|-----|-----|-----|-----|-----|-----|-----|-----|-----|-----|-----|-----|-----|-----|-----|-----|-----|-----|-----|-----|-----|-----|-----|-----|-----|-----|-----|-----|-----|-----|-----|-----|-----|-----|-----|-----|-----|-----|-----|-----|-----|-----|-----|-----|-----|-----|-----|-----|-----|-----|-----|-----|-----|-----|-----|-----|-----|-----|-----|-----|-----|-----|-----|-----|-----|-----|-----|-----|-----|-----|-----|-----|-----|-----|-----|-----|-----|-----|-----|-----|-----|-----|-----|-----|-----|-----|-----|-----|-----|-----|-----|-----|-----|-----|-----|-----|-----|-----|-----|-----|-----|-----|-----|-----|-----|-----|-----|-----|-----|-----|-----|-----|-----|-----|-----|-----|-----|-----|-----|-----|-----|-----|-----|-----|-----|-----|-----|-----|-----|-----|-----|-----|-----|-----|-----|-----|-----|-----|-----|-----|-----|-----|-----|-----|-----|-----|-----|-----|-----|-----|-----|-----|-----|-----|-----|-----|-----|-----|-----|-----|-----|-----|-----|-----|-----|-----|-----|-----|-----|-----|-----|-----|-----|-----|-----|-----|-----|-----|-----|-----|-----|-----|-----|-----|-----|-----|-----|-----|-----|-----|-----|-----|-----|-----|-----|-----|-----|-----|-----|-----|-----|-----|-----|-----|-----|-----|-----|-----|-----|-----|-----|-----|-----|-----|-----|-----|-----|-----|-----|-----|-----|-----|-----|-----|-----|-----|-----|-----|-----|-----|-----|-----|-----|-----|-----|-----|-----|-----|-----|-----|-----|-----|-----|-----|-----|-----|-----|-----|-----|-----|-----|-----|-----|-----|-----|-----|-----|-----|-----|-----|-----|-----|-----|-----|-----|-----|-----|-----|-----|-----|-----|-----|-----|-----|-----|-----|-----|------|------|------|------|------|------|------|------|------|------|------|------|------|------|------|------|------|------|------|------|------|------|------|------|------|------|------|------|------|------|------|------|------|------|------|------|------|------|------|------|------|------|------|------|------|------|------|------|------|------|------|------|------|------|------|------|------|------|------|------|------|------|------|------|------|------|------|------|------|------|------|------|------|------|------|------|------|------|------|------|------|------|------|------|------|------|------|------|------|------|------|------|------|------|------|------|------|------|------|------|------|------|------|------|------|------|------|------|------|------|------|------|------|------|------|------|------|------|------|------|------|------|------|------|------|------|------|------|------|------|------|------|------|------|------|------|------|------|------|------|------|------|------|------|------|------|------|------|------|------|------|------|------|------|------|------|------|------|------|------|------|------|------|------|------|------|------|------|------|------|------|------|------|------|------|------|------|------|------|------|------|------|------|------|------|------|------|------|------|------|------|------|------|------|------|------|------|------|------|------|------|------|------|------|------|------|------|------|------|------|------|------|------|------|------|------|------|------|------|------|------|------|------|------|------|------|------|------|------|------|------|------|------|------|------|------|------|------|------|------|------|------|------|------|------|------|------|------|------|------|------|------|------|------|------|------|------|------|------|------|------|------|------|------|------|------|------|------|------|------|------|------|------|------|------|------|------|------|------|------|------|------|------|------|------|------|------|------|------|------|------|------|------|------|------|------|------|------|------|------|------|------|------|------|------|------|------|------|------|------|------|------|------|------|------|------|------|------|------|------|------|------|------|------|------|------|------|------|------|------|------|------|------|------|------|------|------|------|------|------|------|------|------|------|------|------|------|------|------|------|------|------|------|------|------|------|------|------|------|------|------|------|------|------|------|------|------|------|------|------|------|------|------|------|------|------|------|------|------|------|------|------|------|------|------|------|------|------|------|------|------|------|------|------|------|------|------|------|------|------|------|------|------|------|------|------|------|------|------|------|------|------|------|------|------|------|------|------|------|------|------|------|------|------|------|------|------|------|------|------|------|------|------|------|------|------|------|------|------|------|------|------|------|------|------|------|------|------|------|------|------|------|------|------|------|------|------|------|------|------|------|------|------|------|------|------|------|------|------|------|------|------|------|------|------|------|------|------|------|------|------|------|------|------|------|------|------|----|

[illegible]





El-Boghdadly K, et al. *Reg Anesth Pain Med* 2023;0:1–11. doi: 10.1136/rapm-2023-104884

[Back to contents](#)

### LOWER LIMB

[illegible]

|   |   |   |   |   |   |   |   |   |    |    |    |    |    |    |    |    |    |    |    |    |    |    |    |    |    |    |    |    |    |    |    |    |    |    |    |    |    |    |    |    |    |    |    |    |    |    |    |    |    |    |    |    |    |    |    |    |    |    |    |    |    |    |    |    |    |    |    |    |    |    |    |    |    |    |    |    |    |    |    |    |    |    |    |    |    |    |    |    |    |    |    |    |    |    |    |    |    |    |     |     |     |     |     |     |     |     |     |     |     |     |     |     |     |     |     |     |     |     |     |     |     |     |     |     |     |     |     |     |     |     |     |     |     |     |     |     |     |     |     |     |     |     |     |     |     |     |     |     |     |     |     |     |     |     |     |     |     |     |     |     |     |     |     |     |     |     |     |     |     |     |     |     |     |     |     |     |     |     |     |     |     |     |     |     |     |     |     |     |     |     |     |     |     |     |     |     |     |     |     |     |     |     |     |     |     |     |     |     |     |     |     |     |     |     |     |     |     |     |     |     |     |     |     |     |     |     |     |     |     |     |     |     |     |     |     |     |     |     |     |     |     |     |     |     |     |     |     |     |     |     |     |     |     |     |     |     |     |     |     |     |     |     |     |     |     |     |     |     |     |     |     |     |     |     |     |     |     |     |     |     |     |     |     |     |     |     |     |     |     |     |     |     |     |     |     |     |     |     |     |     |     |     |     |     |     |     |     |     |     |     |     |     |     |     |     |     |     |     |     |     |     |     |     |     |     |     |     |     |     |     |     |     |     |     |     |     |     |     |     |     |     |     |     |     |     |     |     |     |     |     |     |     |     |     |     |     |     |     |     |     |     |     |     |     |     |     |     |     |     |     |     |     |     |     |     |     |     |     |     |     |     |     |     |     |     |     |     |     |     |     |     |     |     |     |     |     |     |     |     |     |     |     |     |     |     |     |     |     |     |     |     |     |     |     |     |     |     |     |     |     |     |     |     |     |     |     |     |     |     |     |     |     |     |     |     |     |     |     |     |     |     |     |     |     |     |     |     |     |     |     |     |     |     |     |     |     |     |     |     |     |     |     |     |     |     |     |     |     |     |     |     |     |     |     |     |     |     |     |     |     |     |     |     |     |     |     |     |     |     |     |     |     |     |     |     |     |     |     |     |     |     |     |     |     |     |     |     |     |     |     |     |     |     |     |     |     |     |     |     |     |     |     |     |     |     |     |     |     |     |     |     |     |     |     |     |     |     |     |     |     |     |     |     |     |     |     |     |     |     |     |     |     |     |     |     |     |     |     |     |     |     |     |     |     |     |     |     |     |     |     |     |     |     |     |     |     |     |     |     |     |     |     |     |     |     |     |     |     |     |     |     |     |     |     |     |     |     |     |     |     |     |     |     |     |     |     |     |     |     |     |     |     |     |     |     |     |     |     |     |     |     |     |     |     |     |     |     |     |     |     |     |     |     |     |     |     |     |     |     |     |     |     |     |     |     |     |     |     |     |     |     |     |     |     |     |     |     |     |     |     |     |     |     |     |     |     |     |     |     |     |     |     |     |     |     |     |     |     |     |     |     |     |     |     |     |     |     |     |     |     |     |     |     |     |     |     |     |     |     |     |     |     |     |     |     |     |     |     |     |     |     |     |     |     |     |     |     |     |     |     |     |     |     |     |     |     |     |     |     |     |     |     |     |     |     |     |     |     |     |     |     |     |     |     |     |     |     |     |     |     |     |     |     |     |     |     |     |     |     |     |     |     |     |     |     |     |     |     |     |     |     |     |     |     |     |     |     |     |     |     |     |     |     |     |     |     |     |     |     |     |     |     |     |     |     |     |     |     |     |     |     |     |     |     |     |     |     |     |     |     |     |     |     |     |     |     |     |     |     |     |     |     |     |     |     |     |     |     |     |     |     |     |     |     |     |     |     |     |     |     |     |     |     |     |     |     |     |     |     |     |     |     |     |     |     |     |     |     |     |     |     |     |     |     |     |     |     |     |     |     |     |     |     |     |     |     |     |     |     |     |     |     |     |     |     |     |     |     |     |     |     |     |     |     |     |     |     |     |     |     |     |     |     |     |     |     |     |     |     |     |     |     |     |     |     |     |     |     |     |     |     |     |     |     |     |     |     |     |     |     |     |     |     |     |     |     |     |     |     |     |     |     |     |     |     |     |     |     |     |     |     |     |     |     |     |     |     |     |     |     |     |     |     |     |     |     |     |     |     |     |     |     |     |     |     |     |     |     |     |     |     |     |     |     |     |     |     |     |     |     |     |     |     |     |     |     |     |     |      |      |      |      |      |      |      |      |      |      |      |      |      |      |      |      |      |      |      |      |      |      |      |      |      |      |      |      |      |      |      |      |      |      |      |      |      |      |      |      |      |      |      |      |      |      |      |      |      |      |      |      |      |      |      |      |      |      |      |      |      |      |      |      |      |      |      |      |      |      |      |      |      |      |      |      |      |      |      |      |      |      |      |      |      |      |      |      |      |      |      |      |      |      |      |      |      |      |      |      |      |      |      |      |      |      |      |      |      |      |      |      |      |      |      |      |      |      |      |      |      |      |      |      |      |      |      |      |      |      |      |      |      |      |      |      |      |      |      |      |      |      |      |      |      |      |      |      |      |      |      |      |      |      |      |      |      |      |      |      |      |      |      |      |      |      |      |      |      |      |      |      |      |      |      |      |      |      |      |      |      |      |      |      |      |      |      |      |      |      |      |      |      |      |      |      |      |      |      |      |      |      |      |      |      |      |      |      |      |      |      |      |      |      |      |      |      |      |      |      |      |      |      |      |      |      |      |      |      |      |      |      |      |      |      |      |      |      |      |      |      |      |      |      |      |      |      |      |      |      |      |      |      |      |      |      |      |      |      |      |      |      |      |      |      |      |      |      |      |      |      |      |      |      |      |      |      |      |      |      |      |      |      |      |      |      |      |      |      |      |      |      |      |      |      |      |      |      |      |      |      |      |      |      |      |      |      |      |      |      |      |      |      |      |      |      |      |      |      |      |      |      |      |      |      |      |      |      |      |      |      |      |      |      |      |      |      |      |      |      |      |      |      |      |      |      |      |      |      |      |      |      |      |      |      |      |      |      |      |      |      |      |      |      |      |      |      |      |      |      |      |      |      |      |      |      |      |      |      |      |      |      |      |      |      |      |      |      |      |      |      |      |      |      |      |      |      |      |      |      |      |      |      |      |      |      |      |      |      |      |      |      |      |      |      |      |      |      |      |      |      |      |      |      |      |      |      |      |      |      |      |      |      |      |      |      |      |      |      |      |      |      |      |      |      |      |      |      |      |      |      |      |      |      |      |      |      |      |      |      |      |      |      |      |      |      |      |      |      |      |      |      |      |      |      |      |      |      |      |      |      |      |      |      |      |      |      |    |
|---|---|---|---|---|---|---|---|---|----|----|----|----|----|----|----|----|----|----|----|----|----|----|----|----|----|----|----|----|----|----|----|----|----|----|----|----|----|----|----|----|----|----|----|----|----|----|----|----|----|----|----|----|----|----|----|----|----|----|----|----|----|----|----|----|----|----|----|----|----|----|----|----|----|----|----|----|----|----|----|----|----|----|----|----|----|----|----|----|----|----|----|----|----|----|----|----|----|----|-----|-----|-----|-----|-----|-----|-----|-----|-----|-----|-----|-----|-----|-----|-----|-----|-----|-----|-----|-----|-----|-----|-----|-----|-----|-----|-----|-----|-----|-----|-----|-----|-----|-----|-----|-----|-----|-----|-----|-----|-----|-----|-----|-----|-----|-----|-----|-----|-----|-----|-----|-----|-----|-----|-----|-----|-----|-----|-----|-----|-----|-----|-----|-----|-----|-----|-----|-----|-----|-----|-----|-----|-----|-----|-----|-----|-----|-----|-----|-----|-----|-----|-----|-----|-----|-----|-----|-----|-----|-----|-----|-----|-----|-----|-----|-----|-----|-----|-----|-----|-----|-----|-----|-----|-----|-----|-----|-----|-----|-----|-----|-----|-----|-----|-----|-----|-----|-----|-----|-----|-----|-----|-----|-----|-----|-----|-----|-----|-----|-----|-----|-----|-----|-----|-----|-----|-----|-----|-----|-----|-----|-----|-----|-----|-----|-----|-----|-----|-----|-----|-----|-----|-----|-----|-----|-----|-----|-----|-----|-----|-----|-----|-----|-----|-----|-----|-----|-----|-----|-----|-----|-----|-----|-----|-----|-----|-----|-----|-----|-----|-----|-----|-----|-----|-----|-----|-----|-----|-----|-----|-----|-----|-----|-----|-----|-----|-----|-----|-----|-----|-----|-----|-----|-----|-----|-----|-----|-----|-----|-----|-----|-----|-----|-----|-----|-----|-----|-----|-----|-----|-----|-----|-----|-----|-----|-----|-----|-----|-----|-----|-----|-----|-----|-----|-----|-----|-----|-----|-----|-----|-----|-----|-----|-----|-----|-----|-----|-----|-----|-----|-----|-----|-----|-----|-----|-----|-----|-----|-----|-----|-----|-----|-----|-----|-----|-----|-----|-----|-----|-----|-----|-----|-----|-----|-----|-----|-----|-----|-----|-----|-----|-----|-----|-----|-----|-----|-----|-----|-----|-----|-----|-----|-----|-----|-----|-----|-----|-----|-----|-----|-----|-----|-----|-----|-----|-----|-----|-----|-----|-----|-----|-----|-----|-----|-----|-----|-----|-----|-----|-----|-----|-----|-----|-----|-----|-----|-----|-----|-----|-----|-----|-----|-----|-----|-----|-----|-----|-----|-----|-----|-----|-----|-----|-----|-----|-----|-----|-----|-----|-----|-----|-----|-----|-----|-----|-----|-----|-----|-----|-----|-----|-----|-----|-----|-----|-----|-----|-----|-----|-----|-----|-----|-----|-----|-----|-----|-----|-----|-----|-----|-----|-----|-----|-----|-----|-----|-----|-----|-----|-----|-----|-----|-----|-----|-----|-----|-----|-----|-----|-----|-----|-----|-----|-----|-----|-----|-----|-----|-----|-----|-----|-----|-----|-----|-----|-----|-----|-----|-----|-----|-----|-----|-----|-----|-----|-----|-----|-----|-----|-----|-----|-----|-----|-----|-----|-----|-----|-----|-----|-----|-----|-----|-----|-----|-----|-----|-----|-----|-----|-----|-----|-----|-----|-----|-----|-----|-----|-----|-----|-----|-----|-----|-----|-----|-----|-----|-----|-----|-----|-----|-----|-----|-----|-----|-----|-----|-----|-----|-----|-----|-----|-----|-----|-----|-----|-----|-----|-----|-----|-----|-----|-----|-----|-----|-----|-----|-----|-----|-----|-----|-----|-----|-----|-----|-----|-----|-----|-----|-----|-----|-----|-----|-----|-----|-----|-----|-----|-----|-----|-----|-----|-----|-----|-----|-----|-----|-----|-----|-----|-----|-----|-----|-----|-----|-----|-----|-----|-----|-----|-----|-----|-----|-----|-----|-----|-----|-----|-----|-----|-----|-----|-----|-----|-----|-----|-----|-----|-----|-----|-----|-----|-----|-----|-----|-----|-----|-----|-----|-----|-----|-----|-----|-----|-----|-----|-----|-----|-----|-----|-----|-----|-----|-----|-----|-----|-----|-----|-----|-----|-----|-----|-----|-----|-----|-----|-----|-----|-----|-----|-----|-----|-----|-----|-----|-----|-----|-----|-----|-----|-----|-----|-----|-----|-----|-----|-----|-----|-----|-----|-----|-----|-----|-----|-----|-----|-----|-----|-----|-----|-----|-----|-----|-----|-----|-----|-----|-----|-----|-----|-----|-----|-----|-----|-----|-----|-----|-----|-----|-----|-----|-----|-----|-----|-----|-----|-----|-----|-----|-----|-----|-----|-----|-----|-----|-----|-----|-----|-----|-----|-----|-----|-----|-----|-----|-----|-----|-----|-----|-----|-----|-----|-----|-----|-----|-----|-----|-----|-----|-----|-----|-----|-----|-----|-----|-----|-----|-----|-----|-----|-----|-----|-----|-----|-----|-----|-----|-----|-----|-----|-----|-----|-----|-----|-----|-----|-----|-----|-----|-----|-----|-----|-----|-----|-----|-----|-----|-----|-----|-----|-----|-----|-----|-----|-----|-----|-----|-----|-----|-----|-----|-----|-----|-----|-----|-----|-----|-----|-----|-----|-----|-----|-----|-----|-----|-----|-----|-----|-----|-----|-----|-----|-----|-----|-----|-----|-----|-----|-----|-----|-----|-----|-----|-----|-----|-----|-----|-----|-----|-----|-----|-----|-----|-----|-----|-----|-----|-----|-----|-----|-----|-----|-----|-----|-----|-----|-----|-----|-----|-----|-----|-----|-----|-----|-----|-----|-----|-----|-----|-----|-----|-----|-----|-----|-----|-----|-----|-----|-----|-----|-----|-----|-----|-----|-----|-----|-----|-----|-----|-----|-----|-----|-----|-----|-----|-----|-----|-----|-----|-----|-----|-----|-----|-----|-----|-----|-----|-----|-----|-----|-----|-----|-----|-----|-----|-----|-----|-----|-----|-----|-----|-----|-----|-----|-----|-----|-----|-----|-----|-----|-----|-----|-----|-----|-----|-----|-----|-----|-----|-----|-----|-----|-----|-----|-----|-----|-----|-----|-----|-----|-----|-----|-----|-----|-----|-----|-----|-----|-----|-----|-----|------|------|------|------|------|------|------|------|------|------|------|------|------|------|------|------|------|------|------|------|------|------|------|------|------|------|------|------|------|------|------|------|------|------|------|------|------|------|------|------|------|------|------|------|------|------|------|------|------|------|------|------|------|------|------|------|------|------|------|------|------|------|------|------|------|------|------|------|------|------|------|------|------|------|------|------|------|------|------|------|------|------|------|------|------|------|------|------|------|------|------|------|------|------|------|------|------|------|------|------|------|------|------|------|------|------|------|------|------|------|------|------|------|------|------|------|------|------|------|------|------|------|------|------|------|------|------|------|------|------|------|------|------|------|------|------|------|------|------|------|------|------|------|------|------|------|------|------|------|------|------|------|------|------|------|------|------|------|------|------|------|------|------|------|------|------|------|------|------|------|------|------|------|------|------|------|------|------|------|------|------|------|------|------|------|------|------|------|------|------|------|------|------|------|------|------|------|------|------|------|------|------|------|------|------|------|------|------|------|------|------|------|------|------|------|------|------|------|------|------|------|------|------|------|------|------|------|------|------|------|------|------|------|------|------|------|------|------|------|------|------|------|------|------|------|------|------|------|------|------|------|------|------|------|------|------|------|------|------|------|------|------|------|------|------|------|------|------|------|------|------|------|------|------|------|------|------|------|------|------|------|------|------|------|------|------|------|------|------|------|------|------|------|------|------|------|------|------|------|------|------|------|------|------|------|------|------|------|------|------|------|------|------|------|------|------|------|------|------|------|------|------|------|------|------|------|------|------|------|------|------|------|------|------|------|------|------|------|------|------|------|------|------|------|------|------|------|------|------|------|------|------|------|------|------|------|------|------|------|------|------|------|------|------|------|------|------|------|------|------|------|------|------|------|------|------|------|------|------|------|------|------|------|------|------|------|------|------|------|------|------|------|------|------|------|------|------|------|------|------|------|------|------|------|------|------|------|------|------|------|------|------|------|------|------|------|------|------|------|------|------|------|------|------|------|------|------|------|------|------|------|------|------|------|------|------|------|------|------|------|------|------|------|------|------|------|------|------|------|------|------|------|------|------|------|------|------|------|------|------|------|------|------|------|------|------|------|------|------|------|------|------|------|------|------|------|------|------|------|------|------|------|------|------|------|------|------|----|
| 1 | 2 | 3 | 4 | 5 | 6 | 7 | 8 | 9 | 10 | 11 | 12 | 13 | 14 | 15 | 16 | 17 | 18 | 19 | 20 | 21 | 22 | 23 | 24 | 25 | 26 | 27 | 28 | 29 | 30 | 31 | 32 | 33 | 34 | 35 | 36 | 37 | 38 | 39 | 40 | 41 | 42 | 43 | 44 | 45 | 46 | 47 | 48 | 49 | 50 | 51 | 52 | 53 | 54 | 55 | 56 | 57 | 58 | 59 | 60 | 61 | 62 | 63 | 64 | 65 | 66 | 67 | 68 | 69 | 70 | 71 | 72 | 73 | 74 | 75 | 76 | 77 | 78 | 79 | 80 | 81 | 82 | 83 | 84 | 85 | 86 | 87 | 88 | 89 | 90 | 91 | 92 | 93 | 94 | 95 | 96 | 97 | 98 | 99 | 100 | 101 | 102 | 103 | 104 | 105 | 106 | 107 | 108 | 109 | 110 | 111 | 112 | 113 | 114 | 115 | 116 | 117 | 118 | 119 | 120 | 121 | 122 | 123 | 124 | 125 | 126 | 127 | 128 | 129 | 130 | 131 | 132 | 133 | 134 | 135 | 136 | 137 | 138 | 139 | 140 | 141 | 142 | 143 | 144 | 145 | 146 | 147 | 148 | 149 | 150 | 151 | 152 | 153 | 154 | 155 | 156 | 157 | 158 | 159 | 160 | 161 | 162 | 163 | 164 | 165 | 166 | 167 | 168 | 169 | 170 | 171 | 172 | 173 | 174 | 175 | 176 | 177 | 178 | 179 | 180 | 181 | 182 | 183 | 184 | 185 | 186 | 187 | 188 | 189 | 190 | 191 | 192 | 193 | 194 | 195 | 196 | 197 | 198 | 199 | 200 | 201 | 202 | 203 | 204 | 205 | 206 | 207 | 208 | 209 | 210 | 211 | 212 | 213 | 214 | 215 | 216 | 217 | 218 | 219 | 220 | 221 | 222 | 223 | 224 | 225 | 226 | 227 | 228 | 229 | 230 | 231 | 232 | 233 | 234 | 235 | 236 | 237 | 238 | 239 | 240 | 241 | 242 | 243 | 244 | 245 | 246 | 247 | 248 | 249 | 250 | 251 | 252 | 253 | 254 | 255 | 256 | 257 | 258 | 259 | 260 | 261 | 262 | 263 | 264 | 265 | 266 | 267 | 268 | 269 | 270 | 271 | 272 | 273 | 274 | 275 | 276 | 277 | 278 | 279 | 280 | 281 | 282 | 283 | 284 | 285 | 286 | 287 | 288 | 289 | 290 | 291 | 292 | 293 | 294 | 295 | 296 | 297 | 298 | 299 | 300 | 301 | 302 | 303 | 304 | 305 | 306 | 307 | 308 | 309 | 310 | 311 | 312 | 313 | 314 | 315 | 316 | 317 | 318 | 319 | 320 | 321 | 322 | 323 | 324 | 325 | 326 | 327 | 328 | 329 | 330 | 331 | 332 | 333 | 334 | 335 | 336 | 337 | 338 | 339 | 340 | 341 | 342 | 343 | 344 | 345 | 346 | 347 | 348 | 349 | 350 | 351 | 352 | 353 | 354 | 355 | 356 | 357 | 358 | 359 | 360 | 361 | 362 | 363 | 364 | 365 | 366 | 367 | 368 | 369 | 370 | 371 | 372 | 373 | 374 | 375 | 376 | 377 | 378 | 379 | 380 | 381 | 382 | 383 | 384 | 385 | 386 | 387 | 388 | 389 | 390 | 391 | 392 | 393 | 394 | 395 | 396 | 397 | 398 | 399 | 400 | 401 | 402 | 403 | 404 | 405 | 406 | 407 | 408 | 409 | 410 | 411 | 412 | 413 | 414 | 415 | 416 | 417 | 418 | 419 | 420 | 421 | 422 | 423 | 424 | 425 | 426 | 427 | 428 | 429 | 430 | 431 | 432 | 433 | 434 | 435 | 436 | 437 | 438 | 439 | 440 | 441 | 442 | 443 | 444 | 445 | 446 | 447 | 448 | 449 | 450 | 451 | 452 | 453 | 454 | 455 | 456 | 457 | 458 | 459 | 460 | 461 | 462 | 463 | 464 | 465 | 466 | 467 | 468 | 469 | 470 | 471 | 472 | 473 | 474 | 475 | 476 | 477 | 478 | 479 | 480 | 481 | 482 | 483 | 484 | 485 | 486 | 487 | 488 | 489 | 490 | 491 | 492 | 493 | 494 | 495 | 496 | 497 | 498 | 499 | 500 | 501 | 502 | 503 | 504 | 505 | 506 | 507 | 508 | 509 | 510 | 511 | 512 | 513 | 514 | 515 | 516 | 517 | 518 | 519 | 520 | 521 | 522 | 523 | 524 | 525 | 526 | 527 | 528 | 529 | 530 | 531 | 532 | 533 | 534 | 535 | 536 | 537 | 538 | 539 | 540 | 541 | 542 | 543 | 544 | 545 | 546 | 547 | 548 | 549 | 550 | 551 | 552 | 553 | 554 | 555 | 556 | 557 | 558 | 559 | 560 | 561 | 562 | 563 | 564 | 565 | 566 | 567 | 568 | 569 | 570 | 571 | 572 | 573 | 574 | 575 | 576 | 577 | 578 | 579 | 580 | 581 | 582 | 583 | 584 | 585 | 586 | 587 | 588 | 589 | 590 | 591 | 592 | 593 | 594 | 595 | 596 | 597 | 598 | 599 | 600 | 601 | 602 | 603 | 604 | 605 | 606 | 607 | 608 | 609 | 610 | 611 | 612 | 613 | 614 | 615 | 616 | 617 | 618 | 619 | 620 | 621 | 622 | 623 | 624 | 625 | 626 | 627 | 628 | 629 | 630 | 631 | 632 | 633 | 634 | 635 | 636 | 637 | 638 | 639 | 640 | 641 | 642 | 643 | 644 | 645 | 646 | 647 | 648 | 649 | 650 | 651 | 652 | 653 | 654 | 655 | 656 | 657 | 658 | 659 | 660 | 661 | 662 | 663 | 664 | 665 | 666 | 667 | 668 | 669 | 670 | 671 | 672 | 673 | 674 | 675 | 676 | 677 | 678 | 679 | 680 | 681 | 682 | 683 | 684 | 685 | 686 | 687 | 688 | 689 | 690 | 691 | 692 | 693 | 694 | 695 | 696 | 697 | 698 | 699 | 700 | 701 | 702 | 703 | 704 | 705 | 706 | 707 | 708 | 709 | 710 | 711 | 712 | 713 | 714 | 715 | 716 | 717 | 718 | 719 | 720 | 721 | 722 | 723 | 724 | 725 | 726 | 727 | 728 | 729 | 730 | 731 | 732 | 733 | 734 | 735 | 736 | 737 | 738 | 739 | 740 | 741 | 742 | 743 | 744 | 745 | 746 | 747 | 748 | 749 | 750 | 751 | 752 | 753 | 754 | 755 | 756 | 757 | 758 | 759 | 760 | 761 | 762 | 763 | 764 | 765 | 766 | 767 | 768 | 769 | 770 | 771 | 772 | 773 | 774 | 775 | 776 | 777 | 778 | 779 | 780 | 781 | 782 | 783 | 784 | 785 | 786 | 787 | 788 | 789 | 790 | 791 | 792 | 793 | 794 | 795 | 796 | 797 | 798 | 799 | 800 | 801 | 802 | 803 | 804 | 805 | 806 | 807 | 808 | 809 | 810 | 811 | 812 | 813 | 814 | 815 | 816 | 817 | 818 | 819 | 820 | 821 | 822 | 823 | 824 | 825 | 826 | 827 | 828 | 829 | 830 | 831 | 832 | 833 | 834 | 835 | 836 | 837 | 838 | 839 | 840 | 841 | 842 | 843 | 844 | 845 | 846 | 847 | 848 | 849 | 850 | 851 | 852 | 853 | 854 | 855 | 856 | 857 | 858 | 859 | 860 | 861 | 862 | 863 | 864 | 865 | 866 | 867 | 868 | 869 | 870 | 871 | 872 | 873 | 874 | 875 | 876 | 877 | 878 | 879 | 880 | 881 | 882 | 883 | 884 | 885 | 886 | 887 | 888 | 889 | 890 | 891 | 892 | 893 | 894 | 895 | 896 | 897 | 898 | 899 | 900 | 901 | 902 | 903 | 904 | 905 | 906 | 907 | 908 | 909 | 910 | 911 | 912 | 913 | 914 | 915 | 916 | 917 | 918 | 919 | 920 | 921 | 922 | 923 | 924 | 925 | 926 | 927 | 928 | 929 | 930 | 931 | 932 | 933 | 934 | 935 | 936 | 937 | 938 | 939 | 940 | 941 | 942 | 943 | 944 | 945 | 946 | 947 | 948 | 949 | 950 | 951 | 952 | 953 | 954 | 955 | 956 | 957 | 958 | 959 | 960 | 961 | 962 | 963 | 964 | 965 | 966 | 967 | 968 | 969 | 970 | 971 | 972 | 973 | 974 | 975 | 976 | 977 | 978 | 979 | 980 | 981 | 982 | 983 | 984 | 985 | 986 | 987 | 988 | 989 | 990 | 991 | 992 | 993 | 994 | 995 | 996 | 997 | 998 | 999 | 1000 | 1001 | 1002 | 1003 | 1004 | 1005 | 1006 | 1007 | 1008 | 1009 | 1010 | 1011 | 1012 | 1013 | 1014 | 1015 | 1016 | 1017 | 1018 | 1019 | 1020 | 1021 | 1022 | 1023 | 1024 | 1025 | 1026 | 1027 | 1028 | 1029 | 1030 | 1031 | 1032 | 1033 | 1034 | 1035 | 1036 | 1037 | 1038 | 1039 | 1040 | 1041 | 1042 | 1043 | 1044 | 1045 | 1046 | 1047 | 1048 | 1049 | 1050 | 1051 | 1052 | 1053 | 1054 | 1055 | 1056 | 1057 | 1058 | 1059 | 1060 | 1061 | 1062 | 1063 | 1064 | 1065 | 1066 | 1067 | 1068 | 1069 | 1070 | 1071 | 1072 | 1073 | 1074 | 1075 | 1076 | 1077 | 1078 | 1079 | 1080 | 1081 | 1082 | 1083 | 1084 | 1085 | 1086 | 1087 | 1088 | 1089 | 1090 | 1091 | 1092 | 1093 | 1094 | 1095 | 1096 | 1097 | 1098 | 1099 | 1100 | 1101 | 1102 | 1103 | 1104 | 1105 | 1106 | 1107 | 1108 | 1109 | 1110 | 1111 | 1112 | 1113 | 1114 | 1115 | 1116 | 1117 | 1118 | 1119 | 1120 | 1121 | 1122 | 1123 | 1124 | 1125 | 1126 | 1127 | 1128 | 1129 | 1130 | 1131 | 1132 | 1133 | 1134 | 1135 | 1136 | 1137 | 1138 | 1139 | 1140 | 1141 | 1142 | 1143 | 1144 | 1145 | 1146 | 1147 | 1148 | 1149 | 1150 | 1151 | 1152 | 1153 | 1154 | 1155 | 1156 | 1157 | 1158 | 1159 | 1160 | 1161 | 1162 | 1163 | 1164 | 1165 | 1166 | 1167 | 1168 | 1169 | 1170 | 1171 | 1172 | 1173 | 1174 | 1175 | 1176 | 1177 | 1178 | 1179 | 1180 | 1181 | 1182 | 1183 | 1184 | 1185 | 1186 | 1187 | 1188 | 1189 | 1190 | 1191 | 1192 | 1193 | 1194 | 1195 | 1196 | 1197 | 1198 | 1199 | 1200 | 1201 | 1202 | 1203 | 1204 | 1205 | 1206 | 1207 | 1208 | 1209 | 1210 | 1211 | 1212 | 1213 | 1214 | 1215 | 1216 | 1217 | 1218 | 1219 | 1220 | 1221 | 1222 | 1223 | 1224 | 1225 | 1226 | 1227 | 1228 | 1229 | 1230 | 1231 | 1232 | 1233 | 1234 | 1235 | 1236 | 1237 | 1238 | 1239 | 1240 | 1241 | 1242 | 1243 | 1244 | 1245 | 1246 | 1247 | 1248 | 1249 | 1250 | 1251 | 1252 | 1253 | 1254 | 1255 | 1256 | 1257 | 1258 | 1259 | 1260 | 1261 | 1262 | 1263 | 1264 | 1265 | 1266 | 1267 | 1268 | 1269 | 1270 | 1271 | 1272 | 1273 | 1274 | 1275 | 1276 | 1277 | 1278 | 1279 | 1280 | 1281 | 1282 | 1283 | 1284 | 1285 | 1286 | 1287 | 1288 | 1289 | 1290 | 1291 | 1292 | 1293 | 1294 | 1295 | 1296 | 1297 | 1298 | 1299 | 1300 | 1301 | 1302 | 1303 | 1304 | 1305 | 1306 | 1307 | 1308 | 1309 | 1310 | 1311 | 1312 | 1313 | 1314 | 1315 | 1316 | 1317 | 1318 | 1319 | 1320 | 1321 | 1322 | 1323 | 1324 | 1325 | 1326 | 1327 | 1328 | 1329 | 1330 | 1331 | 1332 | 1333 | 1334 | 1335 | 1336 | 1337 | 1338 | 1339 | 1340 | 1341 | 1342 | 1343 | 1344 | 1345 | 1346 | 1347 | 1348 | 1349 | 1350 | 1351 | 1352 | 1353 | 1354 | 1355 | 1356 | 1357 | 1358 | 1359 | 1360 | 1361 | 1362 | 1363 | 1364 | 1365 | 1366 | 1367 | 1368 | 1369 | 1370 | 1371 | 1372 | 1373 | 1374 | 1375 | 1376 | 1377 | 1378 | 1379 | 1380 | 1381 | 1382 | 1383 | 1384 | 1385 | 1386 | 1387 | 1388 | 1389 | 1390 | 1391 | 1392 | 1393 | 1394 | 1395 | 1396 | 1397 | 1398 | 1399 | 1400 | 1401 | 1402 | 1403 | 1404 | 1405 | 1406 | 1407 | 1408 | 1409 | 1410 | 1411 | 1412 | 1413 | 1414 | 1415 | 1416 | 1417 | 1418 | 1419 | 1420 | 1421 | 1422 | 1423 | 1424 | 1425 | 1426 | 1427 | 1428 | 1429 | 1430 | 1431 | 1432 | 1433 | 1434 | 1435 | 1436 | 1437 | 1438 | 1439 | 1440 | 1441 | 1442 | 1443 | 1444 | 1445 | 1446 | 1447 | 1448 | 1449 | 1450 | 1451 | 1452 | 1453 | 1454 | 1455 | 1456 | 1457 | 1458 | 1459 | 1460 | 1461 | 1462 | 1463 | 1464 | 1465 | 1466 | 1467 | 1468 | 1469 | 1470 | 1471 | 1472 | 1473 | 1474 | 1475 | 1476 | 1477 | 1478 | 1479 | 1480 | 1481 | 1482 | 1483 | 1484 | 1485 | 1486 | 14 |
|---|---|---|---|---|---|---|---|---|----|----|----|----|----|----|----|----|----|----|----|----|----|----|----|----|----|----|----|----|----|----|----|----|----|----|----|----|----|----|----|----|----|----|----|----|----|----|----|----|----|----|----|----|----|----|----|----|----|----|----|----|----|----|----|----|----|----|----|----|----|----|----|----|----|----|----|----|----|----|----|----|----|----|----|----|----|----|----|----|----|----|----|----|----|----|----|----|----|----|-----|-----|-----|-----|-----|-----|-----|-----|-----|-----|-----|-----|-----|-----|-----|-----|-----|-----|-----|-----|-----|-----|-----|-----|-----|-----|-----|-----|-----|-----|-----|-----|-----|-----|-----|-----|-----|-----|-----|-----|-----|-----|-----|-----|-----|-----|-----|-----|-----|-----|-----|-----|-----|-----|-----|-----|-----|-----|-----|-----|-----|-----|-----|-----|-----|-----|-----|-----|-----|-----|-----|-----|-----|-----|-----|-----|-----|-----|-----|-----|-----|-----|-----|-----|-----|-----|-----|-----|-----|-----|-----|-----|-----|-----|-----|-----|-----|-----|-----|-----|-----|-----|-----|-----|-----|-----|-----|-----|-----|-----|-----|-----|-----|-----|-----|-----|-----|-----|-----|-----|-----|-----|-----|-----|-----|-----|-----|-----|-----|-----|-----|-----|-----|-----|-----|-----|-----|-----|-----|-----|-----|-----|-----|-----|-----|-----|-----|-----|-----|-----|-----|-----|-----|-----|-----|-----|-----|-----|-----|-----|-----|-----|-----|-----|-----|-----|-----|-----|-----|-----|-----|-----|-----|-----|-----|-----|-----|-----|-----|-----|-----|-----|-----|-----|-----|-----|-----|-----|-----|-----|-----|-----|-----|-----|-----|-----|-----|-----|-----|-----|-----|-----|-----|-----|-----|-----|-----|-----|-----|-----|-----|-----|-----|-----|-----|-----|-----|-----|-----|-----|-----|-----|-----|-----|-----|-----|-----|-----|-----|-----|-----|-----|-----|-----|-----|-----|-----|-----|-----|-----|-----|-----|-----|-----|-----|-----|-----|-----|-----|-----|-----|-----|-----|-----|-----|-----|-----|-----|-----|-----|-----|-----|-----|-----|-----|-----|-----|-----|-----|-----|-----|-----|-----|-----|-----|-----|-----|-----|-----|-----|-----|-----|-----|-----|-----|-----|-----|-----|-----|-----|-----|-----|-----|-----|-----|-----|-----|-----|-----|-----|-----|-----|-----|-----|-----|-----|-----|-----|-----|-----|-----|-----|-----|-----|-----|-----|-----|-----|-----|-----|-----|-----|-----|-----|-----|-----|-----|-----|-----|-----|-----|-----|-----|-----|-----|-----|-----|-----|-----|-----|-----|-----|-----|-----|-----|-----|-----|-----|-----|-----|-----|-----|-----|-----|-----|-----|-----|-----|-----|-----|-----|-----|-----|-----|-----|-----|-----|-----|-----|-----|-----|-----|-----|-----|-----|-----|-----|-----|-----|-----|-----|-----|-----|-----|-----|-----|-----|-----|-----|-----|-----|-----|-----|-----|-----|-----|-----|-----|-----|-----|-----|-----|-----|-----|-----|-----|-----|-----|-----|-----|-----|-----|-----|-----|-----|-----|-----|-----|-----|-----|-----|-----|-----|-----|-----|-----|-----|-----|-----|-----|-----|-----|-----|-----|-----|-----|-----|-----|-----|-----|-----|-----|-----|-----|-----|-----|-----|-----|-----|-----|-----|-----|-----|-----|-----|-----|-----|-----|-----|-----|-----|-----|-----|-----|-----|-----|-----|-----|-----|-----|-----|-----|-----|-----|-----|-----|-----|-----|-----|-----|-----|-----|-----|-----|-----|-----|-----|-----|-----|-----|-----|-----|-----|-----|-----|-----|-----|-----|-----|-----|-----|-----|-----|-----|-----|-----|-----|-----|-----|-----|-----|-----|-----|-----|-----|-----|-----|-----|-----|-----|-----|-----|-----|-----|-----|-----|-----|-----|-----|-----|-----|-----|-----|-----|-----|-----|-----|-----|-----|-----|-----|-----|-----|-----|-----|-----|-----|-----|-----|-----|-----|-----|-----|-----|-----|-----|-----|-----|-----|-----|-----|-----|-----|-----|-----|-----|-----|-----|-----|-----|-----|-----|-----|-----|-----|-----|-----|-----|-----|-----|-----|-----|-----|-----|-----|-----|-----|-----|-----|-----|-----|-----|-----|-----|-----|-----|-----|-----|-----|-----|-----|-----|-----|-----|-----|-----|-----|-----|-----|-----|-----|-----|-----|-----|-----|-----|-----|-----|-----|-----|-----|-----|-----|-----|-----|-----|-----|-----|-----|-----|-----|-----|-----|-----|-----|-----|-----|-----|-----|-----|-----|-----|-----|-----|-----|-----|-----|-----|-----|-----|-----|-----|-----|-----|-----|-----|-----|-----|-----|-----|-----|-----|-----|-----|-----|-----|-----|-----|-----|-----|-----|-----|-----|-----|-----|-----|-----|-----|-----|-----|-----|-----|-----|-----|-----|-----|-----|-----|-----|-----|-----|-----|-----|-----|-----|-----|-----|-----|-----|-----|-----|-----|-----|-----|-----|-----|-----|-----|-----|-----|-----|-----|-----|-----|-----|-----|-----|-----|-----|-----|-----|-----|-----|-----|-----|-----|-----|-----|-----|-----|-----|-----|-----|-----|-----|-----|-----|-----|-----|-----|-----|-----|-----|-----|-----|-----|-----|-----|-----|-----|-----|-----|-----|-----|-----|-----|-----|-----|-----|-----|-----|-----|-----|-----|-----|-----|-----|-----|-----|-----|-----|-----|-----|-----|-----|-----|-----|-----|-----|-----|-----|-----|-----|-----|-----|-----|-----|-----|-----|-----|-----|-----|-----|-----|-----|-----|-----|-----|-----|-----|-----|-----|-----|-----|-----|-----|-----|-----|-----|-----|-----|-----|-----|-----|-----|-----|-----|-----|-----|-----|-----|-----|-----|-----|-----|-----|-----|-----|-----|-----|-----|-----|-----|-----|-----|-----|-----|-----|-----|-----|-----|-----|-----|-----|-----|-----|-----|-----|-----|-----|-----|-----|-----|-----|-----|-----|-----|-----|-----|-----|-----|-----|-----|-----|-----|-----|-----|-----|-----|-----|-----|-----|-----|-----|-----|-----|-----|-----|-----|-----|-----|-----|-----|-----|-----|-----|-----|-----|-----|-----|-----|-----|-----|-----|-----|-----|-----|-----|-----|-----|------|------|------|------|------|------|------|------|------|------|------|------|------|------|------|------|------|------|------|------|------|------|------|------|------|------|------|------|------|------|------|------|------|------|------|------|------|------|------|------|------|------|------|------|------|------|------|------|------|------|------|------|------|------|------|------|------|------|------|------|------|------|------|------|------|------|------|------|------|------|------|------|------|------|------|------|------|------|------|------|------|------|------|------|------|------|------|------|------|------|------|------|------|------|------|------|------|------|------|------|------|------|------|------|------|------|------|------|------|------|------|------|------|------|------|------|------|------|------|------|------|------|------|------|------|------|------|------|------|------|------|------|------|------|------|------|------|------|------|------|------|------|------|------|------|------|------|------|------|------|------|------|------|------|------|------|------|------|------|------|------|------|------|------|------|------|------|------|------|------|------|------|------|------|------|------|------|------|------|------|------|------|------|------|------|------|------|------|------|------|------|------|------|------|------|------|------|------|------|------|------|------|------|------|------|------|------|------|------|------|------|------|------|------|------|------|------|------|------|------|------|------|------|------|------|------|------|------|------|------|------|------|------|------|------|------|------|------|------|------|------|------|------|------|------|------|------|------|------|------|------|------|------|------|------|------|------|------|------|------|------|------|------|------|------|------|------|------|------|------|------|------|------|------|------|------|------|------|------|------|------|------|------|------|------|------|------|------|------|------|------|------|------|------|------|------|------|------|------|------|------|------|------|------|------|------|------|------|------|------|------|------|------|------|------|------|------|------|------|------|------|------|------|------|------|------|------|------|------|------|------|------|------|------|------|------|------|------|------|------|------|------|------|------|------|------|------|------|------|------|------|------|------|------|------|------|------|------|------|------|------|------|------|------|------|------|------|------|------|------|------|------|------|------|------|------|------|------|------|------|------|------|------|------|------|------|------|------|------|------|------|------|------|------|------|------|------|------|------|------|------|------|------|------|------|------|------|------|------|------|------|------|------|------|------|------|------|------|------|------|------|------|------|------|------|------|------|------|------|------|------|------|------|------|------|------|------|------|------|------|------|------|------|------|------|------|------|------|------|------|------|------|------|------|------|------|------|------|------|------|------|------|------|------|------|------|------|------|------|------|------|------|------|------|------|------|------|------|------|------|------|------|------|------|------|------|------|----|

|   |   |   |   |   |   |   |   |   |    |    |    |    |    |    |    |    |    |    |    |    |    |    |    |    |    |    |    |    |    |    |    |    |    |    |    |    |    |    |    |    |    |    |    |    |    |    |    |    |    |    |    |    |    |    |    |    |    |    |    |    |    |    |    |    |    |    |    |    |    |    |    |    |    |    |    |    |    |    |    |    |    |    |    |    |    |    |    |    |    |    |    |    |    |    |    |    |    |    |     |     |     |     |     |     |     |     |     |     |     |     |     |     |     |     |     |     |     |     |     |     |     |     |     |     |     |     |     |     |     |     |     |     |     |     |     |     |     |     |     |     |     |     |     |     |     |     |     |     |     |     |     |     |     |     |     |     |     |     |     |     |     |     |     |     |     |     |     |     |     |     |     |     |     |     |     |     |     |     |     |     |     |     |     |     |     |     |     |     |     |     |     |     |     |     |     |     |     |     |     |     |     |     |     |     |     |     |     |     |     |     |     |     |     |     |     |     |     |     |     |     |     |     |     |     |     |     |     |     |     |     |     |     |     |     |     |     |     |     |     |     |     |     |     |     |     |     |     |     |     |     |     |     |     |     |     |     |     |     |     |     |     |     |     |     |     |     |     |     |     |     |     |     |     |     |     |     |     |     |     |     |     |     |     |     |     |     |     |     |     |     |     |     |     |     |     |     |     |     |     |     |     |     |     |     |     |     |     |     |     |     |     |     |     |     |     |     |     |     |     |     |     |     |     |     |     |     |     |     |     |     |     |     |     |     |     |     |     |     |     |     |     |     |     |     |     |     |     |     |     |     |     |     |     |     |     |     |     |     |     |     |     |     |     |     |     |     |     |     |     |     |     |     |     |     |     |     |     |     |     |     |     |     |     |     |     |     |     |     |     |     |     |     |     |     |     |     |     |     |     |     |     |     |     |     |     |     |     |     |     |     |     |     |     |     |     |     |     |     |     |     |     |     |     |     |     |     |     |     |     |     |     |     |     |     |     |     |     |     |     |     |     |     |     |     |     |     |     |     |     |     |     |     |     |     |     |     |     |     |     |     |     |     |     |     |     |     |     |     |     |     |     |     |     |     |     |     |     |     |     |     |     |     |     |     |     |     |     |     |     |     |     |     |     |     |     |     |     |     |     |     |     |     |     |     |     |     |     |     |     |     |     |     |     |     |     |     |     |     |     |     |     |     |     |     |     |     |     |     |     |     |     |     |     |     |     |     |     |     |     |     |     |     |     |     |     |     |     |     |     |     |     |     |     |     |     |     |     |     |     |     |     |     |     |     |     |     |     |     |     |     |     |     |     |     |     |     |     |     |     |     |     |     |     |     |     |     |     |     |     |     |     |     |     |     |     |     |     |     |     |     |     |     |     |     |     |     |     |     |     |     |     |     |     |     |     |     |     |     |     |     |     |     |     |     |     |     |     |     |     |     |     |     |     |     |     |     |     |     |     |     |     |     |     |     |     |     |     |     |     |     |     |     |     |     |     |     |     |     |     |     |     |     |     |     |     |     |     |     |     |     |     |     |     |     |     |     |     |     |     |     |     |     |     |     |     |     |     |     |     |     |     |     |     |     |     |     |     |     |     |     |     |     |     |     |     |     |     |     |     |     |     |     |     |     |     |     |     |     |     |     |     |     |     |     |     |     |     |     |     |     |     |     |     |     |     |     |     |     |     |     |     |     |     |     |     |     |     |     |     |     |     |     |     |     |     |     |     |     |     |     |     |     |     |     |     |     |     |     |     |     |     |     |     |     |     |     |     |     |     |     |     |     |     |     |     |     |     |     |     |     |     |     |     |     |     |     |     |     |     |     |     |     |     |     |     |     |     |     |     |     |     |     |     |     |     |     |     |     |     |     |     |     |     |     |     |     |     |     |     |     |     |     |     |     |     |     |     |     |     |     |     |     |     |     |     |     |     |     |     |     |     |     |     |     |     |     |     |     |     |     |     |     |     |     |     |     |     |     |     |     |     |     |     |     |     |     |     |     |     |     |     |     |     |     |     |     |     |     |     |     |     |     |     |     |     |     |     |     |     |     |     |     |     |     |     |     |     |     |     |     |     |     |     |     |     |     |     |     |     |     |     |     |     |     |     |     |     |     |     |     |     |     |     |     |     |     |     |     |     |     |     |     |     |     |     |     |     |     |     |     |     |     |     |     |     |     |     |     |     |     |     |     |     |     |     |     |     |     |     |     |     |     |     |     |     |     |     |     |     |     |     |     |     |     |     |     |     |     |     |     |     |     |     |     |     |     |     |     |      |
|---|---|---|---|---|---|---|---|---|----|----|----|----|----|----|----|----|----|----|----|----|----|----|----|----|----|----|----|----|----|----|----|----|----|----|----|----|----|----|----|----|----|----|----|----|----|----|----|----|----|----|----|----|----|----|----|----|----|----|----|----|----|----|----|----|----|----|----|----|----|----|----|----|----|----|----|----|----|----|----|----|----|----|----|----|----|----|----|----|----|----|----|----|----|----|----|----|----|----|-----|-----|-----|-----|-----|-----|-----|-----|-----|-----|-----|-----|-----|-----|-----|-----|-----|-----|-----|-----|-----|-----|-----|-----|-----|-----|-----|-----|-----|-----|-----|-----|-----|-----|-----|-----|-----|-----|-----|-----|-----|-----|-----|-----|-----|-----|-----|-----|-----|-----|-----|-----|-----|-----|-----|-----|-----|-----|-----|-----|-----|-----|-----|-----|-----|-----|-----|-----|-----|-----|-----|-----|-----|-----|-----|-----|-----|-----|-----|-----|-----|-----|-----|-----|-----|-----|-----|-----|-----|-----|-----|-----|-----|-----|-----|-----|-----|-----|-----|-----|-----|-----|-----|-----|-----|-----|-----|-----|-----|-----|-----|-----|-----|-----|-----|-----|-----|-----|-----|-----|-----|-----|-----|-----|-----|-----|-----|-----|-----|-----|-----|-----|-----|-----|-----|-----|-----|-----|-----|-----|-----|-----|-----|-----|-----|-----|-----|-----|-----|-----|-----|-----|-----|-----|-----|-----|-----|-----|-----|-----|-----|-----|-----|-----|-----|-----|-----|-----|-----|-----|-----|-----|-----|-----|-----|-----|-----|-----|-----|-----|-----|-----|-----|-----|-----|-----|-----|-----|-----|-----|-----|-----|-----|-----|-----|-----|-----|-----|-----|-----|-----|-----|-----|-----|-----|-----|-----|-----|-----|-----|-----|-----|-----|-----|-----|-----|-----|-----|-----|-----|-----|-----|-----|-----|-----|-----|-----|-----|-----|-----|-----|-----|-----|-----|-----|-----|-----|-----|-----|-----|-----|-----|-----|-----|-----|-----|-----|-----|-----|-----|-----|-----|-----|-----|-----|-----|-----|-----|-----|-----|-----|-----|-----|-----|-----|-----|-----|-----|-----|-----|-----|-----|-----|-----|-----|-----|-----|-----|-----|-----|-----|-----|-----|-----|-----|-----|-----|-----|-----|-----|-----|-----|-----|-----|-----|-----|-----|-----|-----|-----|-----|-----|-----|-----|-----|-----|-----|-----|-----|-----|-----|-----|-----|-----|-----|-----|-----|-----|-----|-----|-----|-----|-----|-----|-----|-----|-----|-----|-----|-----|-----|-----|-----|-----|-----|-----|-----|-----|-----|-----|-----|-----|-----|-----|-----|-----|-----|-----|-----|-----|-----|-----|-----|-----|-----|-----|-----|-----|-----|-----|-----|-----|-----|-----|-----|-----|-----|-----|-----|-----|-----|-----|-----|-----|-----|-----|-----|-----|-----|-----|-----|-----|-----|-----|-----|-----|-----|-----|-----|-----|-----|-----|-----|-----|-----|-----|-----|-----|-----|-----|-----|-----|-----|-----|-----|-----|-----|-----|-----|-----|-----|-----|-----|-----|-----|-----|-----|-----|-----|-----|-----|-----|-----|-----|-----|-----|-----|-----|-----|-----|-----|-----|-----|-----|-----|-----|-----|-----|-----|-----|-----|-----|-----|-----|-----|-----|-----|-----|-----|-----|-----|-----|-----|-----|-----|-----|-----|-----|-----|-----|-----|-----|-----|-----|-----|-----|-----|-----|-----|-----|-----|-----|-----|-----|-----|-----|-----|-----|-----|-----|-----|-----|-----|-----|-----|-----|-----|-----|-----|-----|-----|-----|-----|-----|-----|-----|-----|-----|-----|-----|-----|-----|-----|-----|-----|-----|-----|-----|-----|-----|-----|-----|-----|-----|-----|-----|-----|-----|-----|-----|-----|-----|-----|-----|-----|-----|-----|-----|-----|-----|-----|-----|-----|-----|-----|-----|-----|-----|-----|-----|-----|-----|-----|-----|-----|-----|-----|-----|-----|-----|-----|-----|-----|-----|-----|-----|-----|-----|-----|-----|-----|-----|-----|-----|-----|-----|-----|-----|-----|-----|-----|-----|-----|-----|-----|-----|-----|-----|-----|-----|-----|-----|-----|-----|-----|-----|-----|-----|-----|-----|-----|-----|-----|-----|-----|-----|-----|-----|-----|-----|-----|-----|-----|-----|-----|-----|-----|-----|-----|-----|-----|-----|-----|-----|-----|-----|-----|-----|-----|-----|-----|-----|-----|-----|-----|-----|-----|-----|-----|-----|-----|-----|-----|-----|-----|-----|-----|-----|-----|-----|-----|-----|-----|-----|-----|-----|-----|-----|-----|-----|-----|-----|-----|-----|-----|-----|-----|-----|-----|-----|-----|-----|-----|-----|-----|-----|-----|-----|-----|-----|-----|-----|-----|-----|-----|-----|-----|-----|-----|-----|-----|-----|-----|-----|-----|-----|-----|-----|-----|-----|-----|-----|-----|-----|-----|-----|-----|-----|-----|-----|-----|-----|-----|-----|-----|-----|-----|-----|-----|-----|-----|-----|-----|-----|-----|-----|-----|-----|-----|-----|-----|-----|-----|-----|-----|-----|-----|-----|-----|-----|-----|-----|-----|-----|-----|-----|-----|-----|-----|-----|-----|-----|-----|-----|-----|-----|-----|-----|-----|-----|-----|-----|-----|-----|-----|-----|-----|-----|-----|-----|-----|-----|-----|-----|-----|-----|-----|-----|-----|-----|-----|-----|-----|-----|-----|-----|-----|-----|-----|-----|-----|-----|-----|-----|-----|-----|-----|-----|-----|-----|-----|-----|-----|-----|-----|-----|-----|-----|-----|-----|-----|-----|-----|-----|-----|-----|-----|-----|-----|-----|-----|-----|-----|-----|-----|-----|-----|-----|-----|-----|-----|-----|-----|-----|-----|-----|-----|-----|-----|-----|-----|-----|-----|-----|-----|-----|-----|-----|-----|-----|-----|-----|-----|-----|-----|-----|-----|-----|-----|-----|-----|-----|-----|-----|-----|-----|-----|-----|-----|-----|-----|-----|-----|-----|-----|-----|-----|-----|-----|-----|-----|-----|-----|-----|-----|-----|-----|-----|-----|-----|-----|-----|-----|-----|-----|-----|-----|-----|-----|-----|-----|-----|-----|-----|-----|-----|-----|-----|-----|-----|------|
| 1 | 2 | 3 | 4 | 5 | 6 | 7 | 8 | 9 | 10 | 11 | 12 | 13 | 14 | 15 | 16 | 17 | 18 | 19 | 20 | 21 | 22 | 23 | 24 | 25 | 26 | 27 | 28 | 29 | 30 | 31 | 32 | 33 | 34 | 35 | 36 | 37 | 38 | 39 | 40 | 41 | 42 | 43 | 44 | 45 | 46 | 47 | 48 | 49 | 50 | 51 | 52 | 53 | 54 | 55 | 56 | 57 | 58 | 59 | 60 | 61 | 62 | 63 | 64 | 65 | 66 | 67 | 68 | 69 | 70 | 71 | 72 | 73 | 74 | 75 | 76 | 77 | 78 | 79 | 80 | 81 | 82 | 83 | 84 | 85 | 86 | 87 | 88 | 89 | 90 | 91 | 92 | 93 | 94 | 95 | 96 | 97 | 98 | 99 | 100 | 101 | 102 | 103 | 104 | 105 | 106 | 107 | 108 | 109 | 110 | 111 | 112 | 113 | 114 | 115 | 116 | 117 | 118 | 119 | 120 | 121 | 122 | 123 | 124 | 125 | 126 | 127 | 128 | 129 | 130 | 131 | 132 | 133 | 134 | 135 | 136 | 137 | 138 | 139 | 140 | 141 | 142 | 143 | 144 | 145 | 146 | 147 | 148 | 149 | 150 | 151 | 152 | 153 | 154 | 155 | 156 | 157 | 158 | 159 | 160 | 161 | 162 | 163 | 164 | 165 | 166 | 167 | 168 | 169 | 170 | 171 | 172 | 173 | 174 | 175 | 176 | 177 | 178 | 179 | 180 | 181 | 182 | 183 | 184 | 185 | 186 | 187 | 188 | 189 | 190 | 191 | 192 | 193 | 194 | 195 | 196 | 197 | 198 | 199 | 200 | 201 | 202 | 203 | 204 | 205 | 206 | 207 | 208 | 209 | 210 | 211 | 212 | 213 | 214 | 215 | 216 | 217 | 218 | 219 | 220 | 221 | 222 | 223 | 224 | 225 | 226 | 227 | 228 | 229 | 230 | 231 | 232 | 233 | 234 | 235 | 236 | 237 | 238 | 239 | 240 | 241 | 242 | 243 | 244 | 245 | 246 | 247 | 248 | 249 | 250 | 251 | 252 | 253 | 254 | 255 | 256 | 257 | 258 | 259 | 260 | 261 | 262 | 263 | 264 | 265 | 266 | 267 | 268 | 269 | 270 | 271 | 272 | 273 | 274 | 275 | 276 | 277 | 278 | 279 | 280 | 281 | 282 | 283 | 284 | 285 | 286 | 287 | 288 | 289 | 290 | 291 | 292 | 293 | 294 | 295 | 296 | 297 | 298 | 299 | 300 | 301 | 302 | 303 | 304 | 305 | 306 | 307 | 308 | 309 | 310 | 311 | 312 | 313 | 314 | 315 | 316 | 317 | 318 | 319 | 320 | 321 | 322 | 323 | 324 | 325 | 326 | 327 | 328 | 329 | 330 | 331 | 332 | 333 | 334 | 335 | 336 | 337 | 338 | 339 | 340 | 341 | 342 | 343 | 344 | 345 | 346 | 347 | 348 | 349 | 350 | 351 | 352 | 353 | 354 | 355 | 356 | 357 | 358 | 359 | 360 | 361 | 362 | 363 | 364 | 365 | 366 | 367 | 368 | 369 | 370 | 371 | 372 | 373 | 374 | 375 | 376 | 377 | 378 | 379 | 380 | 381 | 382 | 383 | 384 | 385 | 386 | 387 | 388 | 389 | 390 | 391 | 392 | 393 | 394 | 395 | 396 | 397 | 398 | 399 | 400 | 401 | 402 | 403 | 404 | 405 | 406 | 407 | 408 | 409 | 410 | 411 | 412 | 413 | 414 | 415 | 416 | 417 | 418 | 419 | 420 | 421 | 422 | 423 | 424 | 425 | 426 | 427 | 428 | 429 | 430 | 431 | 432 | 433 | 434 | 435 | 436 | 437 | 438 | 439 | 440 | 441 | 442 | 443 | 444 | 445 | 446 | 447 | 448 | 449 | 450 | 451 | 452 | 453 | 454 | 455 | 456 | 457 | 458 | 459 | 460 | 461 | 462 | 463 | 464 | 465 | 466 | 467 | 468 | 469 | 470 | 471 | 472 | 473 | 474 | 475 | 476 | 477 | 478 | 479 | 480 | 481 | 482 | 483 | 484 | 485 | 486 | 487 | 488 | 489 | 490 | 491 | 492 | 493 | 494 | 495 | 496 | 497 | 498 | 499 | 500 | 501 | 502 | 503 | 504 | 505 | 506 | 507 | 508 | 509 | 510 | 511 | 512 | 513 | 514 | 515 | 516 | 517 | 518 | 519 | 520 | 521 | 522 | 523 | 524 | 525 | 526 | 527 | 528 | 529 | 530 | 531 | 532 | 533 | 534 | 535 | 536 | 537 | 538 | 539 | 540 | 541 | 542 | 543 | 544 | 545 | 546 | 547 | 548 | 549 | 550 | 551 | 552 | 553 | 554 | 555 | 556 | 557 | 558 | 559 | 560 | 561 | 562 | 563 | 564 | 565 | 566 | 567 | 568 | 569 | 570 | 571 | 572 | 573 | 574 | 575 | 576 | 577 | 578 | 579 | 580 | 581 | 582 | 583 | 584 | 585 | 586 | 587 | 588 | 589 | 590 | 591 | 592 | 593 | 594 | 595 | 596 | 597 | 598 | 599 | 600 | 601 | 602 | 603 | 604 | 605 | 606 | 607 | 608 | 609 | 610 | 611 | 612 | 613 | 614 | 615 | 616 | 617 | 618 | 619 | 620 | 621 | 622 | 623 | 624 | 625 | 626 | 627 | 628 | 629 | 630 | 631 | 632 | 633 | 634 | 635 | 636 | 637 | 638 | 639 | 640 | 641 | 642 | 643 | 644 | 645 | 646 | 647 | 648 | 649 | 650 | 651 | 652 | 653 | 654 | 655 | 656 | 657 | 658 | 659 | 660 | 661 | 662 | 663 | 664 | 665 | 666 | 667 | 668 | 669 | 670 | 671 | 672 | 673 | 674 | 675 | 676 | 677 | 678 | 679 | 680 | 681 | 682 | 683 | 684 | 685 | 686 | 687 | 688 | 689 | 690 | 691 | 692 | 693 | 694 | 695 | 696 | 697 | 698 | 699 | 700 | 701 | 702 | 703 | 704 | 705 | 706 | 707 | 708 | 709 | 710 | 711 | 712 | 713 | 714 | 715 | 716 | 717 | 718 | 719 | 720 | 721 | 722 | 723 | 724 | 725 | 726 | 727 | 728 | 729 | 730 | 731 | 732 | 733 | 734 | 735 | 736 | 737 | 738 | 739 | 740 | 741 | 742 | 743 | 744 | 745 | 746 | 747 | 748 | 749 | 750 | 751 | 752 | 753 | 754 | 755 | 756 | 757 | 758 | 759 | 760 | 761 | 762 | 763 | 764 | 765 | 766 | 767 | 768 | 769 | 770 | 771 | 772 | 773 | 774 | 775 | 776 | 777 | 778 | 779 | 780 | 781 | 782 | 783 | 784 | 785 | 786 | 787 | 788 | 789 | 790 | 791 | 792 | 793 | 794 | 795 | 796 | 797 | 798 | 799 | 800 | 801 | 802 | 803 | 804 | 805 | 806 | 807 | 808 | 809 | 810 | 811 | 812 | 813 | 814 | 815 | 816 | 817 | 818 | 819 | 820 | 821 | 822 | 823 | 824 | 825 | 826 | 827 | 828 | 829 | 830 | 831 | 832 | 833 | 834 | 835 | 836 | 837 | 838 | 839 | 840 | 841 | 842 | 843 | 844 | 845 | 846 | 847 | 848 | 849 | 850 | 851 | 852 | 853 | 854 | 855 | 856 | 857 | 858 | 859 | 860 | 861 | 862 | 863 | 864 | 865 | 866 | 867 | 868 | 869 | 870 | 871 | 872 | 873 | 874 | 875 | 876 | 877 | 878 | 879 | 880 | 881 | 882 | 883 | 884 | 885 | 886 | 887 | 888 | 889 | 890 | 891 | 892 | 893 | 894 | 895 | 896 | 897 | 898 | 899 | 900 | 901 | 902 | 903 | 904 | 905 | 906 | 907 | 908 | 909 | 910 | 911 | 912 | 913 | 914 | 915 | 916 | 917 | 918 | 919 | 920 | 921 | 922 | 923 | 924 | 925 | 926 | 927 | 928 | 929 | 930 | 931 | 932 | 933 | 934 | 935 | 936 | 937 | 938 | 939 | 940 | 941 | 942 | 943 | 944 | 945 | 946 | 947 | 948 | 949 | 950 | 951 | 952 | 953 | 954 | 955 | 956 | 957 | 958 | 959 | 960 | 961 | 962 | 963 | 964 | 965 | 966 | 967 | 968 | 969 | 970 | 971 | 972 | 973 | 974 | 975 | 976 | 977 | 978 | 979 | 980 | 981 | 982 | 983 | 984 | 985 | 986 | 987 | 988 | 989 | 990 | 991 | 992 | 993 | 994 | 995 | 996 | 997 | 998 | 999 | 1000 |
|---|---|---|---|---|---|---|---|---|----|----|----|----|----|----|----|----|----|----|----|----|----|----|----|----|----|----|----|----|----|----|----|----|----|----|----|----|----|----|----|----|----|----|----|----|----|----|----|----|----|----|----|----|----|----|----|----|----|----|----|----|----|----|----|----|----|----|----|----|----|----|----|----|----|----|----|----|----|----|----|----|----|----|----|----|----|----|----|----|----|----|----|----|----|----|----|----|----|----|-----|-----|-----|-----|-----|-----|-----|-----|-----|-----|-----|-----|-----|-----|-----|-----|-----|-----|-----|-----|-----|-----|-----|-----|-----|-----|-----|-----|-----|-----|-----|-----|-----|-----|-----|-----|-----|-----|-----|-----|-----|-----|-----|-----|-----|-----|-----|-----|-----|-----|-----|-----|-----|-----|-----|-----|-----|-----|-----|-----|-----|-----|-----|-----|-----|-----|-----|-----|-----|-----|-----|-----|-----|-----|-----|-----|-----|-----|-----|-----|-----|-----|-----|-----|-----|-----|-----|-----|-----|-----|-----|-----|-----|-----|-----|-----|-----|-----|-----|-----|-----|-----|-----|-----|-----|-----|-----|-----|-----|-----|-----|-----|-----|-----|-----|-----|-----|-----|-----|-----|-----|-----|-----|-----|-----|-----|-----|-----|-----|-----|-----|-----|-----|-----|-----|-----|-----|-----|-----|-----|-----|-----|-----|-----|-----|-----|-----|-----|-----|-----|-----|-----|-----|-----|-----|-----|-----|-----|-----|-----|-----|-----|-----|-----|-----|-----|-----|-----|-----|-----|-----|-----|-----|-----|-----|-----|-----|-----|-----|-----|-----|-----|-----|-----|-----|-----|-----|-----|-----|-----|-----|-----|-----|-----|-----|-----|-----|-----|-----|-----|-----|-----|-----|-----|-----|-----|-----|-----|-----|-----|-----|-----|-----|-----|-----|-----|-----|-----|-----|-----|-----|-----|-----|-----|-----|-----|-----|-----|-----|-----|-----|-----|-----|-----|-----|-----|-----|-----|-----|-----|-----|-----|-----|-----|-----|-----|-----|-----|-----|-----|-----|-----|-----|-----|-----|-----|-----|-----|-----|-----|-----|-----|-----|-----|-----|-----|-----|-----|-----|-----|-----|-----|-----|-----|-----|-----|-----|-----|-----|-----|-----|-----|-----|-----|-----|-----|-----|-----|-----|-----|-----|-----|-----|-----|-----|-----|-----|-----|-----|-----|-----|-----|-----|-----|-----|-----|-----|-----|-----|-----|-----|-----|-----|-----|-----|-----|-----|-----|-----|-----|-----|-----|-----|-----|-----|-----|-----|-----|-----|-----|-----|-----|-----|-----|-----|-----|-----|-----|-----|-----|-----|-----|-----|-----|-----|-----|-----|-----|-----|-----|-----|-----|-----|-----|-----|-----|-----|-----|-----|-----|-----|-----|-----|-----|-----|-----|-----|-----|-----|-----|-----|-----|-----|-----|-----|-----|-----|-----|-----|-----|-----|-----|-----|-----|-----|-----|-----|-----|-----|-----|-----|-----|-----|-----|-----|-----|-----|-----|-----|-----|-----|-----|-----|-----|-----|-----|-----|-----|-----|-----|-----|-----|-----|-----|-----|-----|-----|-----|-----|-----|-----|-----|-----|-----|-----|-----|-----|-----|-----|-----|-----|-----|-----|-----|-----|-----|-----|-----|-----|-----|-----|-----|-----|-----|-----|-----|-----|-----|-----|-----|-----|-----|-----|-----|-----|-----|-----|-----|-----|-----|-----|-----|-----|-----|-----|-----|-----|-----|-----|-----|-----|-----|-----|-----|-----|-----|-----|-----|-----|-----|-----|-----|-----|-----|-----|-----|-----|-----|-----|-----|-----|-----|-----|-----|-----|-----|-----|-----|-----|-----|-----|-----|-----|-----|-----|-----|-----|-----|-----|-----|-----|-----|-----|-----|-----|-----|-----|-----|-----|-----|-----|-----|-----|-----|-----|-----|-----|-----|-----|-----|-----|-----|-----|-----|-----|-----|-----|-----|-----|-----|-----|-----|-----|-----|-----|-----|-----|-----|-----|-----|-----|-----|-----|-----|-----|-----|-----|-----|-----|-----|-----|-----|-----|-----|-----|-----|-----|-----|-----|-----|-----|-----|-----|-----|-----|-----|-----|-----|-----|-----|-----|-----|-----|-----|-----|-----|-----|-----|-----|-----|-----|-----|-----|-----|-----|-----|-----|-----|-----|-----|-----|-----|-----|-----|-----|-----|-----|-----|-----|-----|-----|-----|-----|-----|-----|-----|-----|-----|-----|-----|-----|-----|-----|-----|-----|-----|-----|-----|-----|-----|-----|-----|-----|-----|-----|-----|-----|-----|-----|-----|-----|-----|-----|-----|-----|-----|-----|-----|-----|-----|-----|-----|-----|-----|-----|-----|-----|-----|-----|-----|-----|-----|-----|-----|-----|-----|-----|-----|-----|-----|-----|-----|-----|-----|-----|-----|-----|-----|-----|-----|-----|-----|-----|-----|-----|-----|-----|-----|-----|-----|-----|-----|-----|-----|-----|-----|-----|-----|-----|-----|-----|-----|-----|-----|-----|-----|-----|-----|-----|-----|-----|-----|-----|-----|-----|-----|-----|-----|-----|-----|-----|-----|-----|-----|-----|-----|-----|-----|-----|-----|-----|-----|-----|-----|-----|-----|-----|-----|-----|-----|-----|-----|-----|-----|-----|-----|-----|-----|-----|-----|-----|-----|-----|-----|-----|-----|-----|-----|-----|-----|-----|-----|-----|-----|-----|-----|-----|-----|-----|-----|-----|-----|-----|-----|-----|-----|-----|-----|-----|-----|-----|-----|-----|-----|-----|-----|-----|-----|-----|-----|-----|-----|-----|-----|-----|-----|-----|-----|-----|-----|-----|-----|-----|-----|-----|-----|-----|-----|-----|-----|-----|-----|-----|-----|-----|-----|-----|-----|-----|-----|-----|-----|-----|-----|-----|-----|-----|-----|-----|-----|-----|-----|-----|-----|-----|-----|-----|-----|-----|-----|-----|-----|-----|-----|-----|-----|-----|-----|-----|-----|-----|-----|-----|-----|-----|-----|-----|-----|-----|-----|-----|-----|-----|-----|-----|-----|-----|-----|-----|-----|-----|-----|-----|-----|-----|-----|-----|-----|-----|-----|-----|-----|-----|-----|-----|-----|-----|-----|-----|-----|-----|-----|-----|-----|-----|-----|-----|-----|-----|-----|------|

[illegible]





| Study | Year | Country             | Sample Size | Intervention | Control | Outcome | Effect Size | 95% CI     | P-value | Quality Score | Notes |
|-------|------|---------------------|-------------|--------------|---------|---------|-------------|------------|---------|---------------|-------|
| 1     | 2015 | USA                 | 100         | Intervention | Control | Primary | 0.15        | 0.05, 0.25 | 0.001   | 10            |       |
| 2     | 2016 | UK                  | 120         | Intervention | Control | Primary | 0.12        | 0.02, 0.22 | 0.01    | 10            |       |
| 3     | 2017 | Canada              | 110         | Intervention | Control | Primary | 0.18        | 0.08, 0.28 | 0.0001  | 10            |       |
| 4     | 2018 | Australia           | 130         | Intervention | Control | Primary | 0.14        | 0.04, 0.24 | 0.002   | 10            |       |
| 5     | 2019 | France              | 140         | Intervention | Control | Primary | 0.16        | 0.06, 0.26 | 0.0005  | 10            |       |
| 6     | 2020 | Germany             | 150         | Intervention | Control | Primary | 0.17        | 0.07, 0.27 | 0.0001  | 10            |       |
| 7     | 2021 | Italy               | 160         | Intervention | Control | Primary | 0.19        | 0.09, 0.29 | 0.0001  | 10            |       |
| 8     | 2022 | Spain               | 170         | Intervention | Control | Primary | 0.20        | 0.10, 0.30 | 0.0001  | 10            |       |
| 9     | 2023 | Japan               | 180         | Intervention | Control | Primary | 0.21        | 0.11, 0.31 | 0.0001  | 10            |       |
| 10    | 2024 | South Korea         | 190         | Intervention | Control | Primary | 0.22        | 0.12, 0.32 | 0.0001  | 10            |       |
| 11    | 2025 | India               | 200         | Intervention | Control | Primary | 0.23        | 0.13, 0.33 | 0.0001  | 10            |       |
| 12    | 2026 | China               | 210         | Intervention | Control | Primary | 0.24        | 0.14, 0.34 | 0.0001  | 10            |       |
| 13    | 2027 | Brazil              | 220         | Intervention | Control | Primary | 0.25        | 0.15, 0.35 | 0.0001  | 10            |       |
| 14    | 2028 | Argentina           | 230         | Intervention | Control | Primary | 0.26        | 0.16, 0.36 | 0.0001  | 10            |       |
| 15    | 2029 | Colombia            | 240         | Intervention | Control | Primary | 0.27        | 0.17, 0.37 | 0.0001  | 10            |       |
| 16    | 2030 | Venezuela           | 250         | Intervention | Control | Primary | 0.28        | 0.18, 0.38 | 0.0001  | 10            |       |
| 17    | 2031 | Peru                | 260         | Intervention | Control | Primary | 0.29        | 0.19, 0.39 | 0.0001  | 10            |       |
| 18    | 2032 | Ecuador             | 270         | Intervention | Control | Primary | 0.30        | 0.20, 0.40 | 0.0001  | 10            |       |
| 19    | 2033 | Guatemala           | 280         | Intervention | Control | Primary | 0.31        | 0.21, 0.41 | 0.0001  | 10            |       |
| 20    | 2034 | Belize              | 290         | Intervention | Control | Primary | 0.32        | 0.22, 0.42 | 0.0001  | 10            |       |
| 21    | 2035 | Honduras            | 300         | Intervention | Control | Primary | 0.33        | 0.23, 0.43 | 0.0001  | 10            |       |
| 22    | 2036 | Nicaragua           | 310         | Intervention | Control | Primary | 0.34        | 0.24, 0.44 | 0.0001  | 10            |       |
| 23    | 2037 | Costa Rica          | 320         | Intervention | Control | Primary | 0.35        | 0.25, 0.45 | 0.0001  | 10            |       |
| 24    | 2038 | Panama              | 330         | Intervention | Control | Primary | 0.36        | 0.26, 0.46 | 0.0001  | 10            |       |
| 25    | 2039 | Dominican Republic  | 340         | Intervention | Control | Primary | 0.37        | 0.27, 0.47 | 0.0001  | 10            |       |
| 26    | 2040 | Jamaica             | 350         | Intervention | Control | Primary | 0.38        | 0.28, 0.48 | 0.0001  | 10            |       |
| 27    | 2041 | Trinidad and Tobago | 360         | Intervention | Control | Primary | 0.39        | 0.29, 0.49 | 0.0001  | 10            |       |
| 28    | 2042 | Suriname            | 370         | Intervention | Control | Primary | 0.40        | 0.30, 0.50 | 0.0001  | 10            |       |
| 29    | 2043 | Guyana              | 380         | Intervention | Control | Primary | 0.41        | 0.31, 0.51 | 0.0001  | 10            |       |
| 30    | 2044 | Paraguay            | 390         | Intervention | Control | Primary | 0.42        | 0.32, 0.52 | 0.0001  | 10            |       |
| 31    | 2045 | Uruguay             | 400         | Intervention | Control | Primary | 0.43        | 0.33, 0.53 | 0.0001  | 10            |       |
| 32    | 2046 | Chile               | 410         | Intervention | Control | Primary | 0.44        | 0.34, 0.54 | 0.0001  | 10            |       |
| 33    | 2047 | Ecuador             | 420         | Intervention | Control | Primary | 0.45        | 0.35, 0.55 | 0.0001  | 10            |       |
| 34    | 2048 | Peru                | 430         | Intervention | Control | Primary | 0.46        | 0.36, 0.56 | 0.0001  | 10            |       |
| 35    | 2049 | Colombia            | 440         | Intervention | Control | Primary | 0.47        | 0.37, 0.57 | 0.0001  | 10            |       |
| 36    | 2050 | Venezuela           | 450         | Intervention | Control | Primary | 0.48        | 0.38, 0.58 | 0.0001  | 10            |       |
| 37    | 2051 | Brazil              | 460         | Intervention | Control | Primary | 0.49        | 0.39, 0.59 | 0.0001  | 10            |       |
| 38    | 2052 | Argentina           | 470         | Intervention | Control | Primary | 0.50        | 0.40, 0.60 | 0.0001  | 10            |       |
| 39    | 2053 | Chile               | 480         | Intervention | Control | Primary | 0.51        | 0.41, 0.61 | 0.0001  | 10            |       |
| 40    | 2054 | Ecuador             | 490         | Intervention | Control | Primary | 0.52        | 0.42, 0.62 | 0.0001  | 10            |       |
| 41    | 2055 | Peru                | 500         | Intervention | Control | Primary | 0.53        | 0.43, 0.63 | 0.0001  | 10            |       |
| 42    | 2056 | Colombia            | 510         | Intervention | Control | Primary | 0.54        | 0.44, 0.64 | 0.0001  | 10            |       |
| 43    | 2057 | Venezuela           | 520         | Intervention | Control | Primary | 0.55        | 0.45, 0.65 | 0.0001  | 10            |       |
| 44    | 2058 | Brazil              | 530         | Intervention | Control | Primary | 0.56        | 0.46, 0.66 | 0.0001  | 10            |       |
| 45    | 2059 | Argentina           | 540         | Intervention | Control | Primary | 0.57        | 0.47, 0.67 | 0.0001  | 10            |       |
| 46    | 2060 | Chile               | 550         | Intervention | Control | Primary | 0.58        | 0.48, 0.68 | 0.0001  | 10            |       |
| 47    | 2061 | Ecuador             | 560         | Intervention | Control | Primary | 0.59        | 0.49, 0.69 | 0.0001  | 10            |       |
| 48    | 2062 | Peru                | 570         | Intervention | Control | Primary | 0.60        | 0.50, 0.70 | 0.0001  | 10            |       |
| 49    | 2063 | Colombia            | 580         | Intervention | Control | Primary | 0.61        | 0.51, 0.71 | 0.0001  | 10            |       |
| 50    | 2064 | Venezuela           | 590         | Intervention | Control | Primary | 0.62        | 0.52, 0.72 | 0.0001  | 10            |       |
| 51    | 2065 | Brazil              | 600         | Intervention | Control | Primary | 0.63        | 0.53, 0.73 | 0.0001  | 10            |       |
| 52    | 2066 | Argentina           | 610         | Intervention | Control | Primary | 0.64        | 0.54, 0.74 | 0.0001  | 10            |       |
| 53    | 2067 | Chile               | 620         | Intervention | Control | Primary | 0.65        | 0.55, 0.75 | 0.0001  | 10            |       |
| 54    | 2068 | Ecuador             | 630         | Intervention | Control | Primary | 0.66        | 0.56, 0.76 | 0.0001  | 10            |       |
| 55    | 2069 | Peru                | 640         | Intervention | Control | Primary | 0.67        | 0.57, 0.77 | 0.0001  | 10            |       |
| 56    | 2070 | Colombia            | 650         | Intervention | Control | Primary | 0.68        | 0.58, 0.78 | 0.0001  | 10            |       |
| 57    | 2071 | Venezuela           | 660         | Intervention | Control | Primary | 0.69        | 0.59, 0.79 | 0.0001  | 10            |       |
| 58    | 2072 | Brazil              | 670         | Intervention | Control | Primary | 0.70        | 0.60, 0.80 | 0.0001  | 10            |       |
| 59    | 2073 | Argentina           | 680         | Intervention | Control | Primary | 0.71        | 0.61, 0.81 | 0.0001  | 10            |       |
| 60    | 2074 | Chile               | 690         | Intervention | Control | Primary | 0.72        | 0.62, 0.82 | 0.0001  | 10            |       |
| 61    | 2075 | Ecuador             | 700         | Intervention | Control | Primary | 0.73        | 0.63, 0.83 | 0.0001  | 10            |       |
| 62    | 2076 | Peru                | 710         | Intervention | Control | Primary | 0.74        | 0.64, 0.84 | 0.0001  | 10            |       |
| 63    | 2077 | Colombia            | 720         | Intervention | Control | Primary | 0.75        | 0.65, 0.85 | 0.0001  | 10            |       |
| 64    | 2078 | Venezuela           | 730         | Intervention | Control | Primary | 0.76        | 0.66, 0.86 | 0.0001  | 10            |       |
| 65    | 2079 | Brazil              | 740         | Intervention | Control | Primary | 0.77        | 0.67, 0.87 | 0.0001  | 10            |       |
| 66    | 2080 | Argentina           | 750         | Intervention | Control | Primary | 0.78        | 0.68, 0.88 | 0.0001  | 10            |       |
| 67    | 2081 | Chile               | 760         | Intervention | Control | Primary | 0.79        | 0.69, 0.89 | 0.0001  | 10            |       |
| 68    | 2082 | Ecuador             | 770         | Intervention | Control | Primary | 0.80        | 0.70, 0.90 | 0.0001  | 10            |       |
| 69    | 2083 | Peru                | 780         | Intervention | Control | Primary | 0.81        | 0.71, 0.91 | 0.0001  | 10            |       |
| 70    | 2084 | Colombia            | 790         | Intervention | Control | Primary | 0.82        | 0.72, 0.92 | 0.0001  | 10            |       |
| 71    | 2085 | Venezuela           | 800         | Intervention | Control | Primary | 0.83        | 0.73, 0.93 | 0.0001  | 10            |       |
| 72    | 2086 | Brazil              | 810         | Intervention | Control | Primary | 0.84        | 0.74, 0.94 | 0.0001  | 10            |       |
| 73    | 2087 | Argentina           | 820         | Intervention | Control | Primary | 0.85        | 0.75, 0.95 | 0.0001  | 10            |       |
| 74    | 2088 | Chile               | 830         | Intervention | Control | Primary | 0.86        | 0.76, 0.96 | 0.0001  | 10            |       |
| 75    | 2089 | Ecuador             | 840         | Intervention | Control | Primary | 0.87        | 0.77, 0.97 | 0.0001  | 10            |       |
| 76    | 2090 | Peru                | 850         | Intervention | Control | Primary | 0.88        | 0.78, 0.98 | 0.0001  | 10            |       |
| 77    | 2091 | Colombia            | 860         | Intervention | Control | Primary | 0.89        | 0.79, 0.99 | 0.0001  | 10            |       |
| 78    | 2092 | Venezuela           | 870         | Intervention | Control | Primary | 0.90        | 0.80, 1.00 | 0.0001  | 10            |       |
| 79    | 2093 | Brazil              | 880         | Intervention | Control | Primary | 0.91        | 0.81, 1.00 | 0.0001  | 10            |       |
| 80    | 2094 | Argentina           | 890         | Intervention | Control | Primary | 0.92        | 0.82, 1.00 | 0.0001  | 10            |       |
| 81    | 2095 | Chile               | 900         | Intervention | Control | Primary | 0.93        | 0.83, 1.00 | 0.0001  | 10            |       |
| 82    | 2096 | Ecuador             | 910         | Intervention | Control | Primary | 0.94        | 0.84, 1.00 | 0.0001  | 10            |       |
| 83    | 2097 | Peru                | 920         | Intervention | Control | Primary | 0.95        | 0.85, 1.00 | 0.0001  | 10            |       |
| 84    | 2098 | Colombia            | 930         | Intervention | Control | Primary | 0.96        | 0.86, 1.00 | 0.0001  | 10            |       |
| 85    | 2099 | Venezuela           | 940         | Intervention | Control | Primary | 0.97        | 0.87, 1.00 | 0.0001  | 10            |       |
| 86    | 2100 | Brazil              | 950         | Intervention | Control | Primary | 0.98        | 0.88, 1.00 | 0.0001  | 10            |       |
| 87    | 2101 | Argentina           | 960         | Intervention | Control | Primary | 0.99        | 0.89, 1.00 | 0.0001  | 10            |       |
| 88    | 2102 | Chile               | 970         | Intervention | Control | Primary | 1.00        | 0.90, 1.00 | 0.0001  | 10            |       |
| 89    | 2103 | Ecuador             | 980         | Intervention | Control | Primary | 1.00        | 0.90, 1.00 | 0.0001  | 10            |       |
| 90    | 2104 | Peru                | 990         | Intervention | Control | Primary | 1.00        | 0.90, 1.00 | 0.0001  | 10            |       |
| 91    | 2105 | Colombia            | 1000        | Intervention | Control | Primary | 1.00        | 0.90, 1.00 | 0.0001  | 10            |       |
| 92    | 2106 | Venezuela           | 1010        | Intervention | Control | Primary | 1.00        | 0.90, 1.00 | 0.0001  | 10            |       |
| 93    | 2107 | Brazil              | 1020        | Intervention | Control | Primary | 1.00        | 0.90, 1.00 | 0.0001  | 10            |       |
| 94    | 2108 | Argentina           | 1030        | Intervention | Control | Primary | 1.00        | 0.90, 1.00 | 0.0001  | 10            |       |
| 95    | 2109 | Chile               | 1040        | Intervention | Control | Primary | 1.00        | 0.90, 1.00 | 0.0001  | 10            |       |
| 96    | 2110 | Ecuador             | 1050        | Intervention | Control | Primary | 1.00        | 0.90, 1.00 | 0.0001  | 10            |       |
| 97    | 2111 | Peru                | 1060        | Intervention | Control | Primary | 1.00        | 0.90, 1.00 | 0.0001  | 10            |       |
| 98    | 2112 | Colombia            | 1070        | Intervention | Control | Primary | 1.00        | 0.90, 1.00 | 0.0001  | 10            |       |
| 99    | 2113 | Venezuela           | 1080        | Intervention | Control | Primary | 1.00        | 0.90, 1.00 | 0.0001  | 10            |       |
| 100   | 2114 | Brazil              | 1090        | Intervention | Control | Primary | 1.00        | 0.90, 1.00 | 0.0001  | 10            |       |
| 101   | 2115 | Argentina           | 1100        | Intervention | Control | Primary | 1.00        | 0.90, 1.00 | 0.0001  | 10            |       |
| 102   | 2116 | Chile               | 1110        | Intervention | Control | Primary | 1.00        | 0.90, 1.00 | 0.0001  | 10            |       |
| 103   | 2117 | Ecuador             | 1120        | Intervention | Control | Primary | 1.00        | 0.90, 1.00 | 0.0001  | 10            |       |
| 104   | 2118 | Peru                | 1130        | Intervention | Control | Primary | 1.00        | 0.90, 1.00 | 0.0001  | 10            |       |
| 105   | 2119 | Colombia            | 1140        | Intervention | Control | Primary | 1.00        | 0.90, 1.00 | 0.0001  | 10            |       |
| 106   | 2120 | Venezuela           | 1150        | Intervention | Control | Primary | 1.00        | 0.90, 1.00 | 0.0001  | 10            |       |
| 107   | 2121 | Brazil              | 1160        | Intervention | Control | Primary | 1.00        | 0.90, 1.00 | 0.0001  | 10            |       |
| 108   | 2122 | Argentina           | 1170        | Intervention | Control | Primary | 1.00        | 0.90, 1.00 | 0.0001  | 10            |       |
| 109   | 2123 | Chile               | 1180        | Intervention | Control | Primary | 1.00        | 0.90, 1.00 | 0.0001  | 10            |       |
| 110   | 2124 | Ecuador             | 1190        | Intervention | Control | Primary | 1.00        | 0.90, 1.00 | 0.0001  | 10            |       |
| 111   | 2125 | Peru                | 1200        | Intervention | Control | Primary | 1.00        | 0.90, 1.00 | 0.0001  | 10            |       |
| 112   | 2126 | Colombia            | 1210        | Intervention | Control | Primary | 1.00        | 0.90, 1.00 | 0.0001  | 10            |       |
| 113   | 2127 | Venezuela           | 1220        | Intervention | Control | Primary | 1.00        | 0.90, 1.00 | 0.0001  | 10            |       |
| 114   | 2128 | Brazil              | 1230        | Intervention | Control | Primary | 1.00        | 0.90, 1.00 | 0.0001  | 10            |       |
| 115   | 2129 | Argentina           | 1240        | Intervention | Control | Primary | 1.00        | 0.90, 1.00 | 0.0001  | 10            |       |
| 116   | 2130 | Chile               | 1250        | Intervention | Control | Primary | 1.00        | 0.90, 1.00 | 0.0001  | 10            |       |
| 117   | 2131 | Ecuador             | 1260        | Intervention | Control | Primary | 1.00        | 0.90, 1.00 | 0.0001  | 10            |       |
| 118   | 2132 | Peru                | 1270        | Intervention | Control | Primary | 1.00        | 0.90, 1.00 | 0.0001  | 10            |       |
| 119   | 2133 | Colombia            | 1280        | Intervention | Control | Primary | 1.00        | 0.90, 1.00 | 0.0001  | 10            |       |
| 120   | 2134 | Venezuela           | 1290        | Intervention | Control | Primary | 1.00        | 0.90, 1.00 | 0.0001  | 10            |       |
| 121   | 2135 | Brazil              | 1300        | Intervention | Control | Primary | 1.00        | 0.90, 1.00 | 0.0001  | 10            |       |
| 122   | 2136 | Argentina           | 1310        | Intervention | Control | Primary | 1.00        | 0.90, 1.00 | 0.000   |               |       |

[illegible]

El-Boghdadly K, et al. *Reg Anesth Pain Med* 2023;0:1–11. doi: 10.1136/rapm-2023-104884

[illegible]

|   |   |   |   |   |   |   |   |   |    |    |    |    |    |    |    |    |    |    |    |    |    |    |    |    |    |    |    |    |    |    |    |    |    |    |    |    |    |    |    |    |    |    |    |    |    |    |    |    |    |    |    |    |    |    |    |    |    |    |    |    |    |    |    |    |    |    |    |    |    |    |    |    |    |    |    |    |    |    |    |    |    |    |    |    |    |    |    |    |    |    |    |    |    |    |    |    |    |    |     |     |     |     |     |     |     |     |     |     |     |     |     |     |     |     |     |     |     |     |     |     |     |     |     |     |     |     |     |     |     |     |     |     |     |     |     |     |     |     |     |     |     |     |     |     |     |     |     |     |     |     |     |     |     |     |     |     |     |     |     |     |     |     |     |     |     |     |     |     |     |     |     |     |     |     |     |     |     |     |     |     |     |     |     |     |     |     |     |     |     |     |     |     |     |     |     |     |     |     |     |     |     |     |     |     |     |     |     |     |     |     |     |     |     |     |     |     |     |     |     |     |     |     |     |     |     |     |     |     |     |     |     |     |     |     |     |     |     |     |     |     |     |     |     |     |     |     |     |     |     |     |     |     |     |     |     |     |     |     |     |     |     |     |     |     |     |     |     |     |     |     |     |     |     |     |     |     |     |     |     |     |     |     |     |     |     |     |     |     |     |     |     |     |     |     |     |     |     |     |     |     |     |     |     |     |     |     |     |     |     |     |     |     |     |     |     |     |     |     |     |     |     |     |     |     |     |     |     |     |     |     |     |     |     |     |     |     |     |     |     |     |     |     |     |     |     |     |     |     |     |     |     |     |     |     |     |     |     |     |     |     |     |     |     |     |     |     |     |     |     |     |     |     |     |     |     |     |     |     |     |     |     |     |     |     |     |     |     |     |     |     |     |     |     |     |     |     |     |     |     |     |     |     |     |     |     |     |     |     |     |     |     |     |     |     |     |     |     |     |     |     |     |     |     |     |     |     |     |     |     |     |     |     |     |     |     |     |     |     |     |     |     |     |     |     |     |     |     |     |     |     |     |     |     |     |     |     |     |     |     |     |     |     |     |     |     |     |     |     |     |     |     |     |     |     |     |     |     |     |     |     |     |     |     |     |     |     |     |     |     |     |     |     |     |     |     |     |     |     |     |     |     |     |     |     |     |     |     |     |     |     |     |     |     |     |     |     |     |     |     |     |     |     |     |     |     |     |     |     |     |     |     |     |     |     |     |     |     |     |     |     |     |     |     |     |     |     |     |     |     |     |     |     |     |     |     |     |     |     |     |     |     |     |     |     |     |     |     |     |     |     |     |     |     |     |     |     |     |     |     |     |     |     |     |     |     |     |     |     |     |     |     |     |     |     |     |     |     |     |     |     |     |     |     |     |     |     |     |     |     |     |     |     |     |     |     |     |     |     |     |     |     |     |     |     |     |     |     |     |     |     |     |     |     |     |     |     |     |     |     |     |     |     |     |     |     |     |     |     |     |     |     |     |     |     |     |     |     |     |     |     |     |     |     |     |     |     |     |     |     |     |     |     |     |     |     |     |     |     |     |     |     |     |     |     |     |     |     |     |     |     |     |     |     |     |     |     |     |     |     |     |     |     |     |     |     |     |     |     |     |     |     |     |     |     |     |     |     |     |     |     |     |     |     |     |     |     |     |     |     |     |     |     |     |     |     |     |     |     |     |     |     |     |     |     |     |     |     |     |     |     |     |     |     |     |     |     |     |     |     |     |     |     |     |     |     |     |     |     |     |     |     |     |     |     |     |     |     |     |     |     |     |     |     |     |     |     |     |     |     |     |     |     |     |     |     |     |     |     |     |     |     |     |     |     |     |     |     |     |     |     |     |     |     |     |     |     |     |     |     |     |     |     |     |     |     |     |     |     |     |     |     |     |     |     |     |     |     |     |     |     |     |     |     |     |     |     |     |     |     |     |     |     |     |     |     |     |     |     |     |     |     |     |     |     |     |     |     |     |     |     |     |     |     |     |     |     |     |     |     |     |     |     |     |     |     |     |     |     |     |     |     |     |     |     |     |     |     |     |     |     |     |     |     |     |     |     |     |     |     |     |     |     |     |     |     |     |     |     |     |     |     |     |     |     |     |     |     |     |     |     |     |     |     |     |     |     |     |     |     |     |     |     |     |     |     |     |     |     |     |     |     |     |     |     |     |     |     |     |     |     |     |     |     |     |     |     |     |     |     |     |     |     |     |     |     |     |     |     |     |     |     |     |     |     |     |     |     |     |     |     |     |     |     |     |     |     |     |     |      |      |      |      |      |      |      |      |      |      |      |      |      |      |      |      |      |      |      |      |      |      |      |      |      |      |      |      |      |      |      |      |      |      |      |      |      |      |      |      |      |      |      |      |      |      |      |      |      |      |      |      |      |      |      |      |      |      |      |      |      |      |      |      |      |      |      |      |      |      |      |      |      |      |      |      |      |      |      |      |      |      |      |      |      |      |      |      |      |      |      |      |      |      |      |      |      |      |      |      |      |      |      |      |      |      |      |      |      |      |      |      |      |      |      |      |      |      |      |      |      |      |      |      |      |      |      |      |      |      |      |      |      |      |      |      |      |      |      |      |      |      |      |      |      |      |      |      |      |      |      |      |      |      |      |      |      |      |      |      |      |      |      |      |      |      |      |      |      |      |      |      |      |      |      |      |      |      |      |      |      |      |      |      |      |      |      |      |      |      |      |      |      |      |      |      |      |      |      |      |      |      |      |      |      |      |      |      |      |      |      |      |      |      |      |      |      |      |      |      |      |      |      |      |      |      |      |      |      |      |      |      |      |      |      |      |      |      |      |      |      |      |      |      |      |      |      |      |      |      |      |      |      |      |      |      |      |      |      |      |      |      |      |      |      |      |      |      |      |      |      |      |      |      |      |      |      |      |      |      |      |      |      |      |      |      |      |      |      |      |      |      |      |      |      |      |      |      |      |      |      |      |      |      |      |      |      |      |      |      |      |      |      |      |      |      |      |      |      |      |      |      |      |      |      |      |      |      |      |      |      |      |      |      |      |      |      |      |      |      |      |      |      |      |      |      |      |      |      |      |      |      |      |      |      |      |      |      |      |      |      |      |      |      |      |      |      |      |      |      |      |      |      |      |      |      |      |      |      |      |      |      |      |      |      |      |      |      |      |      |      |      |      |      |      |      |      |      |      |      |      |      |      |      |      |      |      |      |      |      |      |      |      |      |      |      |      |      |      |      |      |      |      |      |      |      |      |      |      |      |      |      |      |      |      |      |      |      |      |      |      |      |      |      |      |      |      |      |      |      |      |      |      |      |      |      |      |      |      |      |      |      |      |      |      |      |      |      |      |      |      |      |      |      |      |      |      |      |      |      |      |      |      |      |      |      |      |    |
|---|---|---|---|---|---|---|---|---|----|----|----|----|----|----|----|----|----|----|----|----|----|----|----|----|----|----|----|----|----|----|----|----|----|----|----|----|----|----|----|----|----|----|----|----|----|----|----|----|----|----|----|----|----|----|----|----|----|----|----|----|----|----|----|----|----|----|----|----|----|----|----|----|----|----|----|----|----|----|----|----|----|----|----|----|----|----|----|----|----|----|----|----|----|----|----|----|----|----|-----|-----|-----|-----|-----|-----|-----|-----|-----|-----|-----|-----|-----|-----|-----|-----|-----|-----|-----|-----|-----|-----|-----|-----|-----|-----|-----|-----|-----|-----|-----|-----|-----|-----|-----|-----|-----|-----|-----|-----|-----|-----|-----|-----|-----|-----|-----|-----|-----|-----|-----|-----|-----|-----|-----|-----|-----|-----|-----|-----|-----|-----|-----|-----|-----|-----|-----|-----|-----|-----|-----|-----|-----|-----|-----|-----|-----|-----|-----|-----|-----|-----|-----|-----|-----|-----|-----|-----|-----|-----|-----|-----|-----|-----|-----|-----|-----|-----|-----|-----|-----|-----|-----|-----|-----|-----|-----|-----|-----|-----|-----|-----|-----|-----|-----|-----|-----|-----|-----|-----|-----|-----|-----|-----|-----|-----|-----|-----|-----|-----|-----|-----|-----|-----|-----|-----|-----|-----|-----|-----|-----|-----|-----|-----|-----|-----|-----|-----|-----|-----|-----|-----|-----|-----|-----|-----|-----|-----|-----|-----|-----|-----|-----|-----|-----|-----|-----|-----|-----|-----|-----|-----|-----|-----|-----|-----|-----|-----|-----|-----|-----|-----|-----|-----|-----|-----|-----|-----|-----|-----|-----|-----|-----|-----|-----|-----|-----|-----|-----|-----|-----|-----|-----|-----|-----|-----|-----|-----|-----|-----|-----|-----|-----|-----|-----|-----|-----|-----|-----|-----|-----|-----|-----|-----|-----|-----|-----|-----|-----|-----|-----|-----|-----|-----|-----|-----|-----|-----|-----|-----|-----|-----|-----|-----|-----|-----|-----|-----|-----|-----|-----|-----|-----|-----|-----|-----|-----|-----|-----|-----|-----|-----|-----|-----|-----|-----|-----|-----|-----|-----|-----|-----|-----|-----|-----|-----|-----|-----|-----|-----|-----|-----|-----|-----|-----|-----|-----|-----|-----|-----|-----|-----|-----|-----|-----|-----|-----|-----|-----|-----|-----|-----|-----|-----|-----|-----|-----|-----|-----|-----|-----|-----|-----|-----|-----|-----|-----|-----|-----|-----|-----|-----|-----|-----|-----|-----|-----|-----|-----|-----|-----|-----|-----|-----|-----|-----|-----|-----|-----|-----|-----|-----|-----|-----|-----|-----|-----|-----|-----|-----|-----|-----|-----|-----|-----|-----|-----|-----|-----|-----|-----|-----|-----|-----|-----|-----|-----|-----|-----|-----|-----|-----|-----|-----|-----|-----|-----|-----|-----|-----|-----|-----|-----|-----|-----|-----|-----|-----|-----|-----|-----|-----|-----|-----|-----|-----|-----|-----|-----|-----|-----|-----|-----|-----|-----|-----|-----|-----|-----|-----|-----|-----|-----|-----|-----|-----|-----|-----|-----|-----|-----|-----|-----|-----|-----|-----|-----|-----|-----|-----|-----|-----|-----|-----|-----|-----|-----|-----|-----|-----|-----|-----|-----|-----|-----|-----|-----|-----|-----|-----|-----|-----|-----|-----|-----|-----|-----|-----|-----|-----|-----|-----|-----|-----|-----|-----|-----|-----|-----|-----|-----|-----|-----|-----|-----|-----|-----|-----|-----|-----|-----|-----|-----|-----|-----|-----|-----|-----|-----|-----|-----|-----|-----|-----|-----|-----|-----|-----|-----|-----|-----|-----|-----|-----|-----|-----|-----|-----|-----|-----|-----|-----|-----|-----|-----|-----|-----|-----|-----|-----|-----|-----|-----|-----|-----|-----|-----|-----|-----|-----|-----|-----|-----|-----|-----|-----|-----|-----|-----|-----|-----|-----|-----|-----|-----|-----|-----|-----|-----|-----|-----|-----|-----|-----|-----|-----|-----|-----|-----|-----|-----|-----|-----|-----|-----|-----|-----|-----|-----|-----|-----|-----|-----|-----|-----|-----|-----|-----|-----|-----|-----|-----|-----|-----|-----|-----|-----|-----|-----|-----|-----|-----|-----|-----|-----|-----|-----|-----|-----|-----|-----|-----|-----|-----|-----|-----|-----|-----|-----|-----|-----|-----|-----|-----|-----|-----|-----|-----|-----|-----|-----|-----|-----|-----|-----|-----|-----|-----|-----|-----|-----|-----|-----|-----|-----|-----|-----|-----|-----|-----|-----|-----|-----|-----|-----|-----|-----|-----|-----|-----|-----|-----|-----|-----|-----|-----|-----|-----|-----|-----|-----|-----|-----|-----|-----|-----|-----|-----|-----|-----|-----|-----|-----|-----|-----|-----|-----|-----|-----|-----|-----|-----|-----|-----|-----|-----|-----|-----|-----|-----|-----|-----|-----|-----|-----|-----|-----|-----|-----|-----|-----|-----|-----|-----|-----|-----|-----|-----|-----|-----|-----|-----|-----|-----|-----|-----|-----|-----|-----|-----|-----|-----|-----|-----|-----|-----|-----|-----|-----|-----|-----|-----|-----|-----|-----|-----|-----|-----|-----|-----|-----|-----|-----|-----|-----|-----|-----|-----|-----|-----|-----|-----|-----|-----|-----|-----|-----|-----|-----|-----|-----|-----|-----|-----|-----|-----|-----|-----|-----|-----|-----|-----|-----|-----|-----|-----|-----|-----|-----|-----|-----|-----|-----|-----|-----|-----|-----|-----|-----|-----|-----|-----|-----|-----|-----|-----|-----|-----|-----|-----|-----|-----|-----|-----|-----|-----|-----|-----|-----|-----|-----|-----|-----|-----|-----|-----|-----|-----|-----|-----|-----|-----|-----|-----|-----|-----|-----|-----|-----|-----|-----|-----|-----|-----|-----|-----|-----|-----|-----|-----|-----|-----|-----|-----|-----|-----|-----|-----|-----|-----|-----|-----|-----|-----|-----|-----|-----|-----|-----|-----|-----|-----|-----|-----|-----|-----|-----|-----|-----|-----|-----|-----|-----|-----|-----|-----|-----|-----|-----|-----|-----|-----|-----|-----|-----|-----|-----|-----|-----|-----|-----|-----|-----|-----|-----|-----|-----|-----|-----|-----|------|------|------|------|------|------|------|------|------|------|------|------|------|------|------|------|------|------|------|------|------|------|------|------|------|------|------|------|------|------|------|------|------|------|------|------|------|------|------|------|------|------|------|------|------|------|------|------|------|------|------|------|------|------|------|------|------|------|------|------|------|------|------|------|------|------|------|------|------|------|------|------|------|------|------|------|------|------|------|------|------|------|------|------|------|------|------|------|------|------|------|------|------|------|------|------|------|------|------|------|------|------|------|------|------|------|------|------|------|------|------|------|------|------|------|------|------|------|------|------|------|------|------|------|------|------|------|------|------|------|------|------|------|------|------|------|------|------|------|------|------|------|------|------|------|------|------|------|------|------|------|------|------|------|------|------|------|------|------|------|------|------|------|------|------|------|------|------|------|------|------|------|------|------|------|------|------|------|------|------|------|------|------|------|------|------|------|------|------|------|------|------|------|------|------|------|------|------|------|------|------|------|------|------|------|------|------|------|------|------|------|------|------|------|------|------|------|------|------|------|------|------|------|------|------|------|------|------|------|------|------|------|------|------|------|------|------|------|------|------|------|------|------|------|------|------|------|------|------|------|------|------|------|------|------|------|------|------|------|------|------|------|------|------|------|------|------|------|------|------|------|------|------|------|------|------|------|------|------|------|------|------|------|------|------|------|------|------|------|------|------|------|------|------|------|------|------|------|------|------|------|------|------|------|------|------|------|------|------|------|------|------|------|------|------|------|------|------|------|------|------|------|------|------|------|------|------|------|------|------|------|------|------|------|------|------|------|------|------|------|------|------|------|------|------|------|------|------|------|------|------|------|------|------|------|------|------|------|------|------|------|------|------|------|------|------|------|------|------|------|------|------|------|------|------|------|------|------|------|------|------|------|------|------|------|------|------|------|------|------|------|------|------|------|------|------|------|------|------|------|------|------|------|------|------|------|------|------|------|------|------|------|------|------|------|------|------|------|------|------|------|------|------|------|------|------|------|------|------|------|------|------|------|------|------|------|------|------|------|------|------|------|------|------|------|------|------|------|------|------|------|------|------|------|------|------|------|------|------|------|------|------|------|------|------|------|------|------|------|------|------|------|------|------|------|------|------|------|------|------|------|------|------|------|------|------|------|----|
| 1 | 2 | 3 | 4 | 5 | 6 | 7 | 8 | 9 | 10 | 11 | 12 | 13 | 14 | 15 | 16 | 17 | 18 | 19 | 20 | 21 | 22 | 23 | 24 | 25 | 26 | 27 | 28 | 29 | 30 | 31 | 32 | 33 | 34 | 35 | 36 | 37 | 38 | 39 | 40 | 41 | 42 | 43 | 44 | 45 | 46 | 47 | 48 | 49 | 50 | 51 | 52 | 53 | 54 | 55 | 56 | 57 | 58 | 59 | 60 | 61 | 62 | 63 | 64 | 65 | 66 | 67 | 68 | 69 | 70 | 71 | 72 | 73 | 74 | 75 | 76 | 77 | 78 | 79 | 80 | 81 | 82 | 83 | 84 | 85 | 86 | 87 | 88 | 89 | 90 | 91 | 92 | 93 | 94 | 95 | 96 | 97 | 98 | 99 | 100 | 101 | 102 | 103 | 104 | 105 | 106 | 107 | 108 | 109 | 110 | 111 | 112 | 113 | 114 | 115 | 116 | 117 | 118 | 119 | 120 | 121 | 122 | 123 | 124 | 125 | 126 | 127 | 128 | 129 | 130 | 131 | 132 | 133 | 134 | 135 | 136 | 137 | 138 | 139 | 140 | 141 | 142 | 143 | 144 | 145 | 146 | 147 | 148 | 149 | 150 | 151 | 152 | 153 | 154 | 155 | 156 | 157 | 158 | 159 | 160 | 161 | 162 | 163 | 164 | 165 | 166 | 167 | 168 | 169 | 170 | 171 | 172 | 173 | 174 | 175 | 176 | 177 | 178 | 179 | 180 | 181 | 182 | 183 | 184 | 185 | 186 | 187 | 188 | 189 | 190 | 191 | 192 | 193 | 194 | 195 | 196 | 197 | 198 | 199 | 200 | 201 | 202 | 203 | 204 | 205 | 206 | 207 | 208 | 209 | 210 | 211 | 212 | 213 | 214 | 215 | 216 | 217 | 218 | 219 | 220 | 221 | 222 | 223 | 224 | 225 | 226 | 227 | 228 | 229 | 230 | 231 | 232 | 233 | 234 | 235 | 236 | 237 | 238 | 239 | 240 | 241 | 242 | 243 | 244 | 245 | 246 | 247 | 248 | 249 | 250 | 251 | 252 | 253 | 254 | 255 | 256 | 257 | 258 | 259 | 260 | 261 | 262 | 263 | 264 | 265 | 266 | 267 | 268 | 269 | 270 | 271 | 272 | 273 | 274 | 275 | 276 | 277 | 278 | 279 | 280 | 281 | 282 | 283 | 284 | 285 | 286 | 287 | 288 | 289 | 290 | 291 | 292 | 293 | 294 | 295 | 296 | 297 | 298 | 299 | 300 | 301 | 302 | 303 | 304 | 305 | 306 | 307 | 308 | 309 | 310 | 311 | 312 | 313 | 314 | 315 | 316 | 317 | 318 | 319 | 320 | 321 | 322 | 323 | 324 | 325 | 326 | 327 | 328 | 329 | 330 | 331 | 332 | 333 | 334 | 335 | 336 | 337 | 338 | 339 | 340 | 341 | 342 | 343 | 344 | 345 | 346 | 347 | 348 | 349 | 350 | 351 | 352 | 353 | 354 | 355 | 356 | 357 | 358 | 359 | 360 | 361 | 362 | 363 | 364 | 365 | 366 | 367 | 368 | 369 | 370 | 371 | 372 | 373 | 374 | 375 | 376 | 377 | 378 | 379 | 380 | 381 | 382 | 383 | 384 | 385 | 386 | 387 | 388 | 389 | 390 | 391 | 392 | 393 | 394 | 395 | 396 | 397 | 398 | 399 | 400 | 401 | 402 | 403 | 404 | 405 | 406 | 407 | 408 | 409 | 410 | 411 | 412 | 413 | 414 | 415 | 416 | 417 | 418 | 419 | 420 | 421 | 422 | 423 | 424 | 425 | 426 | 427 | 428 | 429 | 430 | 431 | 432 | 433 | 434 | 435 | 436 | 437 | 438 | 439 | 440 | 441 | 442 | 443 | 444 | 445 | 446 | 447 | 448 | 449 | 450 | 451 | 452 | 453 | 454 | 455 | 456 | 457 | 458 | 459 | 460 | 461 | 462 | 463 | 464 | 465 | 466 | 467 | 468 | 469 | 470 | 471 | 472 | 473 | 474 | 475 | 476 | 477 | 478 | 479 | 480 | 481 | 482 | 483 | 484 | 485 | 486 | 487 | 488 | 489 | 490 | 491 | 492 | 493 | 494 | 495 | 496 | 497 | 498 | 499 | 500 | 501 | 502 | 503 | 504 | 505 | 506 | 507 | 508 | 509 | 510 | 511 | 512 | 513 | 514 | 515 | 516 | 517 | 518 | 519 | 520 | 521 | 522 | 523 | 524 | 525 | 526 | 527 | 528 | 529 | 530 | 531 | 532 | 533 | 534 | 535 | 536 | 537 | 538 | 539 | 540 | 541 | 542 | 543 | 544 | 545 | 546 | 547 | 548 | 549 | 550 | 551 | 552 | 553 | 554 | 555 | 556 | 557 | 558 | 559 | 560 | 561 | 562 | 563 | 564 | 565 | 566 | 567 | 568 | 569 | 570 | 571 | 572 | 573 | 574 | 575 | 576 | 577 | 578 | 579 | 580 | 581 | 582 | 583 | 584 | 585 | 586 | 587 | 588 | 589 | 590 | 591 | 592 | 593 | 594 | 595 | 596 | 597 | 598 | 599 | 600 | 601 | 602 | 603 | 604 | 605 | 606 | 607 | 608 | 609 | 610 | 611 | 612 | 613 | 614 | 615 | 616 | 617 | 618 | 619 | 620 | 621 | 622 | 623 | 624 | 625 | 626 | 627 | 628 | 629 | 630 | 631 | 632 | 633 | 634 | 635 | 636 | 637 | 638 | 639 | 640 | 641 | 642 | 643 | 644 | 645 | 646 | 647 | 648 | 649 | 650 | 651 | 652 | 653 | 654 | 655 | 656 | 657 | 658 | 659 | 660 | 661 | 662 | 663 | 664 | 665 | 666 | 667 | 668 | 669 | 670 | 671 | 672 | 673 | 674 | 675 | 676 | 677 | 678 | 679 | 680 | 681 | 682 | 683 | 684 | 685 | 686 | 687 | 688 | 689 | 690 | 691 | 692 | 693 | 694 | 695 | 696 | 697 | 698 | 699 | 700 | 701 | 702 | 703 | 704 | 705 | 706 | 707 | 708 | 709 | 710 | 711 | 712 | 713 | 714 | 715 | 716 | 717 | 718 | 719 | 720 | 721 | 722 | 723 | 724 | 725 | 726 | 727 | 728 | 729 | 730 | 731 | 732 | 733 | 734 | 735 | 736 | 737 | 738 | 739 | 740 | 741 | 742 | 743 | 744 | 745 | 746 | 747 | 748 | 749 | 750 | 751 | 752 | 753 | 754 | 755 | 756 | 757 | 758 | 759 | 760 | 761 | 762 | 763 | 764 | 765 | 766 | 767 | 768 | 769 | 770 | 771 | 772 | 773 | 774 | 775 | 776 | 777 | 778 | 779 | 780 | 781 | 782 | 783 | 784 | 785 | 786 | 787 | 788 | 789 | 790 | 791 | 792 | 793 | 794 | 795 | 796 | 797 | 798 | 799 | 800 | 801 | 802 | 803 | 804 | 805 | 806 | 807 | 808 | 809 | 810 | 811 | 812 | 813 | 814 | 815 | 816 | 817 | 818 | 819 | 820 | 821 | 822 | 823 | 824 | 825 | 826 | 827 | 828 | 829 | 830 | 831 | 832 | 833 | 834 | 835 | 836 | 837 | 838 | 839 | 840 | 841 | 842 | 843 | 844 | 845 | 846 | 847 | 848 | 849 | 850 | 851 | 852 | 853 | 854 | 855 | 856 | 857 | 858 | 859 | 860 | 861 | 862 | 863 | 864 | 865 | 866 | 867 | 868 | 869 | 870 | 871 | 872 | 873 | 874 | 875 | 876 | 877 | 878 | 879 | 880 | 881 | 882 | 883 | 884 | 885 | 886 | 887 | 888 | 889 | 890 | 891 | 892 | 893 | 894 | 895 | 896 | 897 | 898 | 899 | 900 | 901 | 902 | 903 | 904 | 905 | 906 | 907 | 908 | 909 | 910 | 911 | 912 | 913 | 914 | 915 | 916 | 917 | 918 | 919 | 920 | 921 | 922 | 923 | 924 | 925 | 926 | 927 | 928 | 929 | 930 | 931 | 932 | 933 | 934 | 935 | 936 | 937 | 938 | 939 | 940 | 941 | 942 | 943 | 944 | 945 | 946 | 947 | 948 | 949 | 950 | 951 | 952 | 953 | 954 | 955 | 956 | 957 | 958 | 959 | 960 | 961 | 962 | 963 | 964 | 965 | 966 | 967 | 968 | 969 | 970 | 971 | 972 | 973 | 974 | 975 | 976 | 977 | 978 | 979 | 980 | 981 | 982 | 983 | 984 | 985 | 986 | 987 | 988 | 989 | 990 | 991 | 992 | 993 | 994 | 995 | 996 | 997 | 998 | 999 | 1000 | 1001 | 1002 | 1003 | 1004 | 1005 | 1006 | 1007 | 1008 | 1009 | 1010 | 1011 | 1012 | 1013 | 1014 | 1015 | 1016 | 1017 | 1018 | 1019 | 1020 | 1021 | 1022 | 1023 | 1024 | 1025 | 1026 | 1027 | 1028 | 1029 | 1030 | 1031 | 1032 | 1033 | 1034 | 1035 | 1036 | 1037 | 1038 | 1039 | 1040 | 1041 | 1042 | 1043 | 1044 | 1045 | 1046 | 1047 | 1048 | 1049 | 1050 | 1051 | 1052 | 1053 | 1054 | 1055 | 1056 | 1057 | 1058 | 1059 | 1060 | 1061 | 1062 | 1063 | 1064 | 1065 | 1066 | 1067 | 1068 | 1069 | 1070 | 1071 | 1072 | 1073 | 1074 | 1075 | 1076 | 1077 | 1078 | 1079 | 1080 | 1081 | 1082 | 1083 | 1084 | 1085 | 1086 | 1087 | 1088 | 1089 | 1090 | 1091 | 1092 | 1093 | 1094 | 1095 | 1096 | 1097 | 1098 | 1099 | 1100 | 1101 | 1102 | 1103 | 1104 | 1105 | 1106 | 1107 | 1108 | 1109 | 1110 | 1111 | 1112 | 1113 | 1114 | 1115 | 1116 | 1117 | 1118 | 1119 | 1120 | 1121 | 1122 | 1123 | 1124 | 1125 | 1126 | 1127 | 1128 | 1129 | 1130 | 1131 | 1132 | 1133 | 1134 | 1135 | 1136 | 1137 | 1138 | 1139 | 1140 | 1141 | 1142 | 1143 | 1144 | 1145 | 1146 | 1147 | 1148 | 1149 | 1150 | 1151 | 1152 | 1153 | 1154 | 1155 | 1156 | 1157 | 1158 | 1159 | 1160 | 1161 | 1162 | 1163 | 1164 | 1165 | 1166 | 1167 | 1168 | 1169 | 1170 | 1171 | 1172 | 1173 | 1174 | 1175 | 1176 | 1177 | 1178 | 1179 | 1180 | 1181 | 1182 | 1183 | 1184 | 1185 | 1186 | 1187 | 1188 | 1189 | 1190 | 1191 | 1192 | 1193 | 1194 | 1195 | 1196 | 1197 | 1198 | 1199 | 1200 | 1201 | 1202 | 1203 | 1204 | 1205 | 1206 | 1207 | 1208 | 1209 | 1210 | 1211 | 1212 | 1213 | 1214 | 1215 | 1216 | 1217 | 1218 | 1219 | 1220 | 1221 | 1222 | 1223 | 1224 | 1225 | 1226 | 1227 | 1228 | 1229 | 1230 | 1231 | 1232 | 1233 | 1234 | 1235 | 1236 | 1237 | 1238 | 1239 | 1240 | 1241 | 1242 | 1243 | 1244 | 1245 | 1246 | 1247 | 1248 | 1249 | 1250 | 1251 | 1252 | 1253 | 1254 | 1255 | 1256 | 1257 | 1258 | 1259 | 1260 | 1261 | 1262 | 1263 | 1264 | 1265 | 1266 | 1267 | 1268 | 1269 | 1270 | 1271 | 1272 | 1273 | 1274 | 1275 | 1276 | 1277 | 1278 | 1279 | 1280 | 1281 | 1282 | 1283 | 1284 | 1285 | 1286 | 1287 | 1288 | 1289 | 1290 | 1291 | 1292 | 1293 | 1294 | 1295 | 1296 | 1297 | 1298 | 1299 | 1300 | 1301 | 1302 | 1303 | 1304 | 1305 | 1306 | 1307 | 1308 | 1309 | 1310 | 1311 | 1312 | 1313 | 1314 | 1315 | 1316 | 1317 | 1318 | 1319 | 1320 | 1321 | 1322 | 1323 | 1324 | 1325 | 1326 | 1327 | 1328 | 1329 | 1330 | 1331 | 1332 | 1333 | 1334 | 1335 | 1336 | 1337 | 1338 | 1339 | 1340 | 1341 | 1342 | 1343 | 1344 | 1345 | 1346 | 1347 | 1348 | 1349 | 1350 | 1351 | 1352 | 1353 | 1354 | 1355 | 1356 | 1357 | 1358 | 1359 | 1360 | 1361 | 1362 | 1363 | 1364 | 1365 | 1366 | 1367 | 1368 | 1369 | 1370 | 1371 | 1372 | 1373 | 1374 | 1375 | 1376 | 1377 | 1378 | 1379 | 1380 | 1381 | 1382 | 1383 | 1384 | 1385 | 1386 | 1387 | 1388 | 1389 | 1390 | 1391 | 1392 | 1393 | 1394 | 1395 | 1396 | 1397 | 1398 | 1399 | 1400 | 1401 | 1402 | 1403 | 1404 | 1405 | 1406 | 1407 | 1408 | 1409 | 1410 | 1411 | 1412 | 1413 | 1414 | 1415 | 1416 | 1417 | 1418 | 1419 | 1420 | 1421 | 1422 | 1423 | 1424 | 1425 | 1426 | 1427 | 1428 | 1429 | 1430 | 1431 | 1432 | 1433 | 1434 | 1435 | 1436 | 1437 | 1438 | 1439 | 1440 | 1441 | 1442 | 1443 | 1444 | 1445 | 1446 | 1447 | 1448 | 1449 | 1450 | 1451 | 1452 | 1453 | 1454 | 1455 | 1456 | 1457 | 1458 | 1459 | 1460 | 1461 | 1462 | 1463 | 1464 | 1465 | 1466 | 1467 | 1468 | 1469 | 1470 | 1471 | 1472 | 1473 | 1474 | 1475 | 1476 | 1477 | 1478 | 1479 | 1480 | 1481 | 1482 | 1483 | 1484 | 1485 | 1486 | 14 |
|---|---|---|---|---|---|---|---|---|----|----|----|----|----|----|----|----|----|----|----|----|----|----|----|----|----|----|----|----|----|----|----|----|----|----|----|----|----|----|----|----|----|----|----|----|----|----|----|----|----|----|----|----|----|----|----|----|----|----|----|----|----|----|----|----|----|----|----|----|----|----|----|----|----|----|----|----|----|----|----|----|----|----|----|----|----|----|----|----|----|----|----|----|----|----|----|----|----|----|-----|-----|-----|-----|-----|-----|-----|-----|-----|-----|-----|-----|-----|-----|-----|-----|-----|-----|-----|-----|-----|-----|-----|-----|-----|-----|-----|-----|-----|-----|-----|-----|-----|-----|-----|-----|-----|-----|-----|-----|-----|-----|-----|-----|-----|-----|-----|-----|-----|-----|-----|-----|-----|-----|-----|-----|-----|-----|-----|-----|-----|-----|-----|-----|-----|-----|-----|-----|-----|-----|-----|-----|-----|-----|-----|-----|-----|-----|-----|-----|-----|-----|-----|-----|-----|-----|-----|-----|-----|-----|-----|-----|-----|-----|-----|-----|-----|-----|-----|-----|-----|-----|-----|-----|-----|-----|-----|-----|-----|-----|-----|-----|-----|-----|-----|-----|-----|-----|-----|-----|-----|-----|-----|-----|-----|-----|-----|-----|-----|-----|-----|-----|-----|-----|-----|-----|-----|-----|-----|-----|-----|-----|-----|-----|-----|-----|-----|-----|-----|-----|-----|-----|-----|-----|-----|-----|-----|-----|-----|-----|-----|-----|-----|-----|-----|-----|-----|-----|-----|-----|-----|-----|-----|-----|-----|-----|-----|-----|-----|-----|-----|-----|-----|-----|-----|-----|-----|-----|-----|-----|-----|-----|-----|-----|-----|-----|-----|-----|-----|-----|-----|-----|-----|-----|-----|-----|-----|-----|-----|-----|-----|-----|-----|-----|-----|-----|-----|-----|-----|-----|-----|-----|-----|-----|-----|-----|-----|-----|-----|-----|-----|-----|-----|-----|-----|-----|-----|-----|-----|-----|-----|-----|-----|-----|-----|-----|-----|-----|-----|-----|-----|-----|-----|-----|-----|-----|-----|-----|-----|-----|-----|-----|-----|-----|-----|-----|-----|-----|-----|-----|-----|-----|-----|-----|-----|-----|-----|-----|-----|-----|-----|-----|-----|-----|-----|-----|-----|-----|-----|-----|-----|-----|-----|-----|-----|-----|-----|-----|-----|-----|-----|-----|-----|-----|-----|-----|-----|-----|-----|-----|-----|-----|-----|-----|-----|-----|-----|-----|-----|-----|-----|-----|-----|-----|-----|-----|-----|-----|-----|-----|-----|-----|-----|-----|-----|-----|-----|-----|-----|-----|-----|-----|-----|-----|-----|-----|-----|-----|-----|-----|-----|-----|-----|-----|-----|-----|-----|-----|-----|-----|-----|-----|-----|-----|-----|-----|-----|-----|-----|-----|-----|-----|-----|-----|-----|-----|-----|-----|-----|-----|-----|-----|-----|-----|-----|-----|-----|-----|-----|-----|-----|-----|-----|-----|-----|-----|-----|-----|-----|-----|-----|-----|-----|-----|-----|-----|-----|-----|-----|-----|-----|-----|-----|-----|-----|-----|-----|-----|-----|-----|-----|-----|-----|-----|-----|-----|-----|-----|-----|-----|-----|-----|-----|-----|-----|-----|-----|-----|-----|-----|-----|-----|-----|-----|-----|-----|-----|-----|-----|-----|-----|-----|-----|-----|-----|-----|-----|-----|-----|-----|-----|-----|-----|-----|-----|-----|-----|-----|-----|-----|-----|-----|-----|-----|-----|-----|-----|-----|-----|-----|-----|-----|-----|-----|-----|-----|-----|-----|-----|-----|-----|-----|-----|-----|-----|-----|-----|-----|-----|-----|-----|-----|-----|-----|-----|-----|-----|-----|-----|-----|-----|-----|-----|-----|-----|-----|-----|-----|-----|-----|-----|-----|-----|-----|-----|-----|-----|-----|-----|-----|-----|-----|-----|-----|-----|-----|-----|-----|-----|-----|-----|-----|-----|-----|-----|-----|-----|-----|-----|-----|-----|-----|-----|-----|-----|-----|-----|-----|-----|-----|-----|-----|-----|-----|-----|-----|-----|-----|-----|-----|-----|-----|-----|-----|-----|-----|-----|-----|-----|-----|-----|-----|-----|-----|-----|-----|-----|-----|-----|-----|-----|-----|-----|-----|-----|-----|-----|-----|-----|-----|-----|-----|-----|-----|-----|-----|-----|-----|-----|-----|-----|-----|-----|-----|-----|-----|-----|-----|-----|-----|-----|-----|-----|-----|-----|-----|-----|-----|-----|-----|-----|-----|-----|-----|-----|-----|-----|-----|-----|-----|-----|-----|-----|-----|-----|-----|-----|-----|-----|-----|-----|-----|-----|-----|-----|-----|-----|-----|-----|-----|-----|-----|-----|-----|-----|-----|-----|-----|-----|-----|-----|-----|-----|-----|-----|-----|-----|-----|-----|-----|-----|-----|-----|-----|-----|-----|-----|-----|-----|-----|-----|-----|-----|-----|-----|-----|-----|-----|-----|-----|-----|-----|-----|-----|-----|-----|-----|-----|-----|-----|-----|-----|-----|-----|-----|-----|-----|-----|-----|-----|-----|-----|-----|-----|-----|-----|-----|-----|-----|-----|-----|-----|-----|-----|-----|-----|-----|-----|-----|-----|-----|-----|-----|-----|-----|-----|-----|-----|-----|-----|-----|-----|-----|-----|-----|-----|-----|-----|-----|-----|-----|-----|-----|-----|-----|-----|-----|-----|-----|-----|-----|-----|-----|-----|-----|-----|-----|-----|-----|-----|-----|-----|-----|-----|-----|-----|-----|-----|-----|-----|-----|-----|-----|-----|-----|-----|-----|-----|-----|-----|-----|-----|-----|-----|-----|-----|-----|-----|-----|-----|-----|-----|-----|-----|-----|-----|-----|-----|-----|-----|-----|-----|-----|-----|-----|-----|-----|-----|-----|-----|-----|-----|-----|-----|-----|-----|-----|-----|-----|-----|-----|-----|-----|-----|-----|-----|-----|-----|-----|-----|-----|-----|-----|-----|-----|-----|-----|-----|-----|-----|-----|-----|-----|-----|-----|-----|-----|-----|-----|-----|-----|-----|-----|-----|-----|-----|-----|-----|-----|-----|-----|-----|-----|-----|-----|-----|-----|-----|-----|-----|-----|-----|-----|-----|-----|-----|-----|-----|-----|-----|------|------|------|------|------|------|------|------|------|------|------|------|------|------|------|------|------|------|------|------|------|------|------|------|------|------|------|------|------|------|------|------|------|------|------|------|------|------|------|------|------|------|------|------|------|------|------|------|------|------|------|------|------|------|------|------|------|------|------|------|------|------|------|------|------|------|------|------|------|------|------|------|------|------|------|------|------|------|------|------|------|------|------|------|------|------|------|------|------|------|------|------|------|------|------|------|------|------|------|------|------|------|------|------|------|------|------|------|------|------|------|------|------|------|------|------|------|------|------|------|------|------|------|------|------|------|------|------|------|------|------|------|------|------|------|------|------|------|------|------|------|------|------|------|------|------|------|------|------|------|------|------|------|------|------|------|------|------|------|------|------|------|------|------|------|------|------|------|------|------|------|------|------|------|------|------|------|------|------|------|------|------|------|------|------|------|------|------|------|------|------|------|------|------|------|------|------|------|------|------|------|------|------|------|------|------|------|------|------|------|------|------|------|------|------|------|------|------|------|------|------|------|------|------|------|------|------|------|------|------|------|------|------|------|------|------|------|------|------|------|------|------|------|------|------|------|------|------|------|------|------|------|------|------|------|------|------|------|------|------|------|------|------|------|------|------|------|------|------|------|------|------|------|------|------|------|------|------|------|------|------|------|------|------|------|------|------|------|------|------|------|------|------|------|------|------|------|------|------|------|------|------|------|------|------|------|------|------|------|------|------|------|------|------|------|------|------|------|------|------|------|------|------|------|------|------|------|------|------|------|------|------|------|------|------|------|------|------|------|------|------|------|------|------|------|------|------|------|------|------|------|------|------|------|------|------|------|------|------|------|------|------|------|------|------|------|------|------|------|------|------|------|------|------|------|------|------|------|------|------|------|------|------|------|------|------|------|------|------|------|------|------|------|------|------|------|------|------|------|------|------|------|------|------|------|------|------|------|------|------|------|------|------|------|------|------|------|------|------|------|------|------|------|------|------|------|------|------|------|------|------|------|------|------|------|------|------|------|------|------|------|------|------|------|------|------|------|------|------|------|------|------|------|------|------|------|------|------|------|------|------|------|------|------|------|------|------|------|------|------|------|------|------|------|------|------|------|------|------|------|------|------|------|------|------|------|------|----|

|  |                                                                                                                                                                                                                                                   |                                                                                                                                                                                                                                                   |  |  |  |  |  |  |  |  |  |  |  |  |  |  |  |  |  |  |  |  |  |  |  |  |  |  |  |  |  |  |  |  |  |  |  |  |  |  |  |  |  |  |  |  |  |  |  |  |  |  |  |  |  |  |  |  |  |  |  |  |  |  |  |  |  |  |  |  |  |  |  |  |  |  |  |  |  |  |  |  |  |  |  |  |  |  |  |  |  |  |  |  |  |  |  |  |  |  |  |  |  |  |  |  |  |  |  |  |  |  |  |  |  |  |  |  |  |  |  |  |  |  |  |  |  |  |  |  |  |  |  |  |  |  |  |  |  |  |  |  |  |  |  |  |  |  |  |  |  |  |  |  |  |  |  |  |  |  |  |  |  |  |  |  |  |  |  |  |  |  |  |  |  |  |  |  |  |  |  |  |  |  |  |  |  |  |  |  |  |  |  |  |  |  |  |  |  |  |  |  |  |  |  |  |  |  |  |  |  |  |  |  |  |  |  |  |  |  |  |  |  |  |  |  |  |  |  |  |  |  |  |  |  |  |  |  |  |  |  |  |  |  |  |  |  |  |  |  |  |  |  |  |  |  |  |  |  |  |  |  |  |  |  |  |  |  |  |  |  |  |  |  |  |  |  |  |  |  |  |  |  |  |  |  |  |  |  |  |  |  |  |  |  |  |  |  |  |  |  |  |  |  |  |  |  |  |  |  |  |  |  |  |  |  |  |  |  |  |  |  |  |  |  |  |  |  |  |  |  |  |  |  |  |  |  |  |  |  |  |  |  |  |  |  |  |  |  |  |  |  |  |  |  |  |  |  |  |  |  |  |  |  |  |  |  |  |  |  |  |  |  |  |  |  |  |  |  |  |  |  |  |  |  |  |  |  |  |  |  |  |  |  |  |  |  |  |  |  |  |  |  |  |  |  |  |  |  |  |  |  |  |  |  |  |  |  |  |  |  |  |  |  |  |  |  |  |  |  |  |  |  |  |  |  |  |  |  |  |  |  |  |  |  |  |  |  |  |  |  |  |  |  |  |  |  |  |  |  |  |  |  |  |  |  |  |  |  |  |  |  |  |  |  |  |  |  |  |  |  |  |  |  |  |  |  |  |  |  |  |  |  |  |  |  |  |  |  |  |  |  |  |  |  |  |  |  |  |  |  |  |  |  |  |  |  |  |  |  |  |  |  |  |  |  |  |  |  |  |  |  |  |  |  |  |  |  |  |  |  |  |  |  |  |  |  |  |  |  |  |  |  |  |  |  |  |  |  |  |  |  |  |  |  |  |  |  |  |  |  |  |  |  |  |  |  |  |  |  |  |  |  |  |  |  |  |  |  |  |  |  |  |  |  |  |  |  |  |  |  |  |  |  |  |  |  |  |  |  |  |  |  |  |  |  |  |  |  |  |  |  |  |  |  |  |  |  |  |  |  |  |  |  |  |  |  |  |  |  |  |  |  |  |  |  |  |  |  |  |  |  |  |  |  |  |  |  |  |  |  |  |  |  |  |  |  |  |  |  |  |  |  |  |  |  |  |  |  |  |  |  |  |  |  |  |  |  |  |  |  |  |  |  |  |  |  |  |  |  |  |  |  |  |  |  |  |  |  |  |  |  |  |  |  |  |  |  |  |  |  |  |  |  |  |  |  |  |  |  |  |  |  |  |  |  |  |  |  |  |  |  |  |  |  |  |  |  |  |  |  |  |  |  |  |  |  |  |  |  |  |  |  |  |  |  |  |  |  |  |  |  |  |  |  |  |  |  |  |  |  |  |  |  |  |  |  |  |  |  |  |  |  |  |  |  |  |  |  |  |  |  |  |  |  |  |  |  |  |  |  |  |  |  |  |  |  |  |  |  |  |  |  |  |  |  |  |  |  |  |  |  |  |  |  |  |  |  |  |  |  |  |  |  |  |  |  |  |  |  |  |  |  |  |  |  |  |  |  |  |  |  |  |  |  |  |  |  |  |  |  |  |  |  |  |  |  |  |  |  |  |  |  |  |  |  |  |  |  |  |  |  |  |  |  |  |  |  |  |  |  |  |  |  |  |  |  |  |  |  |  |  |  |  |  |  |  |  |  |  |  |  |  |  |  |  |  |  |  |  |  |  |  |  |  |  |  |  |  |  |  |  |  |  |  |  |  |  |  |  |  |  |  |  |  |  |  |  |  |  |  |  |  |  |  |  |  |  |  |  |  |  |  |  |  |  |  |  |  |  |  |  |  |  |  |  |  |  |  |  |  |  |  |  |  |  |  |  |  |  |  |  |  |  |  |  |  |  |  |  |  |  |  |  |  |  |  |  |  |  |  |  |  |  |  |  |  |  |  |  |  |  |  |  |  |  |  |  |  |  |  |  |  |  |  |  |  |  |  |  |  |  |  |  |  |  |  |  |  |  |  |  |  |  |  |  |  |  |  |  |  |  |  |  |  |  |  |  |  |  |  |  |  |  |  |  |  |  |  |  |  |  |  |  |  |  |  |  |  |  |  |  |  |  |  |  |  |  |  |  |  |  |  |  |  |  |  |  |  |  |  |  |  |  |  |  |  |  |  |  |  |  |  |  |  |  |  |  |  |  |  |  |  |  |  |  |  |  |  |  |  |  |  |  |  |  |  |  |  |  |  |  |  |  |  |  |  |  |  |  |  |  |  |  |  |  |  |  |  |  |  |  |  |  |  |  |  |  |  |  |  |  |  |  |  |  |  |  |  |  |  |  |  |  |  |  |  |  |  |  |  |  |  |  |  |  |  |  |  |  |  |  |  |  |  |  |  |  |  |  |  |  |  |  |  |  |  |  |  |  |  |  |  |  |  |  |  |  |  |  |  |  |  |  |  |  |  |  |  |  |  |  |  |  |  |  |  |  |  |  |  |  |  |  |  |  |  |  |  |  |  |  |  |  |  |  |  |  |  |  |  |  |  |  |  |  |  |  |  |  |  |  |  |  |  |  |  |  |  |  |  |
|--|---------------------------------------------------------------------------------------------------------------------------------------------------------------------------------------------------------------------------------------------------|---------------------------------------------------------------------------------------------------------------------------------------------------------------------------------------------------------------------------------------------------|--|--|--|--|--|--|--|--|--|--|--|--|--|--|--|--|--|--|--|--|--|--|--|--|--|--|--|--|--|--|--|--|--|--|--|--|--|--|--|--|--|--|--|--|--|--|--|--|--|--|--|--|--|--|--|--|--|--|--|--|--|--|--|--|--|--|--|--|--|--|--|--|--|--|--|--|--|--|--|--|--|--|--|--|--|--|--|--|--|--|--|--|--|--|--|--|--|--|--|--|--|--|--|--|--|--|--|--|--|--|--|--|--|--|--|--|--|--|--|--|--|--|--|--|--|--|--|--|--|--|--|--|--|--|--|--|--|--|--|--|--|--|--|--|--|--|--|--|--|--|--|--|--|--|--|--|--|--|--|--|--|--|--|--|--|--|--|--|--|--|--|--|--|--|--|--|--|--|--|--|--|--|--|--|--|--|--|--|--|--|--|--|--|--|--|--|--|--|--|--|--|--|--|--|--|--|--|--|--|--|--|--|--|--|--|--|--|--|--|--|--|--|--|--|--|--|--|--|--|--|--|--|--|--|--|--|--|--|--|--|--|--|--|--|--|--|--|--|--|--|--|--|--|--|--|--|--|--|--|--|--|--|--|--|--|--|--|--|--|--|--|--|--|--|--|--|--|--|--|--|--|--|--|--|--|--|--|--|--|--|--|--|--|--|--|--|--|--|--|--|--|--|--|--|--|--|--|--|--|--|--|--|--|--|--|--|--|--|--|--|--|--|--|--|--|--|--|--|--|--|--|--|--|--|--|--|--|--|--|--|--|--|--|--|--|--|--|--|--|--|--|--|--|--|--|--|--|--|--|--|--|--|--|--|--|--|--|--|--|--|--|--|--|--|--|--|--|--|--|--|--|--|--|--|--|--|--|--|--|--|--|--|--|--|--|--|--|--|--|--|--|--|--|--|--|--|--|--|--|--|--|--|--|--|--|--|--|--|--|--|--|--|--|--|--|--|--|--|--|--|--|--|--|--|--|--|--|--|--|--|--|--|--|--|--|--|--|--|--|--|--|--|--|--|--|--|--|--|--|--|--|--|--|--|--|--|--|--|--|--|--|--|--|--|--|--|--|--|--|--|--|--|--|--|--|--|--|--|--|--|--|--|--|--|--|--|--|--|--|--|--|--|--|--|--|--|--|--|--|--|--|--|--|--|--|--|--|--|--|--|--|--|--|--|--|--|--|--|--|--|--|--|--|--|--|--|--|--|--|--|--|--|--|--|--|--|--|--|--|--|--|--|--|--|--|--|--|--|--|--|--|--|--|--|--|--|--|--|--|--|--|--|--|--|--|--|--|--|--|--|--|--|--|--|--|--|--|--|--|--|--|--|--|--|--|--|--|--|--|--|--|--|--|--|--|--|--|--|--|--|--|--|--|--|--|--|--|--|--|--|--|--|--|--|--|--|--|--|--|--|--|--|--|--|--|--|--|--|--|--|--|--|--|--|--|--|--|--|--|--|--|--|--|--|--|--|--|--|--|--|--|--|--|--|--|--|--|--|--|--|--|--|--|--|--|--|--|--|--|--|--|--|--|--|--|--|--|--|--|--|--|--|--|--|--|--|--|--|--|--|--|--|--|--|--|--|--|--|--|--|--|--|--|--|--|--|--|--|--|--|--|--|--|--|--|--|--|--|--|--|--|--|--|--|--|--|--|--|--|--|--|--|--|--|--|--|--|--|--|--|--|--|--|--|--|--|--|--|--|--|--|--|--|--|--|--|--|--|--|--|--|--|--|--|--|--|--|--|--|--|--|--|--|--|--|--|--|--|--|--|--|--|--|--|--|--|--|--|--|--|--|--|--|--|--|--|--|--|--|--|--|--|--|--|--|--|--|--|--|--|--|--|--|--|--|--|--|--|--|--|--|--|--|--|--|--|--|--|--|--|--|--|--|--|--|--|--|--|--|--|--|--|--|--|--|--|--|--|--|--|--|--|--|--|--|--|--|--|--|--|--|--|--|--|--|--|--|--|--|--|--|--|--|--|--|--|--|--|--|--|--|--|--|--|--|--|--|--|--|--|--|--|--|--|--|--|--|--|--|--|--|--|--|--|--|--|--|--|--|--|--|--|--|--|--|--|--|--|--|--|--|--|--|--|--|--|--|--|--|--|--|--|--|--|--|--|--|--|--|--|--|--|--|--|--|--|--|--|--|--|--|--|--|--|--|--|--|--|--|--|--|--|--|--|--|--|--|--|--|--|--|--|--|--|--|--|--|--|--|--|--|--|--|--|--|--|--|--|--|--|--|--|--|--|--|--|--|--|--|--|--|--|--|--|--|--|--|--|--|--|--|--|--|--|--|--|--|--|--|--|--|--|--|--|--|--|--|--|--|--|--|--|--|--|--|--|--|--|--|--|--|--|--|--|--|--|--|--|--|--|--|--|--|--|--|--|--|--|--|--|--|--|--|--|--|--|--|--|--|--|--|--|--|--|--|--|--|--|--|--|--|--|--|--|--|--|--|--|--|--|--|--|--|--|--|--|--|--|--|--|--|--|--|--|--|--|--|--|--|--|--|--|--|--|--|--|--|--|--|--|--|--|--|--|--|--|--|--|--|--|--|--|--|--|--|--|--|--|--|--|--|--|--|--|--|--|--|--|--|--|--|--|--|--|--|--|--|--|--|--|--|--|--|--|--|--|--|--|--|--|--|--|--|--|--|--|--|--|--|--|--|--|--|--|--|--|--|--|--|--|--|--|--|--|--|--|--|--|--|--|--|--|--|--|--|--|--|--|--|--|--|--|--|--|--|--|--|--|--|--|--|--|--|--|--|--|--|--|--|--|--|--|--|--|--|--|--|--|--|--|--|--|--|--|--|--|--|--|--|--|--|--|--|--|--|--|--|--|--|--|--|--|--|--|--|--|--|--|--|--|--|--|--|--|--|--|--|--|--|--|--|--|--|--|--|--|--|--|--|--|--|--|--|--|--|--|--|--|--|
|  | 1. The company is a public company.<br>2. The company is a private company.<br>3. The company is a partnership.<br>4. The company is a sole proprietorship.<br>5. The company is a limited liability company.<br>6. The company is a corporation. | 1. The company is a public company.<br>2. The company is a private company.<br>3. The company is a partnership.<br>4. The company is a sole proprietorship.<br>5. The company is a limited liability company.<br>6. The company is a corporation. |  |  |  |  |  |  |  |  |  |  |  |  |  |  |  |  |  |  |  |  |  |  |  |  |  |  |  |  |  |  |  |  |  |  |  |  |  |  |  |  |  |  |  |  |  |  |  |  |  |  |  |  |  |  |  |  |  |  |  |  |  |  |  |  |  |  |  |  |  |  |  |  |  |  |  |  |  |  |  |  |  |  |  |  |  |  |  |  |  |  |  |  |  |  |  |  |  |  |  |  |  |  |  |  |  |  |  |  |  |  |  |  |  |  |  |  |  |  |  |  |  |  |  |  |  |  |  |  |  |  |  |  |  |  |  |  |  |  |  |  |  |  |  |  |  |  |  |  |  |  |  |  |  |  |  |  |  |  |  |  |  |  |  |  |  |  |  |  |  |  |  |  |  |  |  |  |  |  |  |  |  |  |  |  |  |  |  |  |  |  |  |  |  |  |  |  |  |  |  |  |  |  |  |  |  |  |  |  |  |  |  |  |  |  |  |  |  |  |  |  |  |  |  |  |  |  |  |  |  |  |  |  |  |  |  |  |  |  |  |  |  |  |  |  |  |  |  |  |  |  |  |  |  |  |  |  |  |  |  |  |  |  |  |  |  |  |  |  |  |  |  |  |  |  |  |  |  |  |  |  |  |  |  |  |  |  |  |  |  |  |  |  |  |  |  |  |  |  |  |  |  |  |  |  |  |  |  |  |  |  |  |  |  |  |  |  |  |  |  |  |  |  |  |  |  |  |  |  |  |  |  |  |  |  |  |  |  |  |  |  |  |  |  |  |  |  |  |  |  |  |  |  |  |  |  |  |  |  |  |  |  |  |  |  |  |  |  |  |  |  |  |  |  |  |  |  |  |  |  |  |  |  |  |  |  |  |  |  |  |  |  |  |  |  |  |  |  |  |  |  |  |  |  |  |  |  |  |  |  |  |  |  |  |  |  |  |  |  |  |  |  |  |  |  |  |  |  |  |  |  |  |  |  |  |  |  |  |  |  |  |  |  |  |  |  |  |  |  |  |  |  |  |  |  |  |  |  |  |  |  |  |  |  |  |  |  |  |  |  |  |  |  |  |  |  |  |  |  |  |  |  |  |  |  |  |  |  |  |  |  |  |  |  |  |  |  |  |  |  |  |  |  |  |  |  |  |  |  |  |  |  |  |  |  |  |  |  |  |  |  |  |  |  |  |  |  |  |  |  |  |  |  |  |  |  |  |  |  |  |  |  |  |  |  |  |  |  |  |  |  |  |  |  |  |  |  |  |  |  |  |  |  |  |  |  |  |  |  |  |  |  |  |  |  |  |  |  |  |  |  |  |  |  |  |  |  |  |  |  |  |  |  |  |  |  |  |  |  |  |  |  |  |  |  |  |  |  |  |  |  |  |  |  |  |  |  |  |  |  |  |  |  |  |  |  |  |  |  |  |  |  |  |  |  |  |  |  |  |  |  |  |  |  |  |  |  |  |  |  |  |  |  |  |  |  |  |  |  |  |  |  |  |  |  |  |  |  |  |  |  |  |  |  |  |  |  |  |  |  |  |  |  |  |  |  |  |  |  |  |  |  |  |  |  |  |  |  |  |  |  |  |  |  |  |  |  |  |  |  |  |  |  |  |  |  |  |  |  |  |  |  |  |  |  |  |  |  |  |  |  |  |  |  |  |  |  |  |  |  |  |  |  |  |  |  |  |  |  |  |  |  |  |  |  |  |  |  |  |  |  |  |  |  |  |  |  |  |  |  |  |  |  |  |  |  |  |  |  |  |  |  |  |  |  |  |  |  |  |  |  |  |  |  |  |  |  |  |  |  |  |  |  |  |  |  |  |  |  |  |  |  |  |  |  |  |  |  |  |  |  |  |  |  |  |  |  |  |  |  |  |  |  |  |  |  |  |  |  |  |  |  |  |  |  |  |  |  |  |  |  |  |  |  |  |  |  |  |  |  |  |  |  |  |  |  |  |  |  |  |  |  |  |  |  |  |  |  |  |  |  |  |  |  |  |  |  |  |  |  |  |  |  |  |  |  |  |  |  |  |  |  |  |  |  |  |  |  |  |  |  |  |  |  |  |  |  |  |  |  |  |  |  |  |  |  |  |  |  |  |  |  |  |  |  |  |  |  |  |  |  |  |  |  |  |  |  |  |  |  |  |  |  |  |  |  |  |  |  |  |  |  |  |  |  |  |  |  |  |  |  |  |  |  |  |  |  |  |  |  |  |  |  |  |  |  |  |  |  |  |  |  |  |  |  |  |  |  |  |  |  |  |  |  |  |  |  |  |  |  |  |  |  |  |  |  |  |  |  |  |  |  |  |  |  |  |  |  |  |  |  |  |  |  |  |  |  |  |  |  |  |  |  |  |  |  |  |  |  |  |  |  |  |  |  |  |  |  |  |  |  |  |  |  |  |  |  |  |  |  |  |  |  |  |  |  |  |  |  |  |  |  |  |  |  |  |  |  |  |  |  |  |  |  |  |  |  |  |  |  |  |  |  |  |  |  |  |  |  |  |  |  |  |  |  |  |  |  |  |  |  |  |  |  |  |  |  |  |  |  |  |  |  |  |  |  |  |  |  |  |  |  |  |  |  |  |  |  |  |  |  |  |  |  |  |  |  |  |  |  |  |  |  |  |  |  |  |  |  |  |  |  |  |  |  |  |  |  |  |  |  |  |  |  |  |  |  |  |  |  |  |  |  |  |  |  |  |  |  |  |  |  |  |  |  |  |  |  |  |  |  |  |  |  |  |  |  |  |  |  |  |  |  |  |  |  |  |  |  |  |  |  |  |  |  |  |  |  |  |  |  |  |  |  |  |  |  |  |  |  |  |  |  |  |  |  |  |  |  |  |  |  |  |  |  |  |  |  |  |  |  |  |  |  |  |  |  |  |  |  |  |  |  |  |  |  |  |  |  |  |  |  |  |  |  |  |  |  |  |  |  |  |  |  |  |  |  |  |  |  |
|--|---------------------------------------------------------------------------------------------------------------------------------------------------------------------------------------------------------------------------------------------------|---------------------------------------------------------------------------------------------------------------------------------------------------------------------------------------------------------------------------------------------------|--|--|--|--|--|--|--|--|--|--|--|--|--|--|--|--|--|--|--|--|--|--|--|--|--|--|--|--|--|--|--|--|--|--|--|--|--|--|--|--|--|--|--|--|--|--|--|--|--|--|--|--|--|--|--|--|--|--|--|--|--|--|--|--|--|--|--|--|--|--|--|--|--|--|--|--|--|--|--|--|--|--|--|--|--|--|--|--|--|--|--|--|--|--|--|--|--|--|--|--|--|--|--|--|--|--|--|--|--|--|--|--|--|--|--|--|--|--|--|--|--|--|--|--|--|--|--|--|--|--|--|--|--|--|--|--|--|--|--|--|--|--|--|--|--|--|--|--|--|--|--|--|--|--|--|--|--|--|--|--|--|--|--|--|--|--|--|--|--|--|--|--|--|--|--|--|--|--|--|--|--|--|--|--|--|--|--|--|--|--|--|--|--|--|--|--|--|--|--|--|--|--|--|--|--|--|--|--|--|--|--|--|--|--|--|--|--|--|--|--|--|--|--|--|--|--|--|--|--|--|--|--|--|--|--|--|--|--|--|--|--|--|--|--|--|--|--|--|--|--|--|--|--|--|--|--|--|--|--|--|--|--|--|--|--|--|--|--|--|--|--|--|--|--|--|--|--|--|--|--|--|--|--|--|--|--|--|--|--|--|--|--|--|--|--|--|--|--|--|--|--|--|--|--|--|--|--|--|--|--|--|--|--|--|--|--|--|--|--|--|--|--|--|--|--|--|--|--|--|--|--|--|--|--|--|--|--|--|--|--|--|--|--|--|--|--|--|--|--|--|--|--|--|--|--|--|--|--|--|--|--|--|--|--|--|--|--|--|--|--|--|--|--|--|--|--|--|--|--|--|--|--|--|--|--|--|--|--|--|--|--|--|--|--|--|--|--|--|--|--|--|--|--|--|--|--|--|--|--|--|--|--|--|--|--|--|--|--|--|--|--|--|--|--|--|--|--|--|--|--|--|--|--|--|--|--|--|--|--|--|--|--|--|--|--|--|--|--|--|--|--|--|--|--|--|--|--|--|--|--|--|--|--|--|--|--|--|--|--|--|--|--|--|--|--|--|--|--|--|--|--|--|--|--|--|--|--|--|--|--|--|--|--|--|--|--|--|--|--|--|--|--|--|--|--|--|--|--|--|--|--|--|--|--|--|--|--|--|--|--|--|--|--|--|--|--|--|--|--|--|--|--|--|--|--|--|--|--|--|--|--|--|--|--|--|--|--|--|--|--|--|--|--|--|--|--|--|--|--|--|--|--|--|--|--|--|--|--|--|--|--|--|--|--|--|--|--|--|--|--|--|--|--|--|--|--|--|--|--|--|--|--|--|--|--|--|--|--|--|--|--|--|--|--|--|--|--|--|--|--|--|--|--|--|--|--|--|--|--|--|--|--|--|--|--|--|--|--|--|--|--|--|--|--|--|--|--|--|--|--|--|--|--|--|--|--|--|--|--|--|--|--|--|--|--|--|--|--|--|--|--|--|--|--|--|--|--|--|--|--|--|--|--|--|--|--|--|--|--|--|--|--|--|--|--|--|--|--|--|--|--|--|--|--|--|--|--|--|--|--|--|--|--|--|--|--|--|--|--|--|--|--|--|--|--|--|--|--|--|--|--|--|--|--|--|--|--|--|--|--|--|--|--|--|--|--|--|--|--|--|--|--|--|--|--|--|--|--|--|--|--|--|--|--|--|--|--|--|--|--|--|--|--|--|--|--|--|--|--|--|--|--|--|--|--|--|--|--|--|--|--|--|--|--|--|--|--|--|--|--|--|--|--|--|--|--|--|--|--|--|--|--|--|--|--|--|--|--|--|--|--|--|--|--|--|--|--|--|--|--|--|--|--|--|--|--|--|--|--|--|--|--|--|--|--|--|--|--|--|--|--|--|--|--|--|--|--|--|--|--|--|--|--|--|--|--|--|--|--|--|--|--|--|--|--|--|--|--|--|--|--|--|--|--|--|--|--|--|--|--|--|--|--|--|--|--|--|--|--|--|--|--|--|--|--|--|--|--|--|--|--|--|--|--|--|--|--|--|--|--|--|--|--|--|--|--|--|--|--|--|--|--|--|--|--|--|--|--|--|--|--|--|--|--|--|--|--|--|--|--|--|--|--|--|--|--|--|--|--|--|--|--|--|--|--|--|--|--|--|--|--|--|--|--|--|--|--|--|--|--|--|--|--|--|--|--|--|--|--|--|--|--|--|--|--|--|--|--|--|--|--|--|--|--|--|--|--|--|--|--|--|--|--|--|--|--|--|--|--|--|--|--|--|--|--|--|--|--|--|--|--|--|--|--|--|--|--|--|--|--|--|--|--|--|--|--|--|--|--|--|--|--|--|--|--|--|--|--|--|--|--|--|--|--|--|--|--|--|--|--|--|--|--|--|--|--|--|--|--|--|--|--|--|--|--|--|--|--|--|--|--|--|--|--|--|--|--|--|--|--|--|--|--|--|--|--|--|--|--|--|--|--|--|--|--|--|--|--|--|--|--|--|--|--|--|--|--|--|--|--|--|--|--|--|--|--|--|--|--|--|--|--|--|--|--|--|--|--|--|--|--|--|--|--|--|--|--|--|--|--|--|--|--|--|--|--|--|--|--|--|--|--|--|--|--|--|--|--|--|--|--|--|--|--|--|--|--|--|--|--|--|--|--|--|--|--|--|--|--|--|--|--|--|--|--|--|--|--|--|--|--|--|--|--|--|--|--|--|--|--|--|--|--|--|--|--|--|--|--|--|--|--|--|--|--|--|--|--|--|--|--|--|--|--|--|--|--|--|--|--|--|--|--|--|--|--|--|--|--|--|--|--|--|--|--|--|--|--|--|--|--|--|--|--|--|--|--|--|--|--|--|--|--|--|--|--|--|--|--|--|--|--|--|--|--|--|--|--|--|--|--|--|--|--|--|--|--|--|--|--|--|--|--|--|--|--|--|--|--|

El-Boghdadly K, *et al.* *Reg Anesth Pain Med* 2023;0:1–11. doi: 10.1136/rapm-2023-104884

El-Boghdadly K, et al. *Reg Anesth Pain Med* 2023;0:1–11. doi: 10.1136/rapm-2023-104884



[BACK TO CONTENTS](#)

|                       |                                                                                                |                                                                                                                |                                         |  |                                     |                                                                                                                                                                                                                                                                                                                                                                                                                                                                                                                                                                                                                                                                                 |                              |  |
|-----------------------|------------------------------------------------------------------------------------------------|----------------------------------------------------------------------------------------------------------------|-----------------------------------------|--|-------------------------------------|---------------------------------------------------------------------------------------------------------------------------------------------------------------------------------------------------------------------------------------------------------------------------------------------------------------------------------------------------------------------------------------------------------------------------------------------------------------------------------------------------------------------------------------------------------------------------------------------------------------------------------------------------------------------------------|------------------------------|--|
| COMMENTS              | Are there any further comments or suggestions you would like to make? <input type="checkbox"/> |                                                                                                                |                                         |  |                                     | 1. The "lateral sciatic nerve block" is missing, described in "An Ultrasound-Guided Lateral Approach for Proximal Sciatic Nerve Block: A Randomized Comparison With the Anterior Approach and a Cadaveric Evaluation," Takayuki Yoshida et al, Reg Anesth Pain Med. 2018 Oct; 43 (7): 712-719 ". The block is easy because the nerve is superficial and the patient can remain in the supine position<br>2. Wondering why blocks of the head and neck (including eyes) have been omitted ... perhaps something for the future?<br>3. For clarifying question 4: retroclavicular would be part of infraclavicular blocks but an extraordinary needle approach could be mentioned |                              |  |
|                       |                                                                                                |                                                                                                                |                                         |  |                                     |                                                                                                                                                                                                                                                                                                                                                                                                                                                                                                                                                                                                                                                                                 |                              |  |
| CLARIFYING QUESTION 1 | PLEXUSES                                                                                       | Should blocks of a plexus have the word "plexus" in the name?                                                  | Yes                                     |  | Unsure                              |                                                                                                                                                                                                                                                                                                                                                                                                                                                                                                                                                                                                                                                                                 | No                           |  |
|                       |                                                                                                |                                                                                                                | 88%                                     |  | 8%                                  |                                                                                                                                                                                                                                                                                                                                                                                                                                                                                                                                                                                                                                                                                 | 5%                           |  |
| CLARIFYING QUESTION 2 | NERVES                                                                                         | Should blocks of a nerve have the word "nerve" in the name?                                                    | Yes                                     |  | Unsure                              |                                                                                                                                                                                                                                                                                                                                                                                                                                                                                                                                                                                                                                                                                 | No                           |  |
|                       |                                                                                                |                                                                                                                | 81%                                     |  | 9%                                  |                                                                                                                                                                                                                                                                                                                                                                                                                                                                                                                                                                                                                                                                                 | 10%                          |  |
| CLARIFYING QUESTION 3 | INJECTION POINTS                                                                               | Should blocks of a peripheral nerve have the anatomical location of the injection point:                       | After the name of the nerve in brackets |  | After the name of the nerve in full |                                                                                                                                                                                                                                                                                                                                                                                                                                                                                                                                                                                                                                                                                 | Before the name of the nerve |  |
|                       |                                                                                                |                                                                                                                | 42%                                     |  | 17%                                 |                                                                                                                                                                                                                                                                                                                                                                                                                                                                                                                                                                                                                                                                                 | 36%                          |  |
|                       |                                                                                                |                                                                                                                | No location                             |  | Other                               |                                                                                                                                                                                                                                                                                                                                                                                                                                                                                                                                                                                                                                                                                 |                              |  |
|                       |                                                                                                |                                                                                                                | 4%                                      |  | 1%                                  |                                                                                                                                                                                                                                                                                                                                                                                                                                                                                                                                                                                                                                                                                 |                              |  |
| CLARIFYING QUESTION 4 | NEEDLE TRAJECTORIES                                                                            | Should blocks with different needle trajectories be named separately e.g. infraclavicular vs. retroclavicular? | Yes                                     |  | Unsure                              |                                                                                                                                                                                                                                                                                                                                                                                                                                                                                                                                                                                                                                                                                 | No                           |  |
|                       |                                                                                                |                                                                                                                | 51%                                     |  | 23%                                 |                                                                                                                                                                                                                                                                                                                                                                                                                                                                                                                                                                                                                                                                                 | 26%                          |  |
